# Supplementary material for: Metal-free catalysts for hydrogenation of both small and large imines: a computational experiment
Source: Royal Society of Chemistry journal article supplement (doi:10.1039/c0dt01297a), 2011-01-01
Supplement: c0dt01297a.pdf [file c0dt01297a.pdf]

## Supporting Information

### Metal-Free Catalysts for Hydrogenation of both Small and Large Imines: A Computational Experiment

*Lili Zhao, Haixia, Li, Gang Lu, Fang Huang, Chenggen Zhang, and Zhi-Xiang Wang\**

#### Contents:

|                                                                                                                            |    |
|----------------------------------------------------------------------------------------------------------------------------|----|
| <b>SI1.</b> The optimized structures for <b>im2/cat1</b> hydrogenation.....                                                | P2 |
| <b>SI2.</b> The optimized structures for <b>im1/cat2</b> hydrogenation.....                                                | P3 |
| <b>SI3.</b> The optimized structures and energetics of various complexes for <b>im2/(cat3 or cat4)</b> hydrogenations..... | P4 |
| <b>SI4.</b> The optimized structures for <b>im2/cat3</b> hydrogenation.....                                                | P5 |
| <b>SI5.</b> The optimized structures for <b>im2/cat3</b> hydrogenation.....                                                | P6 |
| <b>SI6.</b> The optimized structures and energetics of various complexes for <b>im1/(cat3 or cat4)</b> hydrogenations..... | P7 |
| <b>SI7.</b> The optimized structures for <b>im1/cat3</b> hydrogenation.....                                                | P7 |
| <b>SI8.</b> Cartesian coordinates and total energies of calculated structures.....                                         | P8 |

**S11** The optimized structures for **im2/cat1** hydrogenation

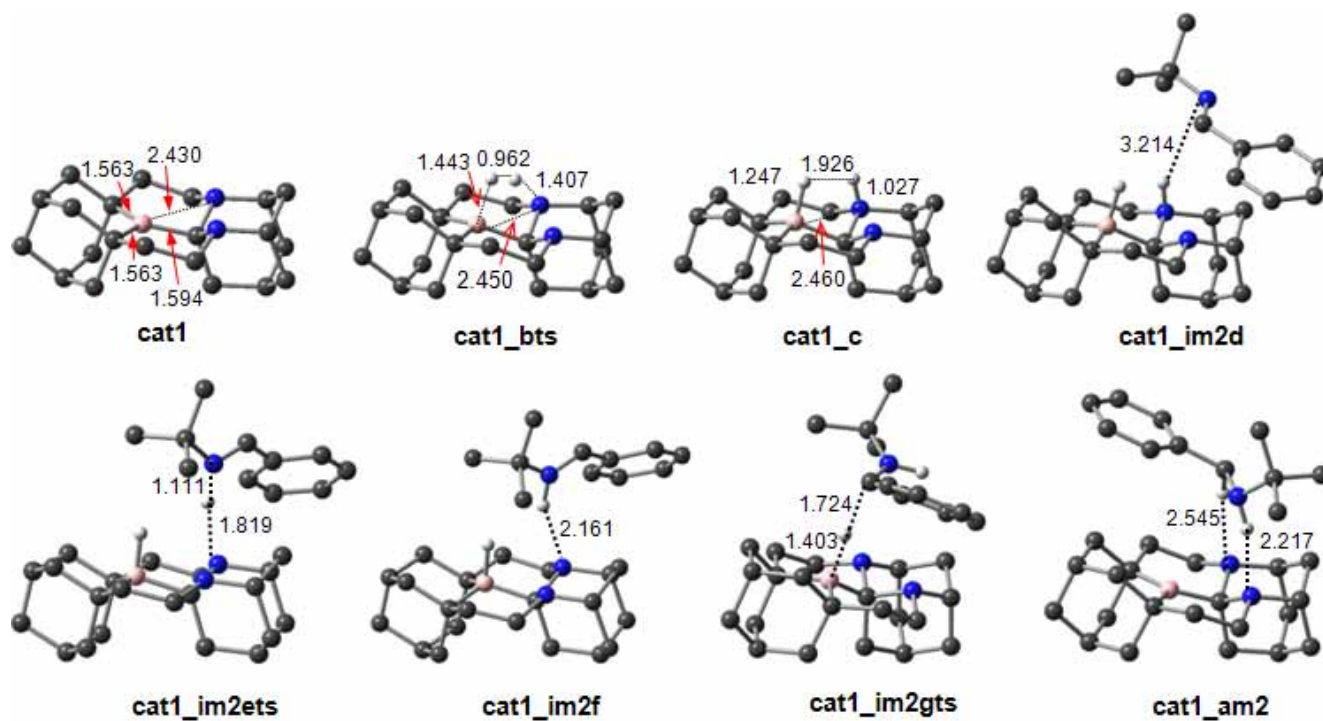

**Fig. S1** Optimized structures of the stationary points along the reaction pathway for **im2/cat1** hydrogenation, along with the key bond distances in Å. Trivial hydrogen atoms are omitted for clarity.

## SI2 The optimized structures for **im1/cat2** hydrogenation

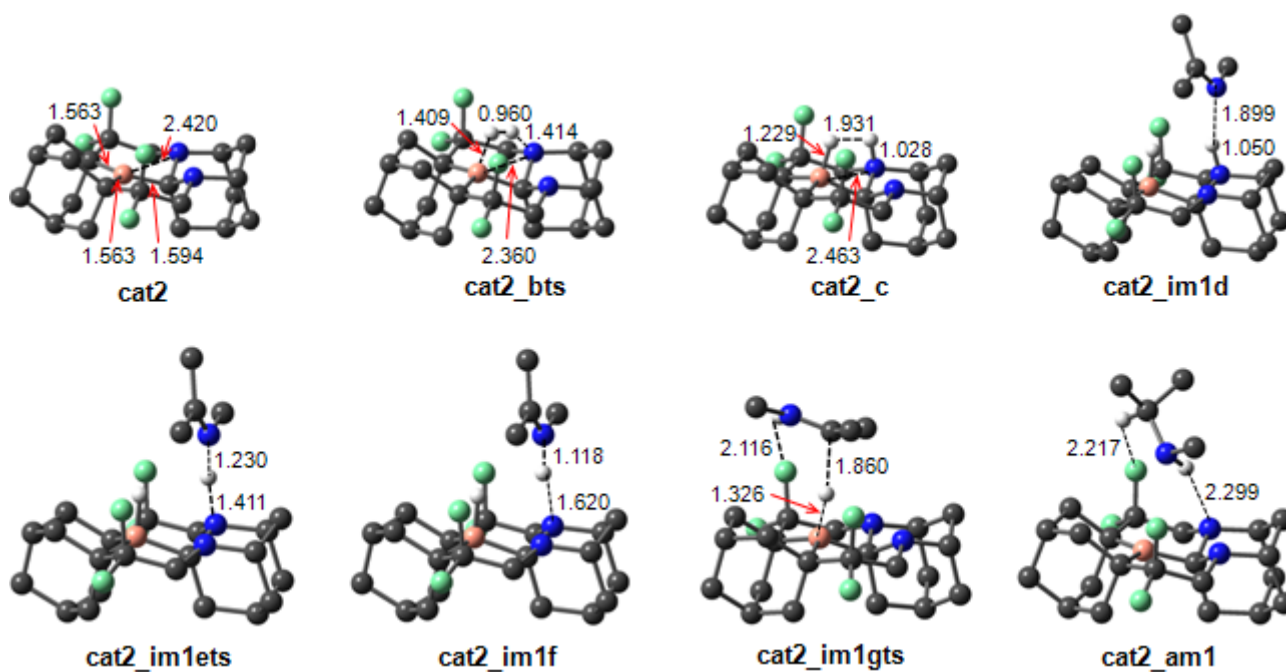

**Fig. S2** Optimized structures of the stationary points along the reaction pathway for **im1/cat2** hydrogenation, along with the key bond distances in Å. Trivial hydrogen atoms are omitted for clarity.

### SI3 The optimized structures and energetics of various complexes for **im2**/(**cat3** or **cat4**) hydrogenation s

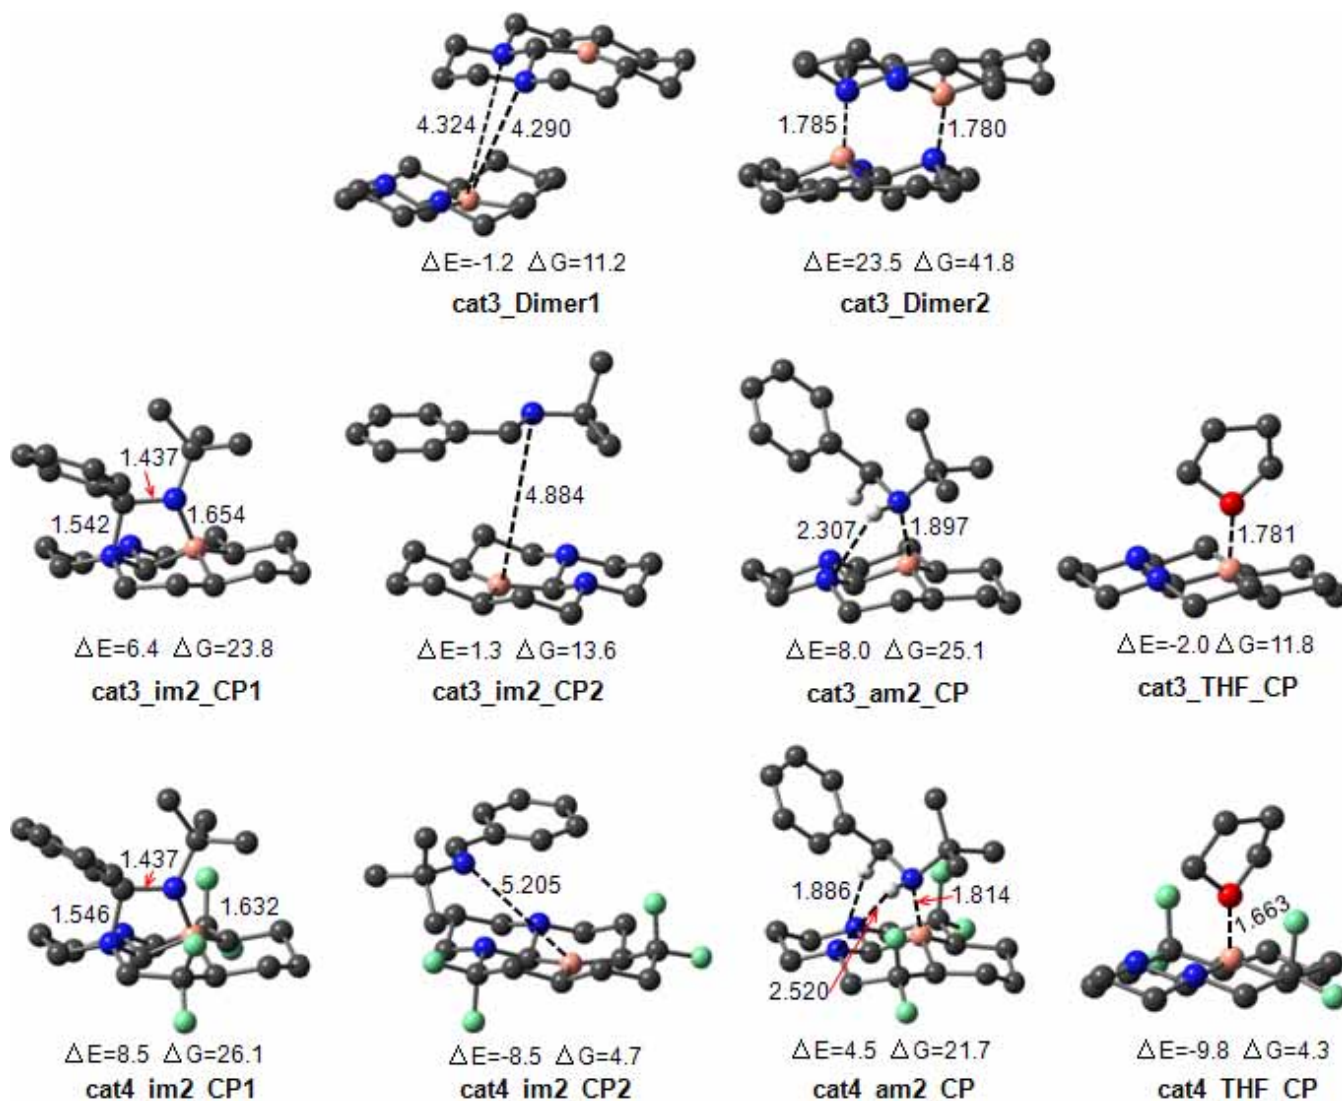

**Fig. S3** Optimized structures and energetics of various complexes between **cat3/cat4**, **im2** (*t*BuN=C(H)Ph), **am2** (*t*BuNH-CH<sub>2</sub>Ph) or THF. The  $\Delta E$  and  $\Delta G$  values are the binding energies and free Gibbs free energies (kcal/mol) at the M05-2X/6-311++G(2d,p)(IEFPCM)/M05-2X/6-31G(d,p) + ZPE level.

### SI4 The optimized structures for **im2/cat3** hydrogenation

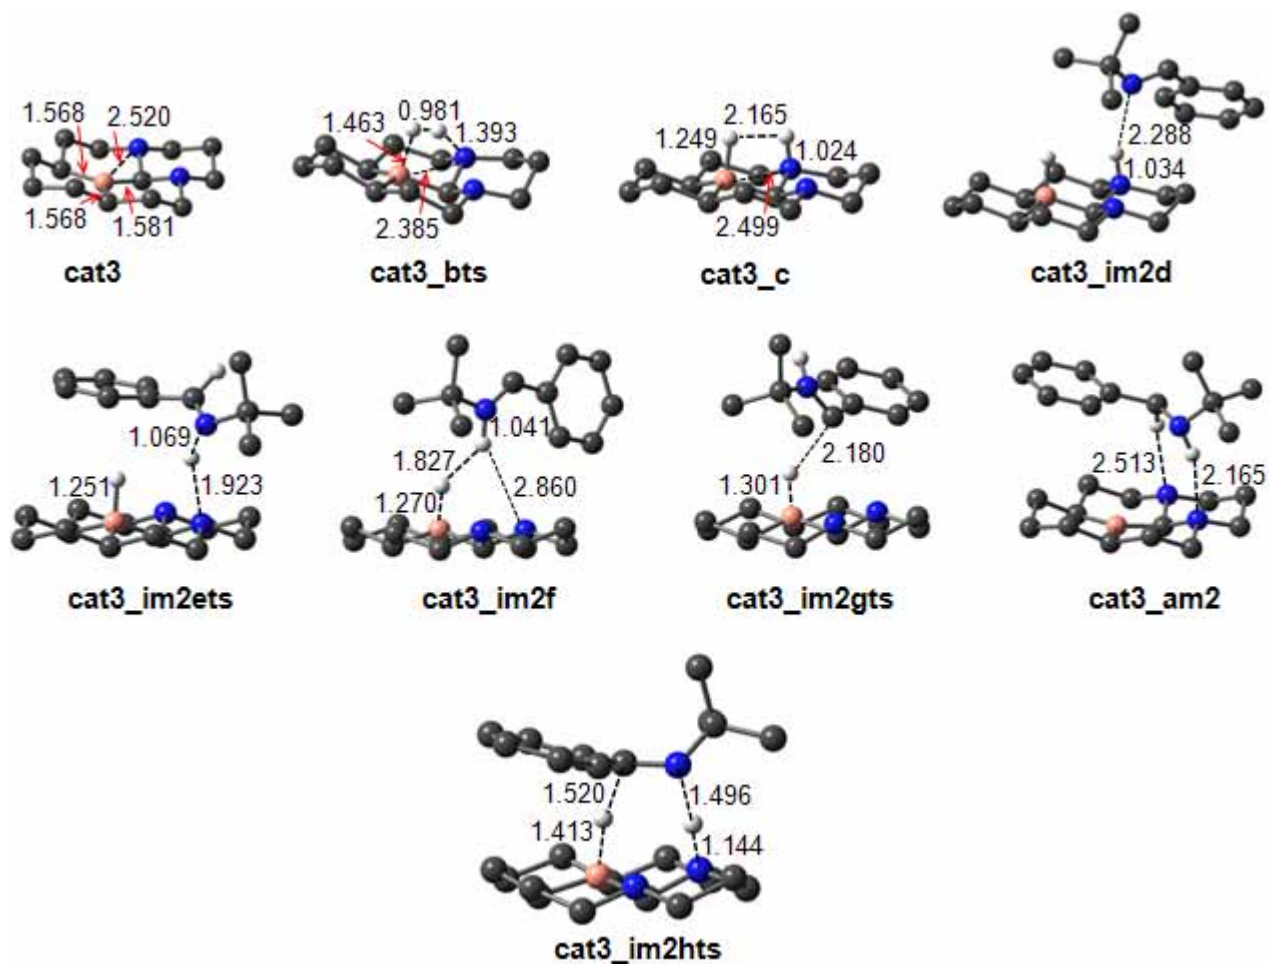

**Fig. S4** Optimized structures of the stationary points along the reaction pathway for **im2/cat3** hydrogenation, along with the key bond distances in Å. Trivial hydrogen atoms are omitted for clarity.

### SI5 The details on the two experimental hydrogen activation systems

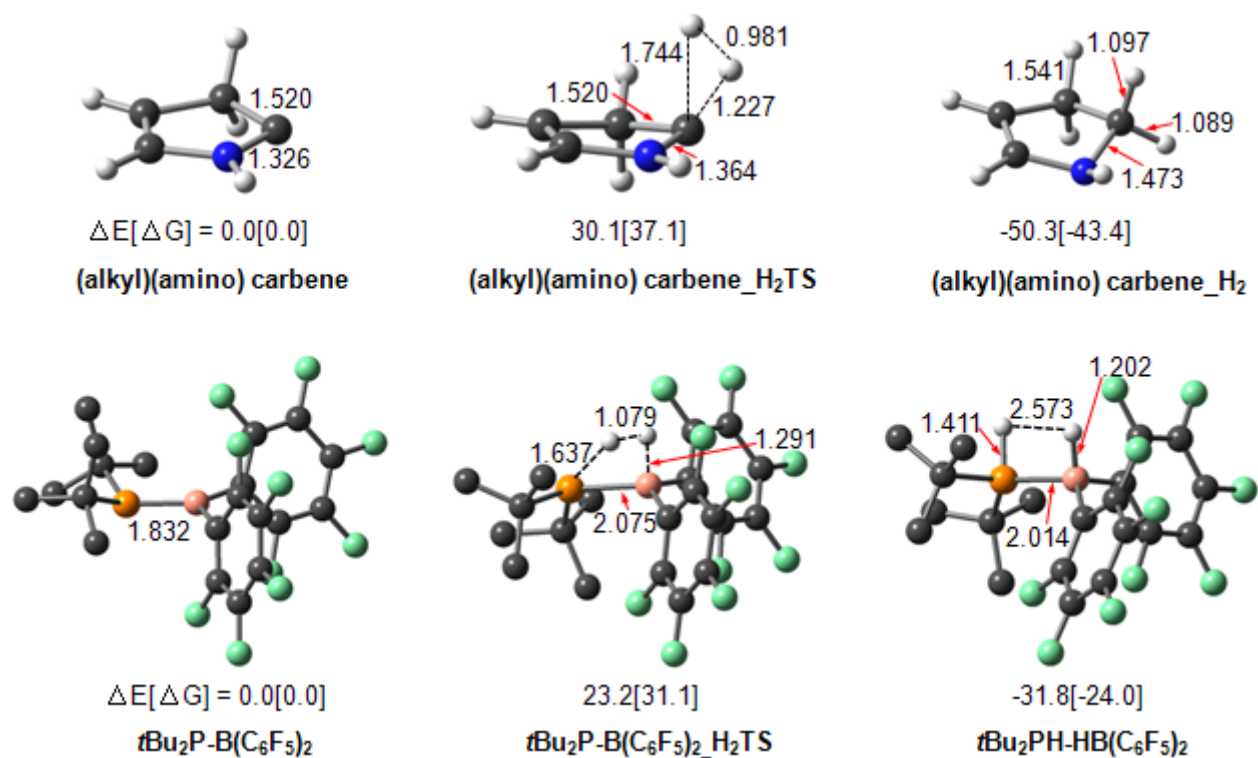

Fig. SI5 The energetic and geometric results about the two experimental hydrogen activation systems.

**SI6** The optimized structures and energetics of various complexes for **im1**/(**cat3** or **cat4**) hydrogenations

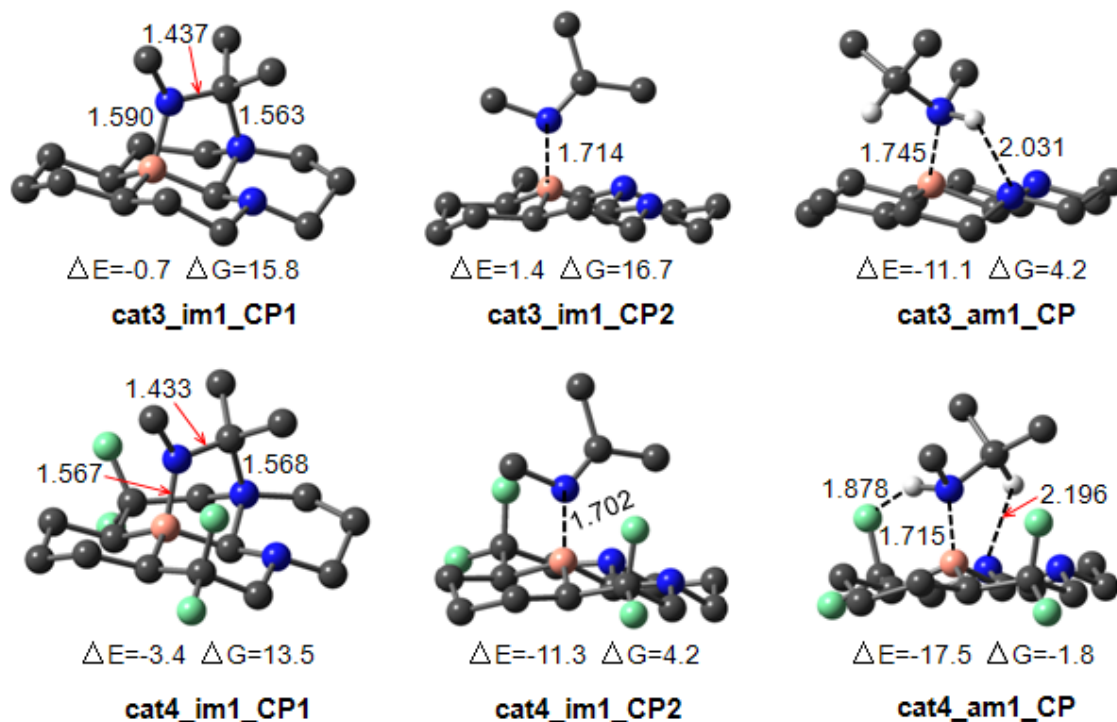

**Fig. SI6** M05-2X/6-31G(d,p) optimized structures of various complexes between **cat4**, and **im1** ( $\text{MeN}=\text{CMe}_2$ ), **am1** ( $\text{MeNH}-\text{CHMe}_2$ ).

**SI7** The optimized structures for **im1**/**cat3** hydrogenation

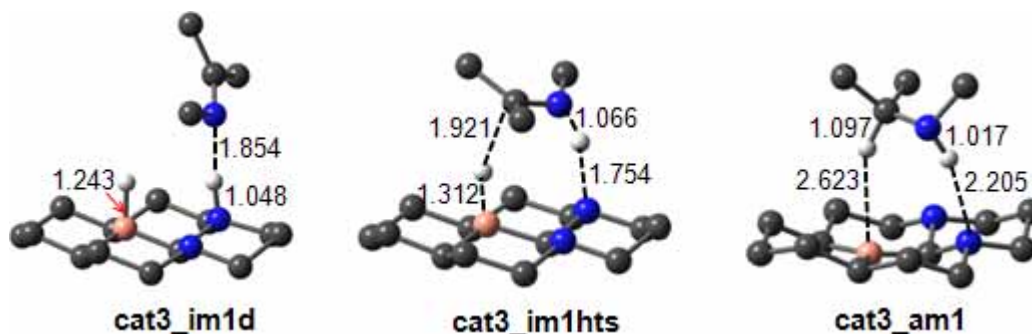

**Fig. SI7** Optimized structures of the stationary points along the reaction pathway for **im1**/**cat3** hydrogenation, along with the key bond distances in Å. Trivial hydrogen atoms are omitted for clarity.

**SI8.** The optimized geometries at the M05-2X/6-31G(d,p) level and total energies (with ZPE correction) of stationary points in both gas phase and solvent (including the non-electrostatic interactions) at the M05-2X/6-311++G(2d,p) level.

| <b>H<sub>2</sub></b> | Energy (E) | Energy(E)+ZPE | Enthalpy (H) | Gibbs free energy (G) |
|----------------------|------------|---------------|--------------|-----------------------|
| <b>IEFPCM (THF)</b>  | -1.165804  | -1.155511     | -1.152207    | -1.166994             |

H            0.000000   0.000000   0.370333  
 H            0.000000   0.000000  -0.370333

| <b>im1</b>          | Energy (E)  | Energy(E)+ZPE | Enthalpy (H) | Gibbs free energy (G) |
|---------------------|-------------|---------------|--------------|-----------------------|
| <b>IEFPCM (THF)</b> | -212.600598 | -212.474208   | -212.466531  | -212.504305           |

N            0.59595700 -0.83754800 -0.00003100  
 C            -1.78707800 -0.66547000  0.00000400  
 C            -0.40957800 -0.06090400  0.00000600  
 C            -0.33519200  1.45133100  0.00000700  
 H            -2.34660300 -0.33570400 -0.87959500  
 H            -1.70919500 -1.74995800 -0.00029700  
 H             0.20507500  1.80975200 -0.87978900  
 H            -1.32921300  1.89574100  0.00098600  
 H            -2.34636900 -0.33619200  0.87993700  
 H             0.20685100  1.80973900  0.87870500  
 C             1.91796600 -0.22773500  0.00000100  
 H             2.07935300  0.40028500 -0.88309400  
 H             2.07978000  0.39886500  0.88403300  
 H             2.67191600 -1.01302500 -0.00077800

| <b>am1</b>          | Energy (E)  | Energy(E)+ZPE | Enthalpy (H) | Gibbs free energy (G) |
|---------------------|-------------|---------------|--------------|-----------------------|
| <b>IEFPCM (THF)</b> | -213.811586 | -213.660154   | -213.65235   | -213.690057           |

C            0.43933300 -0.01080800 -0.33331600  
 N            -0.72095200 -0.68638100  0.24292300  
 H            -0.61330000 -0.71628900  1.25108900  
 C            -2.00240300 -0.08829500 -0.09698800  
 H            -2.10913600 -0.08092300 -1.18421200  
 H            -2.80539200 -0.70504900  0.30855500  
 H            -2.15023700  0.93978000  0.26101000  
 H             0.29164200 -0.02015000 -1.41937600  
 C             1.68236900 -0.83174300 -0.00568500



|   |             |             |             |
|---|-------------|-------------|-------------|
| H | 2.56867900  | -0.41142600 | -0.48342100 |
| H | 1.85551600  | -0.83577100 | 1.07489200  |
| H | 1.54972100  | -1.86190300 | -0.33457000 |
| C | 0.62054200  | 1.44234700  | 0.12002400  |
| H | 0.74614400  | 1.48157200  | 1.20635600  |
| H | 1.50908500  | 1.88240600  | -0.33718500 |
| H | -0.23510200 | 2.06340800  | -0.14780500 |

***t*BuN=C(H)Ph (*E*-isomer)**

| <b>im2</b>          | <b>Energy (E)</b> | <b>Energy(E)+ZPE</b> | <b>Enthalpy (H)</b> | <b>Gibbs free energy (G)</b> |
|---------------------|-------------------|----------------------|---------------------|------------------------------|
| <b>IEFPCM (THF)</b> | -483.013729       | -482.775235          | -482.762528         | -482.813188                  |

|   |             |             |             |
|---|-------------|-------------|-------------|
| C | -0.23256900 | 0.53856500  | 0.00001500  |
| N | -1.11112500 | -0.37402000 | -0.00000200 |
| C | -2.53939700 | -0.04796200 | -0.00002200 |
| C | -3.12459900 | -0.71219700 | 1.25112300  |
| H | -2.70880500 | -0.25746300 | 2.15219100  |
| H | -4.21050300 | -0.59716100 | 1.26898600  |
| H | -2.87799600 | -1.77429400 | 1.25605200  |
| C | -3.12459800 | -0.71232700 | -1.25108700 |
| H | -4.21050200 | -0.59731500 | -1.26891900 |
| H | -2.70883000 | -0.25766400 | -2.15220100 |
| H | -2.87797000 | -1.77441600 | -1.25590900 |
| C | -2.88559800 | 1.44285800  | -0.00006200 |
| H | -2.49725000 | 1.94627900  | 0.88830700  |
| H | -2.49722500 | 1.94629600  | -0.88841200 |
| H | -3.97082800 | 1.55616300  | -0.00008800 |
| C | 1.21178300  | 0.22786700  | 0.00003100  |
| C | 1.66586500  | -1.09411500 | 0.00003600  |
| C | 2.13568300  | 1.27279200  | 0.00001200  |
| C | 3.02744500  | -1.35995600 | 0.00001300  |
| H | 0.93143400  | -1.88889200 | 0.00007700  |
| C | 3.50129900  | 1.00567500  | -0.00002500 |
| H | 1.78105400  | 2.29796200  | 0.00003800  |
| C | 3.94798800  | -0.31140200 | -0.00003200 |
| H | 3.37718700  | -2.38489600 | 0.00002800  |
| H | 4.21292500  | 1.82171100  | -0.00003900 |
| H | 5.01003800  | -0.52315300 | -0.00008500 |
| H | -0.47467100 | 1.60620900  | -0.00001800 |

**tBuN=C(H)Ph (Z-isomer)**

|                     | Energy (E)  | Energy(E)+ZPE | Enthalpy (H) | Gibbs free energy (G) |
|---------------------|-------------|---------------|--------------|-----------------------|
| <b>IEFPCM (THF)</b> | -482.998328 | -482.760001   | -482.747221  | -482.798365           |

|   |             |             |             |
|---|-------------|-------------|-------------|
| C | 0.37594400  | -0.59196900 | 1.41998400  |
| H | 0.21372300  | -0.99859100 | 2.42260600  |
| N | 1.58895000  | -0.45641900 | 1.08373400  |
| C | 2.06488300  | 0.04608900  | -0.21532900 |
| C | 3.44124800  | -0.60436800 | -0.40090900 |
| H | 3.92528700  | -0.22718500 | -1.30418900 |
| H | 4.07100900  | -0.38921000 | 0.46271900  |
| H | 3.33751500  | -1.68787500 | -0.48613400 |
| C | 2.24364200  | 1.56251500  | -0.08445200 |
| H | 2.83173700  | 1.79657400  | 0.80413200  |
| H | 2.76307500  | 1.95143500  | -0.96292300 |
| H | 1.27553800  | 2.05946400  | -0.00827600 |
| C | 1.20015700  | -0.28706900 | -1.43851600 |
| H | 0.94980500  | -1.35005900 | -1.45291300 |
| H | 0.27649100  | 0.28693200  | -1.47423200 |
| H | 1.77384900  | -0.06188700 | -2.34057100 |
| C | -0.89346900 | -0.27255800 | 0.68992500  |
| C | -1.66476300 | -1.30149600 | 0.14684900  |
| C | -1.35693800 | 1.04190200  | 0.61521600  |
| C | -2.85929800 | -1.01447300 | -0.50434700 |
| H | -1.31648900 | -2.32506300 | 0.22130300  |
| C | -2.55630400 | 1.32759200  | -0.03089800 |
| H | -0.77824500 | 1.83821300  | 1.06722700  |
| C | -3.30521400 | 0.30128100  | -0.59832500 |
| H | -3.44313800 | -1.81726400 | -0.93714600 |
| H | -2.90603100 | 2.35081600  | -0.08870800 |
| H | -4.23609600 | 0.52395400  | -1.10422200 |

| <b>am2</b>          | Energy (E)  | Energy(E)+ZPE | Enthalpy (H) | Gibbs free energy (G) |
|---------------------|-------------|---------------|--------------|-----------------------|
| <b>IEFPCM (THF)</b> | -484.224235 | -483.961438   | -483.94814   | -484.001254           |

|   |            |             |             |
|---|------------|-------------|-------------|
| C | 0.19605900 | 0.68555500  | 0.38361000  |
| N | 1.08761000 | -0.26904900 | -0.26090500 |
| C | 2.53226000 | -0.06983700 | -0.06738700 |
| C | 3.00375200 | 1.34869200  | -0.41912000 |
| H | 2.58292800 | 2.09069100  | 0.26219700  |
| H | 4.09187900 | 1.41633400  | -0.35262000 |
| H | 2.70782100 | 1.60940300  | -1.43896200 |
| C | 3.22369100 | -1.07670600 | -0.98750700 |
| H | 4.30692000 | -1.03278100 | -0.86254400 |

|   |             |             |             |
|---|-------------|-------------|-------------|
| H | 2.87875800  | -2.08603100 | -0.75883500 |
| H | 2.99513200  | -0.86129700 | -2.03531300 |
| C | 2.89519300  | -0.39310700 | 1.38386600  |
| H | 2.47529600  | 0.33559600  | 2.07948900  |
| H | 2.51881400  | -1.38275600 | 1.64630100  |
| H | 3.97982700  | -0.38001500 | 1.50895800  |
| C | -1.25121400 | 0.29754300  | 0.16949100  |
| C | -1.63764700 | -1.04365500 | 0.18738900  |
| C | -2.22358900 | 1.27803500  | -0.02280600 |
| C | -2.97373000 | -1.39315600 | 0.02363600  |
| H | -0.87489300 | -1.80023700 | 0.31946500  |
| C | -3.56187200 | 0.93051700  | -0.18332700 |
| H | -1.92925700 | 2.32182500  | -0.04937100 |
| C | -3.94048200 | -0.40767900 | -0.16008200 |
| H | -3.26204700 | -2.43736900 | 0.03838200  |
| H | -4.30546500 | 1.70365100  | -0.33337100 |
| H | -4.98012500 | -0.68168300 | -0.28959500 |
| H | 0.40663400  | 0.67672600  | 1.45693200  |
| H | 0.88795300  | -0.26860200 | -1.25588100 |
| H | 0.33203500  | 1.72267500  | 0.04452900  |

| <b>cat1</b>         | Energy (E)  | Energy(E)+ZPE | Enthalpy (H) | Gibbs free energy (G) |
|---------------------|-------------|---------------|--------------|-----------------------|
| <b>IEFPCM (THF)</b> | -953.446583 | -952.938539   | -952.921202  | -952.979379           |

|   |             |             |             |
|---|-------------|-------------|-------------|
| C | 0.71049400  | 2.56096300  | -0.58938200 |
| C | 0.71048300  | -2.56095900 | -0.58938500 |
| C | 2.01446400  | -1.27784900 | 1.24658300  |
| C | 2.01446900  | 1.27784500  | 1.24658500  |
| C | 2.83596500  | -0.00000400 | 1.52384200  |
| C | 1.54363300  | 1.32446500  | -0.24450600 |
| C | 1.54362800  | -1.32446600 | -0.24450700 |
| B | 0.71346000  | 0.00000100  | -0.24732000 |
| C | 2.80016500  | -1.25425600 | -1.12920100 |
| C | 2.80017000  | 1.25425100  | -1.12920000 |
| C | 3.63367800  | -0.00000400 | -0.84182900 |
| C | -0.85612900 | 0.00000200  | 0.02831500  |
| C | -2.81923300 | 1.24214200  | -0.69857200 |
| C | -3.29952100 | 0.00002300  | -1.44971200 |
| N | -1.35064000 | -1.20486200 | -0.68343100 |
| C | -2.81923400 | -1.24211700 | -0.69860500 |
| C | -3.41114900 | 1.25155400  | 0.72038100  |
| C | -1.38403100 | -0.00003100 | 1.49126400  |
| C | -3.41115800 | -1.25156700 | 0.72034400  |
| C | -2.92339900 | -0.00002000 | 1.46426400  |
| N | -1.35064000 | 1.20488200  | -0.68340700 |
| C | -0.75293600 | 2.43885800  | -0.17144800 |
| C | -0.75295000 | -2.43884000 | -0.17146400 |

|   |             |             |             |
|---|-------------|-------------|-------------|
| C | 4.07594300  | -0.00000600 | 0.62481200  |
| H | 1.16271100  | -1.33081600 | 1.93252400  |
| H | 1.16271700  | 1.33081400  | 1.93252600  |
| H | 2.63390900  | -2.16341700 | 1.44092400  |
| H | 2.63391800  | 2.16341000  | 1.44092600  |
| H | 3.14305300  | -0.00000500 | 2.57382300  |
| H | 3.40951500  | -2.15334000 | -0.96245400 |
| H | 2.50305100  | -1.26324200 | -2.18348500 |
| H | 3.40952400  | 2.15333300  | -0.96245100 |
| H | 2.50305700  | 1.26324100  | -2.18348300 |
| H | 4.51591600  | -0.00000600 | -1.48879900 |
| H | -3.12059600 | 2.14228400  | -1.24185400 |
| H | -4.39125300 | 0.00002400  | -1.51632900 |
| H | -2.87673200 | 0.00003500  | -2.45498900 |
| H | -3.12059700 | -2.14224500 | -1.24191100 |
| H | -4.50476900 | 1.25920700  | 0.66602800  |
| H | -3.10619600 | 2.15581600  | 1.25519200  |
| H | -1.02431600 | 0.87314800  | 2.03925600  |
| H | -1.02433000 | -0.87324600 | 2.03920800  |
| H | -4.50477800 | -1.25920800 | 0.66598600  |
| H | -3.10621400 | -2.15584700 | 1.25513000  |
| H | -3.30929700 | -0.00003500 | 2.48756800  |
| H | -1.31626000 | 3.27234500  | -0.59959600 |
| H | -0.83576300 | 2.54210900  | 0.92008700  |
| H | -1.31627800 | -3.27232400 | -0.59961400 |
| H | -0.83578900 | -2.54208200 | 0.92007200  |
| H | 4.68785400  | -0.88354900 | 0.83385500  |
| H | 4.68785800  | 0.88353400  | 0.83385600  |
| H | 0.73227100  | 2.68618900  | -1.67581000 |
| H | 1.14856700  | 3.46504700  | -0.14869800 |
| H | 1.14854500  | -3.46504400 | -0.14869300 |
| H | 0.73226700  | -2.68618900 | -1.67581200 |

| <b>cat1_bts</b>           | <b>Energy (E)</b>             | <b>Energy(E)+ZPE</b> | <b>Enthalpy (H)</b> | <b>Gibbs free energy (G)</b> |
|---------------------------|-------------------------------|----------------------|---------------------|------------------------------|
| <b>IEFPCM (THF)</b>       | -954.598704                   | -954.074507          | -954.05735          | -954.114831                  |
| Imaginary Frequency (one) | $\nu=1155.7i \text{ cm}^{-1}$ |                      |                     |                              |

|   |             |             |             |
|---|-------------|-------------|-------------|
| C | -0.72554200 | -2.56269100 | -0.53974900 |
| C | -0.72050500 | 2.53909300  | -0.65770200 |
| C | -1.98025000 | 1.30704200  | 1.21165100  |
| C | -1.99958300 | -1.25459300 | 1.30823500  |
| C | -2.79688800 | 0.04404100  | 1.55870900  |
| C | -1.56089100 | -1.33055000 | -0.16715600 |
| C | -1.56238000 | 1.31861200  | -0.27907700 |
| B | -0.70906400 | -0.01143500 | -0.44248200 |

|   |             |             |             |
|---|-------------|-------------|-------------|
| C | -2.84017900 | 1.23594600  | -1.12792600 |
| C | -2.82881800 | -1.28795100 | -1.04074800 |
| C | -3.65596600 | -0.01992700 | -0.78183400 |
| C | 0.84518100  | 0.03512900  | 0.05370200  |
| C | 2.83762200  | -1.18985000 | -0.75492400 |
| C | 3.34227400  | 0.09960800  | -1.40034600 |
| N | 1.39235300  | 1.23779300  | -0.60176300 |
| C | 2.85374400  | 1.28825800  | -0.56803500 |
| C | 3.38955700  | -1.29204600 | 0.67704400  |
| C | 1.35183300  | -0.05584500 | 1.50463400  |
| C | 3.41214300  | 1.20247000  | 0.85980200  |
| C | 2.89375600  | -0.09166700 | 1.50032800  |
| N | 1.35623800  | -1.15027000 | -0.72378800 |
| C | 0.76943700  | -2.42677500 | -0.23187100 |
| C | 0.72332800  | 2.46110300  | -0.15258500 |
| C | -4.06206300 | 0.02435800  | 0.69495200  |
| H | -1.10205100 | 1.36411700  | 1.86262400  |
| H | -1.13532800 | -1.29036000 | 1.97877600  |
| H | -2.59093700 | 2.19526100  | 1.42833300  |
| H | -2.63341100 | -2.11679400 | 1.56078200  |
| H | -3.07820300 | 0.08628500  | 2.61569200  |
| H | -3.45924900 | 2.13049200  | -0.96764600 |
| H | -2.57130000 | 1.21772000  | -2.19081700 |
| H | -3.44722900 | -2.17640800 | -0.84780000 |
| H | -2.54005400 | -1.32143300 | -2.09842500 |
| H | -4.55403700 | -0.04666900 | -1.40696100 |
| H | 3.13267200  | -2.05810500 | -1.34911800 |
| H | 4.43466500  | 0.07769000  | -1.44059100 |
| H | 2.95052100  | 0.18780500  | -2.41506000 |
| H | 3.16654600  | 2.22063800  | -1.04531100 |
| H | 4.48300600  | -1.28994200 | 0.63254600  |
| H | 3.09011400  | -2.23345100 | 1.14348300  |
| H | 0.95400800  | -0.92549300 | 2.02786400  |
| H | 1.01103200  | 0.81599900  | 2.06621600  |
| H | 4.50696000  | 1.21082900  | 0.83988000  |
| H | 3.08658500  | 2.06931800  | 1.44203000  |
| H | 3.26069100  | -0.17677700 | 2.52634300  |
| H | 1.32021100  | -3.23311000 | -0.72189300 |
| H | 0.93816400  | -2.53042400 | 0.84096400  |
| H | 1.28963900  | 3.30329000  | -0.55923200 |
| H | 0.74086100  | 2.57771000  | 0.94223700  |
| H | -4.66445000 | 0.91720300  | 0.89323000  |
| H | -4.67312400 | -0.84981100 | 0.94405700  |
| H | 0.42991700  | -0.65830000 | -1.66217700 |
| H | -0.37263500 | -0.15814900 | -1.83795100 |
| H | -0.68214200 | 2.60051200  | -1.75036300 |
| H | -1.17704800 | 3.46870800  | -0.29236800 |
| H | -0.83118600 | -2.72236200 | -1.61844100 |

H -1.09288100 -3.47405800 -0.05225900

| <b>cat1_c</b>       | <b>Energy (E)</b> | <b>Energy(E)+ZPE</b> | <b>Enthalpy (H)</b> | <b>Gibbs free energy (G)</b> |
|---------------------|-------------------|----------------------|---------------------|------------------------------|
| <b>IEFPCM (THF)</b> | -954.636055       | -954.104729          | -954.087472         | -954.145083                  |

C -0.72962400 -2.54057000 -0.61988300  
 C -0.73852700 2.52856800 -0.69653100  
 C -1.95580100 1.30468900 1.22810900  
 C -1.95350100 -1.27120200 1.27944200  
 C -2.74253200 0.02276600 1.58294800  
 C -1.56432800 -1.32215500 -0.20730500  
 C -1.57906300 1.32262300 -0.26452400  
 B -0.73790200 0.00155100 -0.61288600  
 C -2.88581400 1.25163800 -1.07195200  
 C -2.86777200 -1.28948500 -1.02604600  
 C -3.68182100 -0.01884200 -0.72349100  
 C 0.81408500 0.05622100 -0.04203200  
 C 2.91659800 -1.21107900 -0.66292200  
 C 3.43204600 0.07317300 -1.31350400  
 N 1.41897900 1.22851400 -0.68512400  
 C 2.87648000 1.28282600 -0.55051500  
 C 3.35324800 -1.26867800 0.80193800  
 C 1.26477400 -0.02651000 1.43220300  
 C 3.35379600 1.23448800 0.90836100  
 C 2.79975700 -0.04453300 1.54554300  
 N 1.41690600 -1.17833000 -0.73555300  
 C 0.75916400 -2.45128100 -0.26576800  
 C 0.73298200 2.46222400 -0.26418600  
 C -4.03866300 0.00423400 0.76609600  
 H -1.06880400 1.37423500 1.86475100  
 H -1.07666000 -1.32104900 1.93116500  
 H -2.58291000 2.17424700 1.47780200  
 H -2.58534900 -2.13286800 1.54564100  
 H -2.98718400 0.04173100 2.65034600  
 H -3.51518400 2.13332700 -0.87493600  
 H -2.64878500 1.25247900 -2.14158200  
 H -3.48724400 -2.17354900 -0.80827900  
 H -2.62318000 -1.31594300 -2.09395900  
 H -4.60160200 -0.03886100 -1.31761300  
 H 3.24582300 -2.09630600 -1.21254000  
 H 4.52443000 0.06164600 -1.28495500  
 H 3.11335400 0.12872400 -2.35714900  
 H 3.22125900 2.19943600 -1.03560200  
 H 4.44669800 -1.26898300 0.82376600  
 H 3.02406800 -2.19704000 1.27419400  
 H 0.84080800 -0.88364700 1.95268400  
 H 0.87894600 0.85024600 1.95108300

|   |             |             |             |
|---|-------------|-------------|-------------|
| H | 4.44806400  | 1.24901900  | 0.95076900  |
| H | 2.99242600  | 2.11147000  | 1.45103800  |
| H | 3.09109500  | -0.10070500 | 2.59728500  |
| H | 1.31939700  | -3.26960400 | -0.72408500 |
| H | 0.90357000  | -2.50841500 | 0.80854000  |
| H | 1.27706600  | 3.29329800  | -0.72196100 |
| H | 0.79698500  | 2.61397800  | 0.82447300  |
| H | -4.63919400 | 0.89108100  | 0.99559400  |
| H | -4.63518900 | -0.87726200 | 1.02627100  |
| H | 1.12148200  | -1.01849600 | -1.70594100 |
| H | -0.53447500 | -0.04394700 | -1.84224300 |
| H | -0.75588700 | 2.56811100  | -1.79033100 |
| H | -1.15283800 | 3.47793500  | -0.32770300 |
| H | -1.09592900 | -3.48126100 | -0.18548100 |
| H | -0.80965100 | -2.64677100 | -1.70775300 |

| <b>cat1_im2d</b>    | <b>Energy (E)</b> | <b>Energy(E)+ZPE</b> | <b>Enthalpy (H)</b> | <b>Gibbs free energy (G)</b> |
|---------------------|-------------------|----------------------|---------------------|------------------------------|
| <b>IEFPCM (THF)</b> | -1437.65409       | -1436.883175         | -1436.852179        | -1436.94196                  |

|   |             |             |             |
|---|-------------|-------------|-------------|
| C | 2.39047400  | 1.22575900  | 1.95386700  |
| C | 0.83619400  | -0.82401000 | -2.40985100 |
| C | 3.27110700  | -1.22195900 | -1.64374500 |
| C | 4.06987400  | -0.19319200 | 0.57939600  |
| C | 4.44698700  | -0.58878200 | -0.86673900 |
| C | 2.89186900  | 0.79493900  | 0.57087200  |
| C | 2.07626500  | -0.25378600 | -1.71466200 |
| B | 1.64360500  | 0.16141600  | -0.22655100 |
| C | 2.55939500  | 1.02451200  | -2.41962200 |
| C | 3.33895500  | 2.03647700  | -0.22296400 |
| C | 3.73763300  | 1.66293000  | -1.66175700 |
| C | 0.83267400  | -1.03618400 | 0.57210000  |
| C | -0.69686400 | -1.05023100 | 2.59203100  |
| C | -1.86225200 | -1.30683300 | 1.63953900  |
| C | -1.36467100 | -2.12207800 | 0.43819500  |
| C | -0.09991300 | -2.37142200 | 3.07579800  |
| C | 1.42922700  | -2.36130600 | 1.09382200  |
| C | -0.80771700 | -3.46589400 | 0.93257300  |
| C | 0.37814100  | -3.18084900 | 1.86246200  |
| N | 0.33607400  | -0.28159900 | 1.81474800  |
| C | 1.48000400  | 0.21386800  | 2.65990100  |
| C | 0.04003300  | -1.82760800 | -1.56418300 |
| C | 4.90268300  | 0.66900300  | -1.61378600 |
| H | 2.99046400  | -2.16822900 | -1.17251800 |
| H | 3.83865600  | -1.09489900 | 1.15340300  |
| H | 3.62233800  | -1.47488900 | -2.65611100 |
| H | 4.95326200  | 0.25876100  | 1.05682600  |
| H | 5.27344800  | -1.30648800 | -0.82917400 |
| H | 2.87364600  | 0.80804900  | -3.45245400 |

|   |             |             |             |
|---|-------------|-------------|-------------|
| H | 1.73068700  | 1.74073200  | -2.47463800 |
| H | 4.19215800  | 2.52872000  | 0.26927400  |
| H | 2.51714700  | 2.76201800  | -0.25250600 |
| H | 4.05373000  | 2.56935800  | -2.18887300 |
| H | -1.00079500 | -0.41497000 | 3.42785100  |
| H | -2.64073300 | -1.85393800 | 2.17757200  |
| H | -2.28211200 | -0.35836600 | 1.29915500  |
| H | -2.19546600 | -2.27426900 | -0.25551700 |
| H | -0.88333300 | -2.91131100 | 3.61491700  |
| H | 0.71748300  | -2.20325700 | 3.78117400  |
| H | 2.30836100  | -2.20425400 | 1.71834400  |
| H | 1.77655900  | -2.93856900 | 0.23796800  |
| H | -1.58687400 | -4.02669400 | 1.45940100  |
| H | -0.48181200 | -4.07552700 | 0.08608600  |
| H | 0.82275100  | -4.11799000 | 2.20673900  |
| H | 1.02777500  | 0.65628000  | 3.55075700  |
| H | 2.04542400  | -0.65920300 | 2.97119900  |
| H | -0.88520100 | -2.08605300 | -2.08554000 |
| H | 0.61813300  | -2.76006600 | -1.47934200 |
| H | 5.21714900  | 0.40793000  | -2.63007800 |
| H | 5.76297000  | 1.11904000  | -1.10584900 |
| C | -2.49399900 | 1.55193100  | -0.76783400 |
| N | -2.70738500 | 2.12661500  | 0.34364200  |
| H | 0.75726800  | 1.03691400  | -0.29286200 |
| H | -0.11874500 | 0.53088300  | 1.38316200  |
| C | -2.00831200 | 3.36565400  | 0.70407300  |
| N | -0.35591400 | -1.30492700 | -0.24627800 |
| C | -0.93462500 | 3.83815100  | -0.27789600 |
| H | -1.36542900 | 4.08732300  | -1.25059400 |
| H | -0.46477400 | 4.74115600  | 0.11680100  |
| H | -0.15929000 | 3.08105000  | -0.41692500 |
| C | -1.38402800 | 3.13779900  | 2.08487900  |
| H | -1.02635100 | 4.08147300  | 2.50155500  |
| H | -2.12366200 | 2.70590400  | 2.76106100  |
| H | -0.52734000 | 2.46402000  | 2.01219900  |
| C | -3.10643800 | 4.42991000  | 0.82653800  |
| H | -3.58408500 | 4.59031900  | -0.14158600 |
| H | -3.86747000 | 4.10356100  | 1.53651500  |
| H | -2.67967700 | 5.37533200  | 1.16817800  |
| C | -3.28462800 | 0.37137800  | -1.17824200 |
| C | -4.35133900 | -0.08613700 | -0.39781700 |
| C | -2.97844400 | -0.28388700 | -2.37088100 |
| C | -5.07904600 | -1.19987600 | -0.79359000 |
| H | -4.58857500 | 0.45017600  | 0.51214400  |
| C | -3.71204900 | -1.39748500 | -2.77145500 |
| H | -2.15641900 | 0.07445400  | -2.97998000 |
| C | -4.75927000 | -1.86041300 | -1.98052200 |
| H | -5.90278000 | -1.55092200 | -0.18428500 |



|   |             |             |             |
|---|-------------|-------------|-------------|
| H | -3.46529000 | -1.90194500 | -3.69732700 |
| H | -5.33080300 | -2.72673500 | -2.29000100 |
| H | -1.73963000 | 1.88482400  | -1.48558900 |
| H | 1.82524200  | 2.15612300  | 1.82591100  |
| H | 3.20497600  | 1.45117900  | 2.65659200  |
| H | 1.07966600  | -1.30656600 | -3.36764300 |
| H | 0.17236700  | 0.01958900  | -2.63042300 |

| <b>cat1_im2ets</b>        | <b>Energy (E)</b> | <b>Energy(E)+ZPE</b>          | <b>Enthalpy (H)</b> | <b>Gibbs free energy (G)</b> |
|---------------------------|-------------------|-------------------------------|---------------------|------------------------------|
| <b>IEFPCM (THF)</b>       | -1437.619623      | -1436.849804                  | -1436.820313        | -1436.904549                 |
| Imaginary Frequency (one) |                   | $\nu=1454.2i \text{ cm}^{-1}$ |                     |                              |

|   |             |             |             |
|---|-------------|-------------|-------------|
| C | 0.34819600  | -0.45306200 | -2.27435500 |
| C | 2.96127300  | -0.02358200 | 2.04251700  |
| C | 4.08112900  | 0.70827600  | -0.17227300 |
| C | 2.75565700  | 0.48657300  | -2.37084400 |
| C | 4.14043000  | 0.41026600  | -1.68760300 |
| C | 1.77577200  | -0.50215300 | -1.71604200 |
| C | 3.13750200  | -0.27588200 | 0.54058400  |
| B | 1.67323300  | -0.22099800 | -0.12846900 |
| C | 3.68675600  | -1.69122500 | 0.29153300  |
| C | 2.37790400  | -1.90710800 | -1.88731500 |
| C | 3.76063100  | -2.00398400 | -1.21525800 |
| C | 0.77432400  | 1.08462600  | 0.29293800  |
| C | -1.58909800 | 1.77036300  | 0.18304900  |
| C | -1.65140100 | 1.68029000  | 1.71342700  |
| C | -0.27365200 | 2.01991900  | 2.29832200  |
| C | -1.23004600 | 3.21154000  | -0.20697500 |
| C | 1.16577800  | 2.53601200  | -0.11189400 |
| C | 0.07034300  | 3.46990500  | 1.92212600  |
| C | 0.13595800  | 3.55862400  | 0.39318000  |
| N | -0.59100500 | 0.77313200  | -0.27572800 |
| C | -0.47641700 | 0.73257100  | -1.75522800 |
| C | 2.01088400  | 1.13302100  | 2.39846200  |
| C | 4.70463400  | -1.00042700 | -1.88476500 |
| H | 3.77014200  | 1.74420500  | -0.01833500 |
| H | 2.38501200  | 1.51293600  | -2.32234200 |
| H | 5.10209200  | 0.62866400  | 0.23433100  |
| H | 2.88502400  | 0.25382900  | -3.44031400 |
| H | 4.80818000  | 1.13591000  | -2.16489100 |
| H | 4.69262400  | -1.80771000 | 0.72614400  |
| H | 3.03565400  | -2.42308300 | 0.78547500  |
| H | 2.48377000  | -2.16356700 | -2.95407700 |
| H | 1.70473700  | -2.65185700 | -1.44562000 |
| H | 4.15284700  | -3.01814800 | -1.35188200 |
| H | -2.55675700 | 1.50337400  | -0.25388700 |

|   |             |             |             |
|---|-------------|-------------|-------------|
| H | -2.39943200 | 2.38500700  | 2.08915500  |
| H | -1.94042800 | 0.67555500  | 2.02818400  |
| H | -0.30132800 | 1.90641900  | 3.38744500  |
| H | -2.00546100 | 3.88513300  | 0.17419100  |
| H | -1.21137300 | 3.32413400  | -1.29406100 |
| H | 1.29078700  | 2.65053300  | -1.18660400 |
| H | 2.13727800  | 2.77462300  | 0.31855100  |
| H | -0.69090900 | 4.14963700  | 2.32143200  |
| H | 1.02895600  | 3.76186500  | 2.35853900  |
| H | 0.42996700  | 4.56770000  | 0.08923800  |
| H | -1.49030700 | 0.70397500  | -2.15788000 |
| H | -0.03295000 | 1.65341600  | -2.14126700 |
| H | 1.84524000  | 1.13219900  | 3.48167500  |
| H | 2.51509900  | 2.08320200  | 2.17017600  |
| H | 5.70476500  | -1.07085700 | -1.44268900 |
| H | 4.79722800  | -1.22425600 | -2.95366800 |
| C | -3.07818700 | -1.60526400 | 0.54367300  |
| N | -1.82264200 | -1.61984300 | 0.78720900  |
| H | 1.00617100  | -1.13985200 | 0.35985400  |
| H | -1.17992300 | -0.83747100 | 0.32981800  |
| C | -1.22618600 | -2.59231600 | 1.76765300  |
| N | 0.68397000  | 1.04182000  | 1.76915800  |
| C | -2.29552400 | -3.43903900 | 2.45612400  |
| H | -2.84612200 | -4.07722000 | 1.76062300  |
| H | -1.77416000 | -4.09278600 | 3.15504800  |
| H | -2.99473300 | -2.83476000 | 3.03902700  |
| C | -0.45403500 | -1.79696700 | 2.81730200  |
| H | 0.15149500  | -2.49154100 | 3.40246300  |
| H | 0.18659100  | -1.04526400 | 2.35393200  |
| H | -1.14991900 | -1.29121100 | 3.49248400  |
| C | -0.31214400 | -3.51529900 | 0.95422400  |
| H | -0.89044700 | -4.05835600 | 0.20283100  |
| H | 0.47576600  | -2.94194700 | 0.47077200  |
| H | 0.14128600  | -4.23857500 | 1.63413000  |
| C | -3.75451400 | -0.84368500 | -0.50761400 |
| C | -3.28340900 | -0.86559300 | -1.82008900 |
| C | -4.95300200 | -0.19029600 | -0.19625500 |
| C | -3.99387900 | -0.20036400 | -2.81402600 |
| H | -2.37709200 | -1.40794400 | -2.05776800 |
| C | -5.63725300 | 0.49918700  | -1.18567100 |
| H | -5.32751200 | -0.20374000 | 0.82068600  |
| C | -5.15713600 | 0.49175200  | -2.49541300 |
| H | -3.63081300 | -0.21808200 | -3.83339000 |
| H | -6.54812700 | 1.03046000  | -0.94307800 |
| H | -5.70038700 | 1.01755600  | -3.27014300 |
| H | -3.71530900 | -2.23689100 | 1.15213100  |
| H | 3.91946100  | 0.16773300  | 2.54859400  |
| H | 2.55211000  | -0.94028600 | 2.48254100  |

H -0.14772500 -1.38529000 -1.96593600  
 H 0.32279500 -0.42822300 -3.37474300

| <b>cat1_im2f</b>    | <b>Energy (E)</b> | <b>Energy(E)+ZPE</b> | <b>Enthalpy (H)</b> | <b>Gibbs free energy (G)</b> |
|---------------------|-------------------|----------------------|---------------------|------------------------------|
| <b>IEFPCM (THF)</b> | -1437.622017      | -1436.852341         | -1436.821912        | -1436.909216                 |

C -0.47831100 -0.13199200 -2.41630100  
 C -2.76519800 0.49268800 2.06223900  
 C -4.05693700 -0.66144600 0.14695400  
 C -2.90200700 -0.97572300 -2.13072800  
 C -4.22856000 -0.70094500 -1.38776800  
 C -1.85481100 0.09554200 -1.78239900  
 C -3.04245900 0.42064800 0.55668100  
 B -1.63385700 0.16395800 -0.18401900  
 C -3.58623400 1.76386200 0.04112800  
 C -2.43838900 1.45163100 -2.21475100  
 C -3.76531300 1.74215900 -1.48861900  
 C -0.73475600 -1.05193200 0.45005100  
 C 1.59132400 -1.83322900 0.32619800  
 C 1.77938900 -1.40129200 1.78603200  
 C 0.44848500 -1.54872200 2.53520800  
 C 1.17844700 -3.31276000 0.30470700  
 C -1.19096400 -2.54105600 0.41603700  
 C 0.04553000 -3.03215500 2.52389300  
 C -0.14382400 -3.46118100 1.06464400  
 N 0.58027600 -0.93529000 -0.27053900  
 C 0.35922900 -1.20664600 -1.70749600  
 C -1.80395500 -0.58366200 2.59792200  
 C -4.77750400 0.65170400 -1.85255100  
 H -3.75467700 -1.64850400 0.50320900  
 H -2.54894100 -1.97833600 -1.87964800  
 H -5.04097700 -0.45680100 0.59881500  
 H -3.10626700 -0.98009800 -3.21384300  
 H -4.94545300 -1.48914700 -1.64356700  
 H -4.55604700 2.00213600 0.50729900  
 H -2.89246100 2.56759000 0.31750200  
 H -2.61648700 1.47644200 -3.30230300  
 H -1.71673900 2.24727200 -1.98998100  
 H -4.14630500 2.71554900 -1.81846400  
 H 2.52870100 -1.70346300 -0.22651400  
 H 2.54454100 -2.02522700 2.25828600  
 H 2.10640900 -0.36032500 1.83517000  
 H 0.56612900 -1.19547800 3.56597700  
 H 1.96570500 -3.91429400 0.77320300  
 H 1.07023900 -3.66704200 -0.72404000  
 H -1.39378500 -2.88536200 -0.59663100

|   |             |             |             |
|---|-------------|-------------|-------------|
| H | -2.13202000 | -2.64918300 | 0.95349100  |
| H | 0.82275600  | -3.63262700 | 3.01029700  |
| H | -0.88068500 | -3.18270400 | 3.08454700  |
| H | -0.48268000 | -4.50091100 | 1.02231200  |
| H | 1.34227300  | -1.29056500 | -2.17754200 |
| H | -0.12323100 | -2.17584800 | -1.86844800 |
| H | -1.55486100 | -0.34612000 | 3.63880600  |
| H | -2.33847600 | -1.54406000 | 2.62710500  |
| H | -5.73924500 | 0.85423400  | -1.36790500 |
| H | -4.94699800 | 0.63915000  | -2.93538200 |
| C | 3.07167700  | 1.75558700  | 0.21469800  |
| N | 1.81535000  | 1.87451200  | 0.43263000  |
| H | -0.90150800 | 1.14635600  | 0.03482100  |
| H | 1.15913800  | 1.11459500  | 0.09411600  |
| C | 1.22467500  | 2.98393100  | 1.25232300  |
| N | -0.52793300 | -0.67782600 | 1.86971200  |
| C | 2.29473900  | 3.96507000  | 1.72091300  |
| H | 2.81332700  | 4.44857000  | 0.88933100  |
| H | 1.78265700  | 4.74308600  | 2.28680200  |
| H | 3.02102600  | 3.50409700  | 2.39416500  |
| C | 0.53705000  | 2.33533300  | 2.45171500  |
| H | -0.08262700 | 3.08187600  | 2.95130500  |
| H | -0.07509100 | 1.49046300  | 2.12955200  |
| H | 1.28541300  | 1.96858200  | 3.15952500  |
| C | 0.23163700  | 3.71418900  | 0.34335500  |
| H | 0.74873900  | 4.15842700  | -0.51023700 |
| H | -0.53758900 | 3.02927700  | -0.00933900 |
| H | -0.24034900 | 4.51224600  | 0.91856600  |
| C | 3.71010800  | 0.78811700  | -0.66692800 |
| C | 3.13985500  | 0.43216800  | -1.88990000 |
| C | 4.96508400  | 0.28893000  | -0.29539100 |
| C | 3.81891600  | -0.44321400 | -2.72890700 |
| H | 2.18500300  | 0.84851300  | -2.18261700 |
| C | 5.61829300  | -0.61323700 | -1.12075800 |
| H | 5.40964200  | 0.59150000  | 0.64570800  |
| C | 5.04490600  | -0.97451900 | -2.33980700 |
| H | 3.38370800  | -0.71593100 | -3.68149900 |
| H | 6.57505000  | -1.02323500 | -0.82566700 |
| H | 5.56300500  | -1.66504600 | -2.99306800 |
| H | 3.72839400  | 2.45190100  | 0.72310900  |
| H | 0.05900700  | 0.82583200  | -2.35531600 |
| H | -0.54031100 | -0.39488100 | -3.48363100 |
| H | -3.68875100 | 0.43639900  | 2.65821800  |
| H | -2.32359500 | 1.47444900  | 2.26749800  |

| <b>cat1_im2gts</b>        | Energy (E)   | Energy(E)+ZPE                  | Enthalpy (H) | Gibbs free energy (G) |
|---------------------------|--------------|--------------------------------|--------------|-----------------------|
| <b>IEFPCM (THF)</b>       | -1437.614996 | -1436.847811                   | -1436.818489 | -1436.901291          |
| Imaginary Frequency (one) |              | $\nu = 384.1i \text{ cm}^{-1}$ |              |                       |

|   |             |             |             |
|---|-------------|-------------|-------------|
| C | -1.46935700 | 0.85494500  | 2.47845000  |
| C | -0.71192500 | -1.65906700 | -1.92556000 |
| C | -3.01673500 | -1.67332000 | -0.80771000 |
| C | -3.37867100 | -0.42622900 | 1.38038000  |
| C | -3.76058500 | -1.65584800 | 0.53952000  |
| C | -1.86189100 | -0.38772400 | 1.67242000  |
| C | -1.48681500 | -1.68220500 | -0.60326000 |
| B | -1.07495100 | -0.40257600 | 0.27371000  |
| C | -1.15749900 | -2.93795600 | 0.22550000  |
| C | -1.51798500 | -1.68723500 | 2.42189000  |
| C | -1.88973900 | -2.92535400 | 1.58129000  |
| C | -0.98737600 | 1.01499300  | -0.50751000 |
| C | -0.04191000 | 3.23853100  | -0.16969000 |
| C | 0.95966900  | 2.94578700  | -1.29208000 |
| C | 0.30757700  | 2.01458900  | -2.32052000 |
| C | -1.26301800 | 3.95016400  | -0.77550000 |
| C | -2.26731400 | 1.68684700  | -1.09322000 |
| C | -0.91354100 | 2.72404300  | -2.92724000 |
| C | -1.91033000 | 3.00856600  | -1.79712000 |
| N | -0.37052400 | 1.95544200  | 0.47123000  |
| C | -1.23100300 | 2.13136400  | 1.65138000  |
| C | -0.55311000 | -0.26038800 | -2.54595000 |
| C | -3.40026900 | -2.91948900 | 1.32618000  |
| H | -3.33227200 | -0.81981900 | -1.41151000 |
| H | -3.70425800 | 0.48262200  | 0.87032000  |
| H | -3.31225700 | -2.57504900 | -1.36523000 |
| H | -3.92761100 | -0.46249800 | 2.33369000  |
| H | -4.83951500 | -1.63951500 | 0.35299000  |
| H | -1.43405100 | -3.85151500 | -0.32230000 |
| H | -0.07802900 | -2.98524900 | 0.39689000  |
| H | -2.04739500 | -1.73686300 | 3.38545000  |
| H | -0.44352500 | -1.70601800 | 2.64875000  |
| H | -1.62097100 | -3.82819500 | 2.14064000  |
| H | 0.42479200  | 3.88524900  | 0.58178000  |
| H | 1.27008200  | 3.87850600  | -1.77164000 |
| H | 1.84184800  | 2.46069500  | -0.86804000 |
| H | 1.02909600  | 1.77103700  | -3.11030000 |
| H | -0.94211500 | 4.88090300  | -1.25615000 |
| H | -1.97945700 | 4.22050600  | 0.00421000  |
| H | -2.99814400 | 1.89069000  | -0.31166000 |
| H | -2.76735600 | 1.02817900  | -1.80171000 |
| H | -0.59934800 | 3.65679200  | -3.40834000 |
| H | -1.37542300 | 2.10181500  | -3.69770000 |

|   |             |             |             |
|---|-------------|-------------|-------------|
| H | -2.81614900 | 3.46632900  | -2.20565000 |
| H | -0.74219100 | 2.87346300  | 2.29386000  |
| H | -2.20801200 | 2.56263700  | 1.39642000  |
| H | 0.15891900  | -0.32822000 | -3.37653000 |
| H | -1.51135900 | 0.03372500  | -2.99434000 |
| H | -3.68792100 | -3.81164800 | 0.75948000  |
| H | -3.94472900 | -2.93970800 | 2.27668000  |
| N | -0.03692700 | 0.76775000  | -1.62453000 |
| H | 2.88708300  | 0.86221200  | 0.16134000  |
| N | 2.57494200  | 0.36710200  | 0.98262000  |
| C | 2.95193300  | 0.99849100  | 2.26176000  |
| C | 1.97861800  | -0.79748600 | 0.78014000  |
| H | 0.27577900  | -0.59740000 | 0.60020000  |
| C | 2.52129800  | 2.46223300  | 2.20501000  |
| H | 1.43598800  | 2.51486600  | 2.14274000  |
| H | 2.87653000  | 2.98910200  | 3.09229000  |
| H | 2.94313900  | 2.95601100  | 1.32556000  |
| C | 4.47593300  | 0.88709700  | 2.38960000  |
| H | 4.78308000  | -0.15979400 | 2.38657000  |
| H | 4.97552500  | 1.39934500  | 1.56414000  |
| H | 4.80381500  | 1.34743600  | 3.32365000  |
| C | 2.28460100  | 0.29206300  | 3.43314000  |
| H | 2.46485300  | 0.87308300  | 4.33804000  |
| H | 1.21286100  | 0.22177700  | 3.27676000  |
| H | 2.69426800  | -0.70748800 | 3.59327000  |
| C | 2.29179600  | -1.54287700 | -0.45579000 |
| C | 2.42750100  | -2.92894700 | -0.36795000 |
| C | 2.55765800  | -0.89764700 | -1.66705000 |
| C | 2.80501900  | -3.66955800 | -1.48309000 |
| H | 2.22779000  | -3.42920600 | 0.57222000  |
| C | 2.93644500  | -1.63983900 | -2.77654000 |
| H | 2.37817100  | 0.16506300  | -1.76098000 |
| C | 3.05807100  | -3.02589900 | -2.68910000 |
| H | 2.89819600  | -4.74522800 | -1.40820000 |
| H | 3.11868700  | -1.13843900 | -3.71874000 |
| H | 3.34553900  | -3.60035000 | -3.56055000 |
| H | 1.73797600  | -1.37791500 | 1.65926000  |
| H | 0.28123400  | -2.06706000 | -1.74572000 |
| H | -1.18037700 | -2.30852600 | -2.67867000 |
| H | -0.56207800 | 0.62619200  | 3.03745000  |
| H | -2.23068600 | 1.09241700  | 3.23473000  |

| <b>cat1_am2</b>     | <b>Energy (E)</b> | <b>Energy(E)+ZPE</b> | <b>Enthalpy (H)</b> | <b>Gibbs free energy (G)</b> |
|---------------------|-------------------|----------------------|---------------------|------------------------------|
| <b>IEFPCM (THF)</b> | -1437.680728      | -1436.908363         | -1436.877144        | -1436.967201                 |

|   |             |             |             |
|---|-------------|-------------|-------------|
| C | -0.38595700 | -1.83515000 | 2.21902500  |
| C | -0.66391900 | -0.16804300 | -2.61416000 |

|   |             |             |             |
|---|-------------|-------------|-------------|
| C | -1.40147200 | -2.59272200 | -2.05050900 |
| C | -1.26032000 | -3.42075900 | 0.36199500  |
| C | -1.10453900 | -3.79439600 | -1.12802500 |
| C | -0.27584800 | -2.26877400 | 0.75506900  |
| C | -0.42666100 | -1.40785100 | -1.74696800 |
| B | -0.80044000 | -1.19176100 | -0.24642400 |
| C | 1.00940200  | -1.92645300 | -1.93126000 |
| C | 1.14988800  | -2.75123200 | 0.43761500  |
| C | 1.30205900  | -3.13840500 | -1.03818300 |
| C | -1.89720000 | -0.11660900 | 0.18840200  |
| C | -2.36419000 | 1.38009900  | 2.05331600  |
| C | -2.08143900 | 2.57325100  | 1.13984600  |
| C | -2.47936900 | 2.20323900  | -0.28999100 |
| C | -3.86496900 | 1.05018800  | 2.02240200  |
| C | -3.40044100 | -0.51168000 | 0.12470900  |
| C | -3.98096000 | 1.88005500  | -0.33854200 |
| C | -4.25523500 | 0.68313800  | 0.58383100  |
| N | -1.53971600 | 0.25928400  | 1.57782000  |
| C | -1.55529600 | -0.88996400 | 2.48761800  |
| C | -1.80738800 | 0.71508200  | -2.11796800 |
| C | 0.33006400  | -4.27284100 | -1.37651800 |
| H | -2.44770700 | -2.28759100 | -1.94172800 |
| H | -2.29966200 | -3.14602000 | 0.57030100  |
| H | -1.26598400 | -2.89007000 | -3.09868500 |
| H | -1.03216500 | -4.29393100 | 0.98711800  |
| H | -1.80675000 | -4.59985700 | -1.36306100 |
| H | 1.16261600  | -2.19561100 | -2.98589400 |
| H | 1.71082900  | -1.12164200 | -1.69555300 |
| H | 1.38548000  | -3.61656400 | 1.07286700  |
| H | 1.86939700  | -1.96688800 | 0.68738000  |
| H | 2.33066400  | -3.46808900 | -1.21244800 |
| H | -2.04605200 | 1.61258000  | 3.07339600  |
| H | -2.65357200 | 3.44441900  | 1.47131100  |
| H | -1.01787700 | 2.81429100  | 1.17549400  |
| H | -2.24596700 | 3.03089000  | -0.96749000 |
| H | -4.44119100 | 1.91593300  | 2.36467600  |
| H | -4.08865400 | 0.22232800  | 2.70116200  |
| H | -3.60218700 | -1.37434600 | 0.76214800  |
| H | -3.68796100 | -0.80665800 | -0.88579400 |
| H | -4.55529100 | 2.75243000  | -0.01081300 |
| H | -4.29203200 | 1.65227400  | -1.36191000 |
| H | -5.31440000 | 0.41483200  | 0.54078700  |
| H | -1.47066000 | -0.49527400 | 3.50352000  |
| H | -2.50061100 | -1.45029700 | 2.45329400  |
| H | -1.79918300 | 1.65724600  | -2.67357800 |
| H | -2.77079700 | 0.23706400  | -2.33857800 |
| H | 0.44602400  | -4.57239200 | -2.42345300 |
| H | 0.54272400  | -5.14971700 | -0.75614000 |

|   |             |             |             |
|---|-------------|-------------|-------------|
| C | 1.72642900  | 1.59037100  | 0.83025700  |
| N | 1.42237400  | 1.96269300  | -0.54325100 |
| H | 0.42716600  | 1.81951500  | -0.69829500 |
| C | 1.80915200  | 3.30494000  | -0.99691900 |
| N | -1.65321400 | 1.05416700  | -0.69686000 |
| C | 1.45538100  | 3.37424000  | -2.48334600 |
| H | 0.38337300  | 3.20595800  | -2.62658500 |
| H | 1.70518800  | 4.35290900  | -2.89868900 |
| H | 1.99964700  | 2.60350500  | -3.03177400 |
| C | 1.05710500  | 4.42464600  | -0.25745700 |
| H | -0.01923200 | 4.33055300  | -0.42392500 |
| H | 1.24236900  | 4.39008600  | 0.81831000  |
| H | 1.37232400  | 5.40685500  | -0.61796500 |
| C | 3.31614000  | 3.50491400  | -0.82755500 |
| H | 3.61512800  | 3.43889400  | 0.22056700  |
| H | 3.86840500  | 2.74854100  | -1.38608500 |
| H | 3.60287300  | 4.49144500  | -1.19814400 |
| C | 2.88307700  | 0.61530100  | 0.97371800  |
| C | 3.58040900  | 0.12289600  | -0.12640900 |
| C | 3.23114900  | 0.15713800  | 2.24753200  |
| C | 4.59819500  | -0.81518700 | 0.03929400  |
| H | 3.29704700  | 0.47608000  | -1.10883000 |
| C | 4.24349800  | -0.78053500 | 2.41711300  |
| H | 2.69432200  | 0.53538200  | 3.11230600  |
| C | 4.93079300  | -1.27338100 | 1.30953500  |
| H | 5.12778400  | -1.19099400 | -0.82819000 |
| H | 4.49537900  | -1.12936500 | 3.41126800  |
| H | 5.71776000  | -2.00609200 | 1.43825300  |
| H | 1.93282900  | 2.46177600  | 1.46634600  |
| H | 0.83522400  | 1.11391100  | 1.25535100  |
| H | 0.25226200  | 0.42900300  | -2.59101200 |
| H | -0.84679300 | -0.44833300 | -3.65884800 |
| H | 0.53821800  | -1.30948900 | 2.47977200  |
| H | -0.45944800 | -2.70678200 | 2.88116800  |

| <b>cat2</b>         | <b>Energy (E)</b> | <b>Energy(E)+ZPE</b> | <b>Enthalpy (H)</b> | <b>Gibbs free energy (G)</b> |
|---------------------|-------------------|----------------------|---------------------|------------------------------|
| <b>IEFPCM (THF)</b> | -1350.558314      | -1350.081523         | -1350.061101        | -1350.125978                 |

|   |             |             |             |
|---|-------------|-------------|-------------|
| C | -0.56159900 | -2.52776700 | -0.42001400 |
| C | -0.56166000 | 2.52775300  | -0.41999500 |
| F | -0.62284200 | -2.74798800 | -1.77104100 |
| F | -1.07568300 | -3.66322300 | 0.16732700  |
| F | -1.07568700 | 3.66316100  | 0.16750600  |
| F | -0.62308600 | 2.74814300  | -1.77098600 |
| C | -1.81128200 | 1.28021900  | 1.43240200  |
| C | -1.81127000 | -1.28030500 | 1.43237700  |
| C | -2.61814100 | -0.00005000 | 1.73473500  |
| C | -1.40305000 | -1.31600300 | -0.07917200 |



|   |             |             |             |
|---|-------------|-------------|-------------|
| C | -1.40307800 | 1.31595900  | -0.07915000 |
| B | -0.56099100 | -0.00001500 | -0.09853500 |
| C | -2.68788700 | 1.25636200  | -0.92623100 |
| C | -2.68785100 | -1.25641400 | -0.92625800 |
| C | -3.50287900 | -0.00003400 | -0.59645500 |
| C | 1.01069100  | 0.00000500  | 0.16690700  |
| C | 2.95672100  | -1.24278000 | -0.61764800 |
| C | 3.41290500  | -0.00006100 | -1.38269900 |
| N | 1.48853300  | 1.20146000  | -0.55661800 |
| C | 2.95668800  | 1.24274100  | -0.61780100 |
| C | 3.58229800  | -1.25216300 | 0.78595600  |
| C | 1.57501800  | 0.00006900  | 1.61490400  |
| C | 3.58228600  | 1.25227900  | 0.78580000  |
| C | 3.11380200  | 0.00009800  | 1.54201500  |
| N | 1.48857400  | -1.20149700 | -0.55649100 |
| C | 0.90253700  | -2.42768500 | -0.03684400 |
| C | 0.90253600  | 2.42771000  | -0.03703100 |
| C | -3.89144200 | -0.00001000 | 0.88454100  |
| H | -0.93445100 | 1.33382800  | 2.08486800  |
| H | -0.93445800 | -1.33396300 | 2.08486500  |
| H | -2.41947800 | 2.16502100  | 1.64169700  |
| H | -2.41948400 | -2.16510500 | 1.64162400  |
| H | -2.88235400 | -0.00006400 | 2.79563700  |
| H | -3.28397600 | 2.15585600  | -0.73410000 |
| H | -2.42800600 | 1.26026200  | -1.98539900 |
| H | -3.28392000 | -2.15593000 | -0.73417400 |
| H | -2.42792900 | -1.26028400 | -1.98541500 |
| H | -4.40754000 | -0.00003400 | -1.21038100 |
| H | 3.23727100  | -2.14288900 | -1.17053800 |
| H | 4.50185600  | -0.00005000 | -1.48001700 |
| H | 2.96190600  | -0.00012900 | -2.37528300 |
| H | 3.23721900  | 2.14279100  | -1.17079200 |
| H | 4.67381000  | -1.26048600 | 0.70540300  |
| H | 3.29110000  | -2.15635100 | 1.32900600  |
| H | 1.23208300  | -0.87309100 | 2.17369400  |
| H | 1.23202900  | 0.87322300  | 2.17365700  |
| H | 4.67379600  | 1.26057100  | 0.70521600  |
| H | 3.29111500  | 2.15653200  | 1.32875400  |
| H | 3.52661800  | 0.00016300  | 2.55424500  |
| H | 1.40435200  | -3.27904300 | -0.50043100 |
| H | 0.97513200  | -2.55653100 | 1.05125200  |
| H | 1.40429200  | 3.27902000  | -0.50077000 |
| H | 0.97529400  | 2.55669700  | 1.05102500  |
| H | -4.49373800 | 0.88367900  | 1.11674800  |
| H | -4.49370600 | -0.88371100 | 1.11676900  |

| <b>cat2_bts</b>           | <b>Energy (E)</b> | <b>Energy(E)+ZPE</b>            | <b>Enthalpy (H)</b> | <b>Gibbs free energy (G)</b> |
|---------------------------|-------------------|---------------------------------|---------------------|------------------------------|
| <b>IEFPCM (THF)</b>       | -1351.713264      | -1351.219732                    | -1351.199499        | -1351.263611                 |
| Imaginary Frequency (one) |                   | $\nu = 1149.9i \text{ cm}^{-1}$ |                     |                              |

|   |             |             |             |
|---|-------------|-------------|-------------|
| C | -0.58401500 | -2.51431100 | -0.41643000 |
| C | -0.57898100 | 2.51422000  | -0.43810800 |
| F | -0.69300500 | -2.74026200 | -1.77104300 |
| F | -1.00970500 | -3.67376700 | 0.18899400  |
| F | -1.11132700 | 3.68058000  | 0.07294900  |
| F | -0.57371900 | 2.67303400  | -1.80167400 |
| C | -1.77181500 | 1.28328900  | 1.43105800  |
| C | -1.79567000 | -1.28432900 | 1.46820200  |
| C | -2.57324100 | 0.01196200  | 1.77809200  |
| C | -1.42515100 | -1.31762800 | -0.02844300 |
| C | -1.42450500 | 1.31682400  | -0.07792900 |
| B | -0.55955500 | -0.00083100 | -0.30641800 |
| C | -2.73316200 | 1.26624700  | -0.88381800 |
| C | -2.72611900 | -1.26164600 | -0.85647400 |
| C | -3.53059200 | 0.00341900  | -0.52155100 |
| C | 0.99795800  | 0.03743700  | 0.19303600  |
| C | 2.96944300  | -1.17788300 | -0.69178700 |
| C | 3.45515700  | 0.12185500  | -1.33195800 |
| N | 1.53186700  | 1.24731100  | -0.45624100 |
| C | 2.99451800  | 1.29919500  | -0.46774900 |
| C | 3.55360200  | -1.30392700 | 0.72460000  |
| C | 1.54245900  | -0.07527900 | 1.62778100  |
| C | 3.58882100  | 1.18966600  | 0.94292100  |
| C | 3.08416300  | -0.11339800 | 1.57765500  |
| N | 1.48785000  | -1.13189200 | -0.61861000 |
| C | 0.91022500  | -2.40310800 | -0.13052700 |
| C | 0.87385300  | 2.45643300  | 0.01731200  |
| C | -3.87470700 | 0.01540800  | 0.97042900  |
| H | -0.86658300 | 1.32294600  | 2.04380200  |
| H | -0.90509800 | -1.33929300 | 2.10050600  |
| H | -2.36832100 | 2.16505900  | 1.68731700  |
| H | -2.41985100 | -2.14823500 | 1.71992500  |
| H | -2.80562000 | 0.02990000  | 2.84682700  |
| H | -3.33466900 | 2.15879900  | -0.67420500 |
| H | -2.50673700 | 1.26791300  | -1.95200400 |
| H | -3.33218100 | -2.15315900 | -0.65432800 |
| H | -2.48557300 | -1.26656200 | -1.92118800 |
| H | -4.45342400 | -0.00742200 | -1.10865900 |
| H | 3.24175600  | -2.03729000 | -1.30828900 |
| H | 4.54552600  | 0.09995000  | -1.40334200 |
| H | 3.03534300  | 0.22556600  | -2.33362100 |
| H | 3.29063600  | 2.23845700  | -0.94075100 |
| H | 4.64528300  | -1.30768700 | 0.65450400  |

|   |             |             |             |
|---|-------------|-------------|-------------|
| H | 3.26051900  | -2.25092200 | 1.18462400  |
| H | 1.15950900  | -0.95047100 | 2.15294100  |
| H | 1.22093000  | 0.78960500  | 2.21115400  |
| H | 4.68231200  | 1.19544100  | 0.89409500  |
| H | 3.28320300  | 2.04810300  | 1.54827400  |
| H | 3.47819000  | -0.21402600 | 2.59165500  |
| H | 1.39613300  | -3.22568600 | -0.65645600 |
| H | 1.06376100  | -2.54121700 | 0.93917900  |
| H | 1.37116700  | 3.32016900  | -0.42753100 |
| H | 0.89235700  | 2.58996400  | 1.10804200  |
| H | -4.46404000 | 0.90497400  | 1.21430300  |
| H | -4.47645200 | -0.86276700 | 1.22566000  |
| H | 0.53958100  | -0.61117100 | -1.52909200 |
| H | -0.25154600 | -0.08764400 | -1.67819600 |

| <b>cat2_c</b>       | <b>Energy (E)</b> | <b>Energy(E)+ZPE</b> | <b>Enthalpy (H)</b> | <b>Gibbs free energy (G)</b> |
|---------------------|-------------------|----------------------|---------------------|------------------------------|
| <b>IEFPCM (THF)</b> | -1351.752123      | -1351.251356         | -1351.231015        | -1351.295295                 |

|   |             |             |             |
|---|-------------|-------------|-------------|
| C | -0.57141300 | -2.49848100 | -0.44818200 |
| C | -0.62263900 | 2.49723800  | -0.47386500 |
| F | -0.60444900 | -2.67215900 | -1.81594400 |
| F | -0.98937300 | -3.69834700 | 0.08730800  |
| F | -1.10078900 | 3.67536800  | 0.07730800  |
| F | -0.69621700 | 2.67624400  | -1.83189100 |
| C | -1.76547100 | 1.27697300  | 1.44570000  |
| C | -1.74501100 | -1.30296700 | 1.46474400  |
| C | -2.52672800 | -0.01630200 | 1.80899000  |
| C | -1.42062000 | -1.32640100 | -0.03928700 |
| C | -1.45293800 | 1.30544600  | -0.06196800 |
| B | -0.59464200 | 0.00360100  | -0.45593900 |
| C | -2.78547700 | 1.24349600  | -0.83145500 |
| C | -2.75027000 | -1.30055600 | -0.81977500 |
| C | -3.55256400 | -0.03733200 | -0.45939000 |
| C | 0.96618900  | 0.06266200  | 0.10306000  |
| C | 3.05875900  | -1.19301700 | -0.58527400 |
| C | 3.53695500  | 0.09494900  | -1.25749000 |
| N | 1.54258300  | 1.23832500  | -0.55591700 |
| C | 3.00449600  | 1.30379100  | -0.47657100 |
| C | 3.53863400  | -1.24580100 | 0.86526200  |
| C | 1.46579700  | -0.01161700 | 1.56332700  |
| C | 3.52953500  | 1.25943700  | 0.96524900  |
| C | 3.00411400  | -0.02183900 | 1.62292200  |
| N | 1.55490200  | -1.16770900 | -0.60759100 |
| C | 0.91867200  | -2.42254400 | -0.10155400 |
| C | 0.86317600  | 2.45551700  | -0.11092200 |
| C | -3.85313100 | -0.03479900 | 1.04191400  |
| H | -0.85436200 | 1.34440800  | 2.04627000  |
| H | -0.84110300 | -1.35405200 | 2.07733800  |

|   |             |             |             |
|---|-------------|-------------|-------------|
| H | -2.38529400 | 2.13754300  | 1.72279200  |
| H | -2.35727500 | -2.17034700 | 1.73923900  |
| H | -2.72837300 | -0.01205700 | 2.88469000  |
| H | -3.40547700 | 2.11859100  | -0.59709700 |
| H | -2.58686500 | 1.25553400  | -1.90406100 |
| H | -3.34948500 | -2.19064500 | -0.58682600 |
| H | -2.54482100 | -1.30842800 | -1.89132700 |
| H | -4.49343500 | -0.05605300 | -1.01800700 |
| H | 3.37131600  | -2.07694800 | -1.14553000 |
| H | 4.62927600  | 0.09196000  | -1.27059300 |
| H | 3.17881900  | 0.14515000  | -2.28822600 |
| H | 3.32294300  | 2.22144900  | -0.97624000 |
| H | 4.63188800  | -1.24365700 | 0.85472600  |
| H | 3.22677800  | -2.17468500 | 1.34897100  |
| H | 1.06343200  | -0.86379000 | 2.10878700  |
| H | 1.09693300  | 0.86793900  | 2.08963900  |
| H | 4.62406000  | 1.27984100  | 0.97088300  |
| H | 3.18334100  | 2.13526500  | 1.51985800  |
| H | 3.32978000  | -0.07318500 | 2.66435000  |
| H | 1.41383600  | -3.27051100 | -0.57502700 |
| H | 1.04742300  | -2.48381800 | 0.97238000  |
| H | 1.32413400  | 3.30829000  | -0.61238100 |
| H | 0.93682800  | 2.63026300  | 0.97116800  |
| H | -4.44955200 | 0.84483700  | 1.30474400  |
| H | -4.43242000 | -0.92346700 | 1.31412100  |
| H | 1.22664100  | -1.03381600 | -1.57289700 |
| H | -0.41108400 | -0.01498300 | -1.67114000 |

| <b>cat2_im2d</b>    | <b>Energy (E)</b> | <b>Energy(E)+ZPE</b> | <b>Enthalpy (H)</b> | <b>Gibbs free energy (G)</b> |
|---------------------|-------------------|----------------------|---------------------|------------------------------|
| <b>IEFPCM (THF)</b> | -1834.771024      | -1834.030329         | -1833.996406        | -1834.09223                  |

|   |             |             |             |
|---|-------------|-------------|-------------|
| C | -0.18495400 | 2.19585000  | -0.15587800 |
| C | 3.04121500  | -1.59735700 | -0.37024400 |
| F | -0.96510100 | 1.81207600  | -1.23001900 |
| F | -0.45027200 | 3.53914100  | 0.02295600  |
| F | 4.35300400  | -2.04281900 | -0.33517100 |
| F | 2.46667100  | -2.25383800 | -1.43367100 |
| C | 3.91282100  | 0.69101800  | 0.32942500  |
| C | 2.25295200  | 2.66670500  | 0.44754600  |
| C | 3.69531500  | 2.20827100  | 0.13495500  |
| C | 1.26305900  | 1.90192800  | -0.44692400 |
| C | 2.95561500  | -0.10500400 | -0.57779500 |
| B | 1.43256400  | 0.30388800  | -0.25314300 |
| C | 3.25173800  | 0.28421000  | -2.03747500 |
| C | 1.60676500  | 2.22061400  | -1.91701300 |
| C | 3.05296400  | 1.79858300  | -2.23310200 |
| C | 0.89039900  | -0.29059600 | 1.19114600  |
| C | -1.40991100 | -0.65381600 | 2.17979900  |

|   |             |             |             |
|---|-------------|-------------|-------------|
| C | -1.20016100 | -2.15466800 | 1.97317800  |
| C | 0.29059600  | -2.48252800 | 2.12468500  |
| C | -0.91833400 | -0.23049300 | 3.56226900  |
| C | 1.35433500  | 0.14509400  | 2.60008300  |
| C | 0.76042300  | -2.09387700 | 3.53407400  |
| C | 0.56669000  | -0.58198500 | 3.70244900  |
| N | -0.60530300 | 0.04142800  | 1.11020100  |
| C | -0.81424900 | 1.52224800  | 1.07068000  |
| C | 2.39190000  | -2.15033500 | 0.89800100  |
| C | 4.01549000  | 2.56267200  | -1.32038500 |
| H | 3.77873800  | 0.43391900  | 1.38298100  |
| H | 2.04603600  | 2.51835700  | 1.50979700  |
| H | 4.95449800  | 0.45266600  | 0.08382800  |
| H | 2.18127800  | 3.74616700  | 0.26500400  |
| H | 4.37963400  | 2.74587300  | 0.79891500  |
| H | 4.28158100  | 0.01550300  | -2.30714900 |
| H | 2.58209400  | -0.26278400 | -2.70359000 |
| H | 1.49132000  | 3.29479200  | -2.11512300 |
| H | 0.92331700  | 1.68470400  | -2.57705700 |
| H | 3.26578200  | 2.04822900  | -3.27729200 |
| H | -2.44844200 | -0.36826100 | 2.01922900  |
| H | -1.78649300 | -2.69128700 | 2.72339100  |
| H | -1.55516100 | -2.44041300 | 0.98062600  |
| H | 0.44547300  | -3.54930900 | 1.94576200  |
| H | -1.51553100 | -0.76925800 | 4.30326700  |
| H | -1.08683400 | 0.83575900  | 3.73334900  |
| H | 1.28768000  | 1.22180200  | 2.74937000  |
| H | 2.41129800  | -0.09859200 | 2.69772600  |
| H | 0.18698000  | -2.64516400 | 4.28634200  |
| H | 1.81284000  | -2.35571700 | 3.67137700  |
| H | 0.92690800  | -0.26189100 | 4.68302200  |
| H | -1.88803600 | 1.71285500  | 1.04517800  |
| H | -0.39126900 | 1.96194100  | 1.96689900  |
| H | 2.42870200  | -3.23811400 | 0.81160900  |
| H | 3.03844200  | -1.86513200 | 1.73908800  |
| H | 5.05088800  | 2.29278100  | -1.55258900 |
| H | 3.90968600  | 3.64160700  | -1.47661400 |
| C | -3.09966000 | -0.32181900 | -1.73851400 |
| N | -2.55156800 | -1.40757600 | -1.37642400 |
| H | 0.68006400  | -0.24888500 | -1.04154200 |
| H | -0.90256400 | -0.34101600 | 0.19944300  |
| C | -2.06758000 | -2.37488200 | -2.37941700 |
| N | 0.99645300  | -1.74930400 | 1.06678200  |
| C | -2.81023200 | -3.67599800 | -2.04985900 |
| H | -3.88806100 | -3.54278400 | -2.16567400 |
| H | -2.48139800 | -4.47477600 | -2.71740300 |
| H | -2.60594000 | -3.97237500 | -1.01973900 |
| C | -0.56448800 | -2.57371000 | -2.17848900 |

|   |             |             |             |
|---|-------------|-------------|-------------|
| H | -0.22672400 | -3.43064000 | -2.76574700 |
| H | -0.00926900 | -1.69324800 | -2.49849100 |
| H | -0.31414200 | -2.74422400 | -1.13062000 |
| C | -2.33712800 | -1.99109100 | -3.83578900 |
| H | -3.40471900 | -1.86288900 | -4.03201000 |
| H | -1.81098200 | -1.07524400 | -4.11369500 |
| H | -1.96995200 | -2.78965600 | -4.48194200 |
| C | -3.75202900 | 0.57291600  | -0.75559300 |
| C | -3.84507500 | 1.94469300  | -1.00053000 |
| C | -4.31576100 | 0.04250900  | 0.40765200  |
| C | -4.44802600 | 2.78293800  | -0.06912200 |
| H | -3.40589700 | 2.35619500  | -1.90040600 |
| C | -4.92948100 | 0.87962200  | 1.33405400  |
| H | -4.26948800 | -1.02925600 | 0.56050100  |
| C | -4.98790800 | 2.25234000  | 1.10078900  |
| H | -4.49564100 | 3.84827500  | -0.25484400 |
| H | -5.37271100 | 0.46244300  | 2.23005200  |
| H | -5.46493800 | 2.90497000  | 1.82129300  |
| H | -3.15146700 | 0.00544000  | -2.77951100 |

| <b>cat2_im2ets</b>        | <b>Energy (E)</b> | <b>Energy(E)+ZPE</b>           | <b>Enthalpy (H)</b> | <b>Gibbs free energy (G)</b> |
|---------------------------|-------------------|--------------------------------|---------------------|------------------------------|
| <b>IEFPCM (THF)</b>       | -1834.747569      | -1834.01145                    | -1833.978475        | -1834.069648                 |
| Imaginary Frequency (one) |                   | $\nu = 746.4i \text{ cm}^{-1}$ |                     |                              |

|   |             |             |             |
|---|-------------|-------------|-------------|
| C | -0.12306600 | -2.09108200 | -0.64446200 |
| C | 3.11195600  | 1.46026800  | 0.68807300  |
| F | -0.74409500 | -2.25193500 | 0.59383300  |
| F | -0.41384500 | -3.25954500 | -1.32641400 |
| F | 4.39682600  | 1.97681300  | 0.62225400  |
| F | 2.75906700  | 1.55961900  | 2.01829700  |
| C | 3.84357100  | -0.25097600 | -1.04843800 |
| C | 2.17208400  | -2.09562000 | -1.73615500 |
| C | 3.64996100  | -1.71733400 | -1.49229600 |
| C | 1.35135100  | -1.85999200 | -0.45432500 |
| C | 3.05687200  | 0.01762100  | 0.24660300  |
| B | 1.49200600  | -0.31762300 | 0.03339400  |
| C | 3.59064800  | -0.93578500 | 1.33267200  |
| C | 1.94417400  | -2.75970500 | 0.64683500  |
| C | 3.42255400  | -2.40087400 | 0.88782500  |
| C | 0.67073400  | 0.77976600  | -0.87270600 |
| C | -1.70265700 | 1.34063400  | -1.30486600 |
| C | -1.49257300 | 2.64138900  | -0.51980900 |
| C | -0.04353600 | 3.11670900  | -0.69225300 |
| C | -1.43857700 | 1.60690300  | -2.79060700 |
| C | 0.94895800  | 1.03778000  | -2.38229700 |
| C | 0.20290700  | 3.40685200  | -2.18042200 |
| C | 0.00151600  | 2.10068600  | -2.95759400 |

|   |             |             |             |
|---|-------------|-------------|-------------|
| N | -0.77200600 | 0.33025300  | -0.72235700 |
| C | -0.89432900 | -0.99322400 | -1.37314700 |
| C | 2.23427200  | 2.45237900  | -0.07763300 |
| C | 4.21388700  | -2.63340600 | -0.40190900 |
| H | 3.53711900  | 0.41945000  | -1.85381100 |
| H | 1.78487500  | -1.52237100 | -2.58053600 |
| H | 4.91439400  | -0.07490000 | -0.88851000 |
| H | 2.12629900  | -3.15209400 | -2.02982500 |
| H | 4.20444500  | -1.87649000 | -2.42275500 |
| H | 4.65296800  | -0.74101700 | 1.53244100  |
| H | 3.04426600  | -0.76921100 | 2.26292400  |
| H | 1.87286400  | -3.81849200 | 0.36163900  |
| H | 1.38455100  | -2.63472500 | 1.57533900  |
| H | 3.81304400  | -3.05286600 | 1.67610300  |
| H | -2.72098100 | 0.96911300  | -1.16785900 |
| H | -2.18009700 | 3.40215300  | -0.89972700 |
| H | -1.70316500 | 2.48857800  | 0.53913000  |
| H | 0.11933600  | 4.01737800  | -0.09230300 |
| H | -2.15203000 | 2.36064000  | -3.13914100 |
| H | -1.61007300 | 0.70603900  | -3.38561500 |
| H | 0.88707500  | 0.13513300  | -2.98637600 |
| H | 1.97459100  | 1.38545700  | -2.49442300 |
| H | -0.48944800 | 4.18059100  | -2.52923400 |
| H | 1.21690100  | 3.78476000  | -2.33610000 |
| H | 0.21901600  | 2.25781600  | -4.01761200 |
| H | -1.94368400 | -1.27794300 | -1.40460600 |
| H | -0.53551300 | -0.97997800 | -2.40058600 |
| H | 2.29699100  | 3.39748700  | 0.46744700  |
| H | 2.71379000  | 2.60797900  | -1.05261600 |
| H | 5.27444300  | -2.41428800 | -0.23923600 |
| H | 4.13362300  | -3.68122100 | -0.71141000 |
| C | -3.17976800 | 0.04090300  | 1.71001200  |
| N | -1.91303600 | 0.19443600  | 1.74217600  |
| H | 0.93743200  | -0.20870500 | 1.11069900  |
| H | -1.26461600 | 0.17430100  | 0.69909700  |
| C | -1.24305600 | 0.49553300  | 3.05727400  |
| N | 0.82843000  | 2.06139100  | -0.16206500 |
| C | -2.24061900 | 0.81205300  | 4.17358000  |
| H | -2.86282000 | -0.04237000 | 4.44995500  |
| H | -1.65378800 | 1.08125200  | 5.05163800  |
| H | -2.87512000 | 1.66821000  | 3.93080200  |
| C | -0.31803500 | 1.69616300  | 2.87694600  |
| H | 0.30652800  | 1.78951900  | 3.76683500  |
| H | 0.32779200  | 1.58870700  | 2.00874400  |
| H | -0.90592100 | 2.61313300  | 2.77500200  |
| C | -0.46643000 | -0.76929400 | 3.44030600  |
| H | -1.14736900 | -1.61813600 | 3.53423200  |
| H | 0.29033300  | -0.99600600 | 2.69549100  |

|   |             |             |             |
|---|-------------|-------------|-------------|
| H | 0.01889500  | -0.59783800 | 4.40267800  |
| C | -3.99747800 | -0.42802500 | 0.57482000  |
| C | -3.78396400 | -1.68936400 | 0.01752300  |
| C | -5.08455700 | 0.34992500  | 0.16224000  |
| C | -4.63408400 | -2.14786700 | -0.98571300 |
| H | -2.95550400 | -2.29402100 | 0.36215900  |
| C | -5.91140500 | -0.10341000 | -0.85654700 |
| H | -5.26524500 | 1.31366000  | 0.62449400  |
| C | -5.68553800 | -1.35370400 | -1.43053500 |
| H | -4.46731000 | -3.12534000 | -1.41969900 |
| H | -6.73667400 | 0.50970700  | -1.19462300 |
| H | -6.33857100 | -1.71175500 | -2.21612700 |
| H | -3.74359700 | 0.24428500  | 2.61493600  |

| <b>cat2_im2f</b>    | <b>Energy (E)</b> | <b>Energy(E)+ZPE</b> | <b>Enthalpy (H)</b> | <b>Gibbs free energy (G)</b> |
|---------------------|-------------------|----------------------|---------------------|------------------------------|
| <b>IEFPCM (THF)</b> | -1834.755011      | -1834.015324         | -1833.98176         | -1834.074702                 |

|   |             |             |             |
|---|-------------|-------------|-------------|
| C | 0.06586000  | -0.21269300 | 2.30525300  |
| C | 2.87455000  | 0.32112500  | -1.77248500 |
| F | -0.62419700 | 1.00093000  | 2.17253900  |
| F | -0.07942000 | -0.53612100 | 3.64193100  |
| F | 4.10701300  | 0.15734100  | -2.38726500 |
| F | 2.45803200  | 1.58134500  | -2.16167300 |
| C | 3.86737300  | -0.89529700 | 0.22981800  |
| C | 2.41762900  | -1.16797200 | 2.34709600  |
| C | 3.83642500  | -0.96392000 | 1.77202700  |
| C | 1.49738700  | -0.02100100 | 1.89025400  |
| C | 2.97502800  | 0.25665300  | -0.26760900 |
| B | 1.46368600  | 0.06047300  | 0.27008000  |
| C | 3.52017000  | 1.56746100  | 0.33019400  |
| C | 2.09197300  | 1.29388200  | 2.42775700  |
| C | 3.51269600  | 1.49988600  | 1.86916000  |
| C | 0.61077100  | -1.13202800 | -0.47283700 |
| C | -1.75058900 | -1.79969000 | -0.64138700 |
| C | -1.74172700 | -1.31864200 | -2.09855500 |
| C | -0.34290700 | -1.52365700 | -2.69515900 |
| C | -1.41060000 | -3.29657000 | -0.60960800 |
| C | 0.98906900  | -2.64225900 | -0.42204700 |
| C | -0.01436100 | -3.02476600 | -2.67485700 |
| C | -0.01696000 | -3.49347600 | -1.21466600 |
| N | -0.77136700 | -0.96889800 | 0.08805600  |
| C | -0.72901900 | -1.25540900 | 1.52533200  |
| C | 1.94227000  | -0.68454800 | -2.45214300 |
| C | 4.40541900  | 0.34425600  | 2.32962500  |
| H | 3.55523500  | -1.85525900 | -0.18532400 |
| H | 2.03721400  | -2.14277200 | 2.03708100  |
| H | 4.90525700  | -0.74028000 | -0.09023600 |



|   |             |             |             |
|---|-------------|-------------|-------------|
| H | 2.48457500  | -1.19129700 | 3.44259600  |
| H | 4.46425400  | -1.80029500 | 2.09600600  |
| H | 4.54585500  | 1.75638500  | -0.01532200 |
| H | 2.90432500  | 2.40526200  | -0.00310100 |
| H | 2.13624600  | 1.28009700  | 3.52569200  |
| H | 1.46079800  | 2.13660300  | 2.13925400  |
| H | 3.90819200  | 2.44236000  | 2.26242800  |
| H | -2.73612200 | -1.63100000 | -0.19520200 |
| H | -2.47924300 | -1.88346700 | -2.67643600 |
| H | -1.99934500 | -0.25836900 | -2.14571800 |
| H | -0.32044300 | -1.14134800 | -3.72112200 |
| H | -2.16410700 | -3.85192300 | -1.17863300 |
| H | -1.43825600 | -3.67410900 | 0.41668700  |
| H | 1.04787900  | -3.02008300 | 0.59765000  |
| H | 1.98242700  | -2.79502600 | -0.84262300 |
| H | -0.75747200 | -3.57581100 | -3.26186200 |
| H | 0.96159300  | -3.21151500 | -3.13092400 |
| H | 0.26676800  | -4.54861800 | -1.16111200 |
| H | -1.74531500 | -1.26400700 | 1.92103100  |
| H | -0.29241100 | -2.22808700 | 1.77186700  |
| H | 1.87772600  | -0.37741300 | -3.49951900 |
| H | 2.46097700  | -1.65129500 | -2.43142300 |
| H | 5.42928600  | 0.49224800  | 1.97014600  |
| H | 4.43818100  | 0.30509700  | 3.42401400  |
| C | -3.22167400 | 1.79493800  | -0.45842800 |
| N | -1.94750300 | 1.91261900  | -0.48512900 |
| H | 0.81866100  | 1.05356700  | -0.04202000 |
| H | -1.34961600 | 1.14491300  | -0.09052200 |
| C | -1.22732400 | 3.04763300  | -1.14950600 |
| N | 0.59110700  | -0.72102000 | -1.89597700 |
| C | -2.20249800 | 4.11470600  | -1.63557500 |
| H | -2.80020300 | 4.53416200  | -0.82243200 |
| H | -1.60367100 | 4.92182000  | -2.05696300 |
| H | -2.85841100 | 3.75420900  | -2.43119200 |
| C | -0.45260400 | 2.45895200  | -2.32693200 |
| H | 0.22375600  | 3.21850100  | -2.72069800 |
| H | 0.13333600  | 1.59133200  | -2.02577600 |
| H | -1.14925700 | 2.16345200  | -3.11657400 |
| C | -0.30308600 | 3.64611200  | -0.08629400 |
| H | -0.88374800 | 4.03276200  | 0.75390100  |
| H | 0.40114500  | 2.89801400  | 0.27070400  |
| H | 0.25445800  | 4.46786800  | -0.53762900 |
| C | -3.98161700 | 0.78234000  | 0.26445100  |
| C | -3.61178700 | 0.37860400  | 1.54941000  |
| C | -5.14710400 | 0.28466500  | -0.33169500 |
| C | -4.39832300 | -0.55063100 | 2.22077300  |
| H | -2.72512900 | 0.79132600  | 2.01185300  |
| C | -5.90584400 | -0.66717600 | 0.33266400  |

|   |             |             |             |
|---|-------------|-------------|-------------|
| H | -5.43917000 | 0.62573200  | -1.31816000 |
| C | -5.53091600 | -1.08197700 | 1.61046000  |
| H | -4.12006600 | -0.86135200 | 3.21954700  |
| H | -6.79226500 | -1.07551300 | -0.13421600 |
| H | -6.13268100 | -1.81242100 | 2.13610400  |
| H | -3.79422500 | 2.52582300  | -1.01759200 |

| <b>cat2_im2g</b>          | <b>Energy (E)</b> | <b>Energy(E)+ZPE</b>           | <b>Enthalpy (H)</b> | <b>Gibbs free energy (G)</b> |
|---------------------------|-------------------|--------------------------------|---------------------|------------------------------|
| <b>IEFPCM (THF)</b>       | -1834.738671      | -1834.001095                   | -1833.968231        | -1834.058693                 |
| Imaginary Frequency (one) |                   | $\nu = 109.8i \text{ cm}^{-1}$ |                     |                              |

|   |             |             |             |
|---|-------------|-------------|-------------|
| C | 1.20950400  | 2.42997400  | 0.28877500  |
| C | 0.76978000  | -2.33200600 | -1.27054900 |
| F | 0.00281000  | 3.02432500  | 0.00560600  |
| F | 2.09454900  | 3.49467000  | 0.38413500  |
| F | 1.29569600  | -3.38367100 | -1.99610000 |
| F | -0.58028800 | -2.32729000 | -1.59502500 |
| C | 2.90470200  | -1.08098100 | -1.75752900 |
| C | 3.12263000  | 1.33812000  | -0.95631000 |
| C | 3.48412700  | 0.31474700  | -2.04752500 |
| C | 1.58988400  | 1.48145900  | -0.82928700 |
| C | 1.36818600  | -1.00634400 | -1.65335500 |
| B | 0.94272600  | 0.04019200  | -0.49947600 |
| C | 0.82484800  | -0.47669400 | -2.99349900 |
| C | 1.05196500  | 1.94128000  | -2.19844900 |
| C | 1.41534600  | 0.91579700  | -3.28948400 |
| C | 1.12766500  | -0.47853900 | 1.03947900  |
| C | 0.30141400  | 0.16151300  | 3.25180000  |
| C | -0.54552600 | -1.11748500 | 3.28088400  |
| C | 0.17063600  | -2.21667600 | 2.48618200  |
| C | 1.64721500  | -0.13348700 | 3.93413800  |
| C | 2.52034800  | -0.76213300 | 1.67911800  |
| C | 1.51933000  | -2.51479400 | 3.15752500  |
| C | 2.35993500  | -1.23227500 | 3.13550100  |
| N | 0.44601900  | 0.56705000  | 1.84389900  |
| C | 1.13208200  | 1.85484300  | 1.70921400  |
| C | 0.86670600  | -2.73475200 | 0.19839800  |
| C | 2.93898500  | 0.80654900  | -3.39115200 |
| H | 3.34885700  | -1.47933900 | -0.84304700 |
| H | 3.57761900  | 1.04078100  | -0.01001600 |
| H | 3.18913800  | -1.76247700 | -2.56828400 |
| H | 3.56015800  | 2.30726100  | -1.22126700 |
| H | 4.57446100  | 0.23572900  | -2.10425100 |
| H | 1.07925900  | -1.15954300 | -3.81520400 |
| H | -0.26494700 | -0.40874400 | -2.94499900 |
| H | 1.46977500  | 2.91964600  | -2.47111100 |
| H | -0.03258000 | 2.05337800  | -2.14677700 |

|   |             |             |             |
|---|-------------|-------------|-------------|
| H | 1.01274700  | 1.26785100  | -4.24511300 |
| H | -0.22141800 | 0.96691000  | 3.78032400  |
| H | -0.68602100 | -1.44254100 | 4.31546700  |
| H | -1.53215800 | -0.92730800 | 2.85009000  |
| H | -0.45069500 | -3.11866800 | 2.45564800  |
| H | 1.47323000  | -0.45576300 | 4.96626700  |
| H | 2.26632700  | 0.76619200  | 3.97838000  |
| H | 3.14579900  | 0.12910400  | 1.66362000  |
| H | 3.07084400  | -1.51724800 | 1.11852300  |
| H | 1.35388900  | -2.85168800 | 4.18638100  |
| H | 2.04035000  | -3.32121000 | 2.63393800  |
| H | 3.34441400  | -1.42710900 | 3.57039200  |
| H | 0.59205500  | 2.59732100  | 2.30387300  |
| H | 2.16448600  | 1.83824300  | 2.07774600  |
| H | 0.29260700  | -3.65970900 | 0.30804800  |
| H | 1.91612600  | -2.98976100 | 0.38686900  |
| H | 3.21678600  | 0.10880800  | -4.18850900 |
| H | 3.37056200  | 1.78261600  | -3.63679900 |
| N | 0.32039500  | -1.72750400 | 1.10706700  |
| H | -3.53749700 | 0.02805100  | -1.48921600 |
| N | -3.01186300 | -0.57449400 | -0.86828800 |
| C | -3.57238200 | -1.94780500 | -0.79357300 |
| C | -2.18306000 | 0.04256700  | -0.06097900 |
| H | -0.35567300 | 0.15709400  | -0.59865800 |
| C | -3.46339600 | -2.61263800 | -2.16629500 |
| H | -2.42886000 | -2.78409600 | -2.44344800 |
| H | -3.99198900 | -3.56701100 | -2.14023400 |
| H | -3.94003100 | -1.98914500 | -2.92762000 |
| C | -5.05525900 | -1.75697900 | -0.44344700 |
| H | -5.16329700 | -1.23928500 | 0.51090100  |
| H | -5.57367200 | -1.18291500 | -1.21603100 |
| H | -5.53745400 | -2.73284600 | -0.37071700 |
| C | -2.88901100 | -2.75164600 | 0.30347100  |
| H | -3.28087400 | -3.76919500 | 0.27576000  |
| H | -1.81378600 | -2.77257700 | 0.15822700  |
| H | -3.10935400 | -2.33129100 | 1.28791200  |
| C | -2.34239400 | 1.49980900  | 0.06941700  |
| C | -2.33602900 | 2.03866600  | 1.35563600  |
| C | -2.63581800 | 2.31175300  | -1.02830700 |
| C | -2.64605000 | 3.38061900  | 1.54223600  |
| H | -2.08020400 | 1.40549200  | 2.19441700  |
| C | -2.92094900 | 3.65597100  | -0.83811400 |
| H | -2.58133500 | 1.90905100  | -2.03459700 |
| C | -2.93515600 | 4.18954100  | 0.44880800  |
| H | -2.64819500 | 3.79733500  | 2.54140400  |
| H | -3.11947300 | 4.29091500  | -1.69187100 |
| H | -3.15826900 | 5.23860700  | 0.59546000  |
| H | -1.66366800 | -0.52737400 | 0.70284300  |

| <b>cat2_am2</b>     | <b>Energy (E)</b> | <b>Energy(E)+ZPE</b> | <b>Enthalpy (H)</b> | <b>Gibbs free energy (G)</b> |
|---------------------|-------------------|----------------------|---------------------|------------------------------|
| <b>IEFPCM (THF)</b> | -1834.796701      | -1834.055345         | -1834.021111        | -1834.116739                 |

|   |             |             |             |
|---|-------------|-------------|-------------|
| C | 0.21666800  | -0.31235400 | 2.37973600  |
| C | 2.76772700  | 0.34741000  | -1.90484500 |
| F | -0.45704700 | 0.88412500  | 2.37129900  |
| F | 0.26053900  | -0.71015400 | 3.69741300  |
| F | 3.97907500  | 0.25147800  | -2.55216700 |
| F | 2.27364700  | 1.59004700  | -2.21611400 |
| C | 3.90413400  | -0.90885600 | 0.02451900  |
| C | 2.60091600  | -1.24400200 | 2.21032700  |
| C | 3.98140700  | -0.99209600 | 1.56483900  |
| C | 1.61176200  | -0.08728400 | 1.83689000  |
| C | 2.94716400  | 0.25606800  | -0.40481900 |
| B | 1.65249000  | -0.27555000 | 0.28759900  |
| C | 3.50351400  | 1.56271100  | 0.19152200  |
| C | 2.22372300  | 1.23528300  | 2.33665100  |
| C | 3.60949300  | 1.46546000  | 1.71928800  |
| C | 0.62855200  | -1.23661900 | -0.47024000 |
| C | -1.77149800 | -1.69429200 | -0.50548100 |
| C | -1.84064400 | -1.10888300 | -1.91640300 |
| C | -0.50947700 | -1.36148400 | -2.62526900 |
| C | -1.53263000 | -3.20894800 | -0.59056300 |
| C | 0.92473500  | -2.76367600 | -0.53058500 |
| C | -0.26222100 | -2.87439100 | -2.73046700 |
| C | -0.20203000 | -3.46090800 | -1.31239100 |
| N | -0.67301000 | -1.00346100 | 0.19859500  |
| C | -0.62426800 | -1.32188800 | 1.62034600  |
| C | 1.83424400  | -0.68094400 | -2.51784600 |
| C | 4.55074300  | 0.32233400  | 2.10560400  |
| H | 3.58250800  | -1.86878200 | -0.38710300 |
| H | 2.21447100  | -2.21959700 | 1.90361000  |
| H | 4.89562400  | -0.70042000 | -0.38839100 |
| H | 2.69734300  | -1.26735600 | 3.29978500  |
| H | 4.64360300  | -1.81985700 | 1.83244800  |
| H | 4.49114500  | 1.75685700  | -0.24241900 |
| H | 2.86026100  | 2.39851600  | -0.08143700 |
| H | 2.30109600  | 1.20007900  | 3.42943000  |
| H | 1.56513300  | 2.06567100  | 2.08485900  |
| H | 4.00707400  | 2.40971100  | 2.10068200  |
| H | -2.69557900 | -1.47788100 | 0.03336700  |
| H | -2.65549000 | -1.58112000 | -2.47188100 |
| H | -2.02856900 | -0.03679500 | -1.86235300 |
| H | -0.52234000 | -0.90027400 | -3.61661700 |
| H | -2.35871800 | -3.67738300 | -1.13409100 |
| H | -1.51261200 | -3.65214300 | 0.40960000  |

|   |             |             |             |
|---|-------------|-------------|-------------|
| H | 0.99374000  | -3.19285800 | 0.47070100  |
| H | 1.88363700  | -2.96129100 | -1.01376900 |
| H | -1.07081200 | -3.34072400 | -3.30159200 |
| H | 0.67033400  | -3.07678300 | -3.26571200 |
| H | 0.00098000  | -4.53398500 | -1.36223600 |
| H | -1.63717600 | -1.25971200 | 2.02124800  |
| H | -0.23417500 | -2.32135300 | 1.85236500  |
| H | 1.68140500  | -0.37999000 | -3.55611400 |
| H | 2.35714300  | -1.64609600 | -2.52845600 |
| H | 5.54756600  | 0.49620600  | 1.68878400  |
| H | 4.65022400  | 0.26563400  | 3.19400100  |
| C | -3.43622600 | 1.95730400  | -0.58957700 |
| N | -2.06671600 | 2.14215200  | -0.14554800 |
| H | -1.59147600 | 1.24263400  | -0.09957900 |
| C | -1.24014400 | 3.10060400  | -0.88785700 |
| N | 0.54378200  | -0.68974000 | -1.84360600 |
| C | -0.98816100 | 2.69331400  | -2.34845700 |
| H | -1.92320800 | 2.60746000  | -2.90769300 |
| H | -0.37031400 | 3.44322800  | -2.84905000 |
| H | -0.45474200 | 1.74031000  | -2.38154000 |
| C | 0.09885600  | 3.13775700  | -0.15346600 |
| H | 0.80838200  | 3.79081700  | -0.66604500 |
| H | -0.04683000 | 3.47845900  | 0.87277400  |
| H | 0.52290100  | 2.12924000  | -0.13180000 |
| C | -1.89196300 | 4.48335000  | -0.83296200 |
| H | -2.78182200 | 4.53524200  | -1.46424300 |
| H | -2.17574500 | 4.71977500  | 0.19446900  |
| H | -1.18978700 | 5.23982100  | -1.18902700 |
| C | -4.09408100 | 0.84501400  | 0.19781300  |
| C | -3.75586700 | 0.62279500  | 1.53494900  |
| C | -5.04007600 | 0.01566800  | -0.40587400 |
| C | -4.35677500 | -0.41084100 | 2.24918700  |
| H | -2.99693600 | 1.24527900  | 1.99081200  |
| C | -5.64016200 | -1.01898900 | 0.30686900  |
| H | -5.29746600 | 0.17505700  | -1.44764100 |
| C | -5.29776900 | -1.23679100 | 1.63845200  |
| H | -4.08549300 | -0.57317000 | 3.28590700  |
| H | -6.36859900 | -1.65715000 | -0.17847800 |
| H | -5.75970300 | -2.04301100 | 2.19492900  |
| H | -3.98894900 | 2.88673600  | -0.41806800 |
| H | -3.54266800 | 1.72568600  | -1.66171600 |

| <b>cat3</b>         | Energy (E)  | Energy(E)+ZPE | Enthalpy (H) | Gibbs free energy (G) |
|---------------------|-------------|---------------|--------------|-----------------------|
| <b>IEFPCM (THF)</b> | -643.689655 | -643.33005    | -643.31591   | -643.368604           |

|   |             |             |             |
|---|-------------|-------------|-------------|
| C | -0.67076500 | -2.52015300 | -0.22772600 |
| C | -0.67072700 | 2.52017600  | -0.22771300 |
| C | -1.52619000 | -1.36142400 | 0.29264100  |

|   |             |             |             |
|---|-------------|-------------|-------------|
| C | -1.52617000 | 1.36147000  | 0.29264700  |
| B | -0.74800400 | 0.00001300  | 0.26162800  |
| C | -2.91819500 | 1.26770200  | -0.34612200 |
| C | -2.91826300 | -1.26772500 | -0.34598500 |
| C | -3.66340500 | 0.00003500  | 0.08302200  |
| C | 0.82924700  | -0.00000900 | 0.37688200  |
| C | 2.84723400  | -1.24490500 | 0.04325000  |
| C | 3.50629200  | -0.00001900 | -0.53389600 |
| N | 1.41478000  | 1.20413500  | -0.21335600 |
| C | 2.84725200  | 1.24487100  | 0.04326300  |
| N | 1.41476400  | -1.20414500 | -0.21338000 |
| C | 0.76274700  | -2.41133700 | 0.28052500  |
| C | 0.76278000  | 2.41133000  | 0.28055900  |
| H | -3.50836700 | 2.15729900  | -0.10475500 |
| H | -2.80576200 | 1.25666900  | -1.43678900 |
| H | -3.50844600 | -2.15726100 | -0.10442300 |
| H | -2.80594500 | -1.25686300 | -1.43666500 |
| H | -3.78259300 | 0.00009800  | 1.17316500  |
| H | -4.66937900 | 0.00003700  | -0.34372700 |
| H | 3.26193300  | -2.14556100 | -0.41588400 |
| H | 4.57514800  | -0.00002600 | -0.30948400 |
| H | 3.37266600  | -0.00001400 | -1.61702700 |
| H | 3.26196200  | 2.14552400  | -0.41586800 |
| H | 1.34484400  | -3.26615700 | -0.07140900 |
| H | 0.77272700  | -2.44901200 | 1.38736400  |
| H | 1.34490200  | 3.26614400  | -0.07134500 |
| H | 0.77273300  | 2.44898500  | 1.38739900  |
| H | -1.09712400 | 3.48546300  | 0.06287200  |
| H | -0.64209700 | 2.49075000  | -1.32088800 |
| H | -0.64215900 | -2.49073800 | -1.32090100 |
| H | -1.09718600 | -3.48542300 | 0.06288100  |
| H | 3.04978900  | -1.29814700 | 1.13067800  |
| H | 3.04981900  | 1.29810000  | 1.13068900  |
| H | -1.66767300 | -1.51632900 | 1.37930300  |
| H | -1.66780700 | 1.51641500  | 1.37927200  |
| H | 1.05018700  | -0.00002100 | 1.48645900  |

| <b>cat3_bts</b>           | <b>Energy (E)</b> | <b>Energy(E)+ZPE</b>           | <b>Enthalpy (H)</b> | <b>Gibbs free energy (G)</b> |
|---------------------------|-------------------|--------------------------------|---------------------|------------------------------|
| <b>IEFPCM (THF)</b>       | -644.834319       | -644.457906                    | -644.443996         | -644.495765                  |
| Imaginary Frequency (one) |                   | $\nu= 1240.1i \text{ cm}^{-1}$ |                     |                              |

|   |            |             |             |
|---|------------|-------------|-------------|
| C | 0.77052300 | 2.54919900  | -0.00495100 |
| C | 0.57773000 | -2.54179000 | -0.23219600 |
| C | 1.56476100 | 1.31168300  | 0.42744600  |
| C | 1.48631500 | -1.39888000 | 0.21885000  |
| B | 0.72304900 | -0.00938200 | 0.10909900  |
| C | 2.84360500 | -1.31964400 | -0.48176900 |

|   |             |             |             |
|---|-------------|-------------|-------------|
| C | 2.93114700  | 1.22358600  | -0.26537300 |
| C | 3.64409400  | -0.10660300 | 0.01282400  |
| C | -0.82775200 | -0.00357200 | 0.55117900  |
| C | -2.78678400 | 1.29754800  | -0.24524900 |
| C | -3.45240400 | -0.01195200 | -0.64403500 |
| N | -1.47128600 | -1.18434100 | 0.01213800  |
| C | -2.90776500 | -1.15852800 | 0.20171000  |
| N | -1.31962200 | 1.18076500  | -0.20767500 |
| C | -0.71651500 | 2.42669400  | 0.32997700  |
| C | -0.80308900 | -2.41863700 | 0.41729500  |
| H | 3.42372500  | -2.23720600 | -0.33025100 |
| H | 2.68310200  | -1.22220700 | -1.56323200 |
| H | 3.57632100  | 2.06163500  | 0.02229600  |
| H | 2.77305800  | 1.30795400  | -1.34900300 |
| H | 3.81031500  | -0.20656700 | 1.09216200  |
| H | 4.63134400  | -0.09608200 | -0.45716300 |
| H | -3.04798400 | 2.09914900  | -0.93907400 |
| H | -4.53338500 | 0.08968300  | -0.52560000 |
| H | -3.23483300 | -0.22932200 | -1.69129500 |
| H | -3.33305200 | -2.10612900 | -0.13505800 |
| H | -1.27002200 | 3.26504600  | -0.09770600 |
| H | -0.87341100 | 2.44394200  | 1.41608100  |
| H | -1.43782600 | -3.25004800 | 0.10188900  |
| H | -0.70336600 | -2.48537400 | 1.51522300  |
| H | 1.00484200  | -3.52179900 | 0.00971400  |
| H | 0.44271500  | -2.49804000 | -1.31795600 |
| H | 0.86583600  | 2.66681700  | -1.09025800 |
| H | 1.15177800  | 3.47217400  | 0.44386300  |
| H | -3.12949900 | 1.59390700  | 0.75687800  |
| H | -3.19015800 | -1.01965000 | 1.26182900  |
| H | 1.72752200  | 1.35309900  | 1.51455600  |
| H | 1.68025000  | -1.53631100 | 1.29647400  |
| H | -1.04281000 | 0.14301300  | 1.62757900  |
| H | 0.41258300  | 0.18952100  | -1.30689800 |
| H | -0.40913400 | 0.70010700  | -1.14603100 |

| <b>cat3_c</b>       | <b>Energy (E)</b> | <b>Energy(E)+ZPE</b> | <b>Enthalpy (H)</b> | <b>Gibbs free energy (G)</b> |
|---------------------|-------------------|----------------------|---------------------|------------------------------|
| <b>IEFPCM (THF)</b> | -644.877154       | -644.493649          | -644.479545         | -644.531744                  |

|   |             |             |             |
|---|-------------|-------------|-------------|
| C | -0.72854700 | -2.53369100 | -0.17931300 |
| C | -0.68172200 | 2.52320500  | -0.30018400 |
| C | -1.52529800 | -1.33513700 | 0.33393200  |
| C | -1.52009100 | 1.36762300  | 0.24333200  |
| B | -0.76928000 | 0.00508800  | -0.15577300 |
| C | -2.95176500 | 1.29294300  | -0.28753900 |
| C | -2.95927100 | -1.27905200 | -0.19705900 |
| C | -3.65985400 | 0.02513100  | 0.22033200  |
| C | 0.76763000  | 0.04736300  | 0.35519700  |

|   |             |             |             |
|---|-------------|-------------|-------------|
| C | 2.88912800  | -1.25385300 | 0.01738800  |
| C | 3.56927300  | 0.04822000  | -0.37808100 |
| N | 1.46194700  | 1.20918100  | -0.15621000 |
| C | 2.85435400  | 1.23862800  | 0.25470600  |
| N | 1.42427900  | -1.18827400 | -0.24396200 |
| C | 0.73903400  | -2.44023500 | 0.23493400  |
| C | 0.75533600  | 2.44364500  | 0.22264900  |
| H | -3.54218100 | 2.17580100  | -0.01033100 |
| H | -2.91931300 | 1.26275800  | -1.38406700 |
| H | -3.55686500 | -2.13840700 | 0.13441300  |
| H | -2.92436300 | -1.31944300 | -1.29348700 |
| H | -3.70477600 | 0.06394400  | 1.31579800  |
| H | -4.69476900 | 0.01156200  | -0.13446800 |
| H | 3.29683800  | -2.11331100 | -0.51752500 |
| H | 4.61401600  | 0.00187300  | -0.06490200 |
| H | 3.54464100  | 0.16361400  | -1.46413600 |
| H | 3.31232000  | 2.16710700  | -0.09214300 |
| H | 1.32751600  | -3.27831000 | -0.14397200 |
| H | 0.82855700  | -2.41691600 | 1.32340800  |
| H | 1.34576800  | 3.27630700  | -0.16914100 |
| H | 0.74118700  | 2.54634200  | 1.32289600  |
| H | -1.08250900 | 3.50799700  | -0.02686700 |
| H | -0.65611700 | 2.46888100  | -1.39323500 |
| H | -0.78776100 | -2.56491500 | -1.27339300 |
| H | -1.09496600 | -3.50149200 | 0.18618300  |
| H | 2.98872900  | -1.43010800 | 1.09097200  |
| H | 2.96129700  | 1.20245100  | 1.35504500  |
| H | -1.56373900 | -1.39105900 | 1.43412900  |
| H | -1.57114100 | 1.47062800  | 1.34058500  |
| H | 0.92140800  | -0.07760700 | 1.44622200  |
| H | -0.66812900 | -0.05673100 | -1.39884800 |
| H | 1.23792900  | -1.07149300 | -1.24482500 |

| <b>cat3_im2d</b>    | <b>Energy (E)</b> | <b>Energy(E)+ZPE</b> | <b>Enthalpy (H)</b> | <b>Gibbs free energy (G)</b> |
|---------------------|-------------------|----------------------|---------------------|------------------------------|
| <b>IEFPCM (THF)</b> | -1127.897647      | -1127.274435         | -1127.24682         | -1127.330309                 |

|   |             |             |             |
|---|-------------|-------------|-------------|
| C | -0.91038500 | -1.92172400 | -1.71816000 |
| C | -3.60978000 | 0.91046500  | 1.48577200  |
| C | -2.35328800 | -1.70263500 | -1.26633800 |
| C | -3.79833300 | -0.18232200 | 0.43543300  |
| B | -2.34094600 | -0.55853500 | -0.12782000 |
| C | -4.67366800 | 0.20998500  | -0.75511100 |
| C | -3.29476200 | -1.23893000 | -2.37902000 |
| C | -4.68831700 | -0.89936800 | -1.82177200 |
| C | -1.34943900 | -0.93198100 | 1.09437200  |
| C | 1.05362700  | -1.43271200 | 1.54076000  |
| C | 1.03749400  | -0.34141100 | 2.59911900  |
| C | -0.37065900 | -0.16483500 | 3.16000100  |



|   |             |             |             |
|---|-------------|-------------|-------------|
| N | 0.03252400  | -1.13918700 | 0.49707000  |
| C | -0.01625300 | -2.24363500 | -0.52198100 |
| C | -2.62655300 | 0.46052800  | 2.57076500  |
| H | -5.70472200 | 0.43898400  | -0.45495200 |
| H | -4.26211000 | 1.12324900  | -1.20374100 |
| H | -3.39304600 | -1.98578000 | -3.17816400 |
| H | -2.87132200 | -0.33568600 | -2.83764500 |
| H | -5.35087200 | -0.61285400 | -2.64422100 |
| H | 2.02645500  | -1.52782400 | 1.05850200  |
| H | 1.74235300  | -0.60722700 | 3.38929800  |
| H | 1.36328800  | 0.60036200  | 2.15041400  |
| H | -0.38401700 | 0.66110300  | 3.87497400  |
| H | 1.01601300  | -2.43832900 | -0.81202900 |
| H | -0.39729900 | -3.11747200 | 0.01259200  |
| H | -2.50387400 | 1.24863300  | 3.31890400  |
| H | -3.05099300 | -0.41720900 | 3.09227600  |
| C | 2.74802300  | 1.50577100  | -0.50375100 |
| N | 1.49543700  | 1.54468600  | -0.69848200 |
| H | -1.84124100 | 0.46013500  | -0.63537300 |
| H | 0.28158600  | -0.25735900 | 0.01731900  |
| C | 0.79911200  | 2.84205000  | -0.79847100 |
| N | -1.28124900 | 0.13872100  | 2.06950800  |
| C | 1.71749700  | 4.05643900  | -0.95509500 |
| H | 2.37762900  | 3.95247600  | -1.81996400 |
| H | 1.09757900  | 4.94075200  | -1.10887000 |
| H | 2.32355200  | 4.23682600  | -0.06415200 |
| C | -0.04865500 | 2.99358200  | 0.46773400  |
| H | -0.68076300 | 3.88023000  | 0.38063300  |
| H | -0.67960100 | 2.11840100  | 0.62583400  |
| H | 0.59882600  | 3.11673900  | 1.34103400  |
| C | -0.10831500 | 2.72657700  | -2.02737200 |
| H | 0.49128200  | 2.59279300  | -2.93084900 |
| H | -0.78193200 | 1.87692300  | -1.91438100 |
| H | -0.70285100 | 3.63589100  | -2.13636700 |
| C | 3.47554100  | 0.21775100  | -0.46984800 |
| C | 3.10475200  | -0.82046500 | -1.32796100 |
| C | 4.54181900  | 0.03622900  | 0.41302000  |
| C | 3.77878400  | -2.03632200 | -1.28357900 |
| H | 2.29419400  | -0.65277100 | -2.02731100 |
| C | 5.20148500  | -1.18722500 | 0.47099500  |
| H | 4.84172900  | 0.84944800  | 1.06451600  |
| C | 4.82003000  | -2.22460000 | -0.37639800 |
| H | 3.49727500  | -2.83474100 | -1.95932600 |
| H | 6.01598300  | -1.32933700 | 1.16990100  |
| H | 5.34174800  | -3.17252100 | -0.33965300 |
| H | 3.35760800  | 2.40086800  | -0.35572400 |
| H | -0.53765000 | -1.01123900 | -2.20404800 |
| H | -0.79052700 | -2.74264800 | -2.43728300 |

|   |             |             |             |
|---|-------------|-------------|-------------|
| H | -4.54714800 | 1.19411300  | 1.98236900  |
| H | -3.21068900 | 1.80967700  | 1.00406800  |
| H | -5.11616900 | -1.80626700 | -1.37685200 |
| H | -4.26162400 | -1.05396100 | 0.92774900  |
| H | -2.73375400 | -2.65719900 | -0.86677500 |
| H | -1.56294600 | -1.90398800 | 1.58628700  |
| H | -0.67432100 | -1.08135100 | 3.70088300  |
| H | 0.77158400  | -2.39596100 | 1.97387500  |

| cat3_im2ets               | Energy (E)                     | Energy(E)+ZPE | Enthalpy (H) | Gibbs free energy (G) |
|---------------------------|--------------------------------|---------------|--------------|-----------------------|
| <b>IEFPCM</b>             | -1127.864561                   | -1127.244912  | -1127.218473 | -1127.298134          |
| Imaginary Frequency (one) | $\nu = 396.7i \text{ cm}^{-1}$ |               |              |                       |

|   |             |             |             |
|---|-------------|-------------|-------------|
| C | 0.03377900  | -2.28897700 | -1.59993200 |
| C | -3.30693400 | 0.62482500  | 0.82628200  |
| C | -1.45097000 | -1.95339300 | -1.56872400 |
| C | -3.20389000 | -0.40800700 | -0.28970200 |
| B | -1.64829800 | -0.79555400 | -0.45941200 |
| C | -3.73249100 | 0.04392200  | -1.65066500 |
| C | -2.03225200 | -1.44932800 | -2.88887000 |
| C | -3.50663300 | -1.04238600 | -2.71761500 |
| C | -1.03337400 | -1.26008900 | 0.96169800  |
| C | 0.91039000  | -2.11820700 | 2.11026500  |
| C | 0.72125400  | -1.06935900 | 3.19574300  |
| C | -0.75317200 | -0.70287800 | 3.29929500  |
| N | 0.42713800  | -1.59894200 | 0.81563300  |
| C | 0.51390600  | -2.68559500 | -0.19897700 |
| C | -2.66637800 | 0.08824200  | 2.11028500  |
| H | -4.80039200 | 0.30169400  | -1.62004800 |
| H | -3.19371200 | 0.95185300  | -1.95084400 |
| H | -1.95256700 | -2.19300800 | -3.69436200 |
| H | -1.45957300 | -0.56907800 | -3.20896600 |
| H | -3.91059800 | -0.70808200 | -3.67871200 |
| H | 1.95539000  | -2.41686900 | 2.03525300  |
| H | 1.08436300  | -1.45769300 | 4.14981400  |
| H | 1.30525800  | -0.17623500 | 2.95027100  |
| H | -0.90092100 | 0.09193300  | 4.03614300  |
| H | 1.54867600  | -3.03947100 | -0.21805700 |
| H | -0.09662800 | -3.52931100 | 0.15273100  |
| H | -2.75881600 | 0.82038600  | 2.92010300  |
| H | -3.23130000 | -0.80830200 | 2.42718400  |
| N | -1.23773800 | -0.25176400 | 2.00437100  |
| N | 2.21788000  | 0.16568500  | -0.25101400 |
| C | 3.52919800  | -0.48673400 | -0.60664900 |
| C | 2.03878400  | 1.37637800  | -0.65557300 |
| H | -1.01031100 | 0.20401400  | -0.83481700 |
| C | 3.39947800  | -1.23007800 | -1.93725400 |

|   |             |             |             |
|---|-------------|-------------|-------------|
| H | 3.09911100  | -0.54170200 | -2.73014400 |
| H | 4.36763100  | -1.66049300 | -2.20092000 |
| H | 2.66511600  | -2.03061600 | -1.88269300 |
| C | 3.89394400  | -1.45221700 | 0.51996500  |
| H | 3.88084500  | -0.94520300 | 1.48698900  |
| H | 3.21502400  | -2.29832900 | 0.55141800  |
| H | 4.89778800  | -1.84077800 | 0.34580300  |
| C | 4.66674100  | 0.54087000  | -0.71247000 |
| H | 5.60921300  | -0.00512100 | -0.75021200 |
| H | 4.62097600  | 1.14370700  | -1.62012000 |
| H | 4.68832900  | 1.19973100  | 0.15791400  |
| H | -4.07947900 | -1.93295900 | -2.43086500 |
| H | -2.00017200 | -2.86405900 | -1.27562700 |
| H | -3.77937800 | -1.29769500 | 0.01972900  |
| H | -1.50788900 | -2.21151500 | 1.30497000  |
| H | 0.32947400  | -3.01605800 | 2.36586000  |
| H | -1.31978400 | -1.58780200 | 3.64636800  |
| H | 1.37842900  | -0.50169400 | 0.27209100  |
| H | 2.81401900  | 1.77915400  | -1.29967700 |
| C | 1.01892100  | 2.35759600  | -0.34747300 |
| C | 1.11466400  | 3.56878600  | -1.05317500 |
| C | 0.05877700  | 2.20496600  | 0.65667700  |
| C | 0.25254700  | 4.61499700  | -0.77095600 |
| H | 1.86745400  | 3.68287600  | -1.82560200 |
| C | -0.78168300 | 3.27016100  | 0.95274300  |
| H | -0.06877000 | 1.26980400  | 1.19428900  |
| C | -0.69203400 | 4.46502700  | 0.24372700  |
| H | 0.32031800  | 5.54213000  | -1.32448500 |
| H | -1.52100200 | 3.15409500  | 1.73458200  |
| H | -1.35966700 | 5.28417700  | 0.48087400  |
| H | -2.79048900 | 1.53731200  | 0.51398200  |
| H | -4.34296200 | 0.90320200  | 1.06558200  |
| H | 0.57911600  | -1.40141400 | -1.93943000 |
| H | 0.29298200  | -3.11078900 | -2.28410100 |

| <b>cat3_im2hts</b>        | Energy (E)                     | Energy(E)+ZPE | Enthalpy (H) | Gibbs free energy (G) |
|---------------------------|--------------------------------|---------------|--------------|-----------------------|
| <b>IEFPCM</b>             | -1127.855072                   | -1127.236975  | -1127.210677 | -1127.288649          |
| Imaginary Frequency (one) | $\nu = 838.6i \text{ cm}^{-1}$ |               |              |                       |

|   |             |             |             |
|---|-------------|-------------|-------------|
| C | 1.42391200  | -2.50868200 | -1.05697400 |
| C | -2.71131300 | -0.48284300 | 1.12262100  |
| C | -0.06873400 | -2.75366600 | -0.87795300 |
| C | -2.24264600 | -1.63184900 | 0.23159000  |
| B | -0.66701400 | -1.58204100 | 0.02422400  |
| C | -2.94766100 | -1.77075800 | -1.11880700 |
| C | -0.85764900 | -2.82496800 | -2.18795300 |
| C | -2.36852200 | -2.94364600 | -1.92763800 |

|   |             |             |             |
|---|-------------|-------------|-------------|
| C | 0.12833400  | -1.33222000 | 1.39426900  |
| C | 2.37435900  | -0.84236100 | 2.26639900  |
| C | 1.78372500  | 0.33261100  | 3.03024400  |
| C | 0.31471800  | 0.06781400  | 3.34039800  |
| N | 1.57020600  | -1.08775700 | 1.04758700  |
| C | 2.12722700  | -2.23621900 | 0.27426600  |
| C | -1.83982700 | -0.37291000 | 2.37597800  |
| H | -4.02839000 | -1.91056100 | -0.99626000 |
| H | -2.81443600 | -0.84267600 | -1.68627900 |
| H | -0.52518600 | -3.65805500 | -2.81884000 |
| H | -0.66876100 | -1.90389400 | -2.75687500 |
| H | -2.89761300 | -3.03245200 | -2.88062100 |
| H | 3.40693800  | -0.65301600 | 1.97001300  |
| H | 2.34964000  | 0.48582700  | 3.95094400  |
| H | 1.86661400  | 1.22992500  | 2.41293800  |
| H | -0.12601600 | 0.93759200  | 3.83310400  |
| H | 3.18655000  | -2.01858800 | 0.11769800  |
| H | 2.05546800  | -3.11512800 | 0.92491200  |
| H | -2.16262300 | 0.48570500  | 2.97046500  |
| H | -1.98498700 | -1.27488200 | 3.00102700  |
| N | -0.40757900 | -0.18618300 | 2.10458100  |
| N | 1.48093600  | 1.05885500  | -0.47868500 |
| C | 2.65991600  | 1.34149500  | -1.32127500 |
| C | 0.30212500  | 0.90591500  | -1.08875300 |
| H | -0.32295300 | -0.42768600 | -0.71443000 |
| C | 2.96773800  | 0.34828700  | -2.45250300 |
| H | 2.10499900  | 0.17323300  | -3.09908000 |
| H | 3.76686600  | 0.74966600  | -3.07997500 |
| H | 3.30793200  | -0.61025100 | -2.05814100 |
| C | 3.86441700  | 1.38844900  | -0.37980000 |
| H | 3.66532800  | 2.08083000  | 0.44010800  |
| H | 4.06268600  | 0.39810800  | 0.03979600  |
| H | 4.76228200  | 1.71304500  | -0.91021500 |
| C | 2.46348200  | 2.73789100  | -1.93375400 |
| H | 3.36290400  | 3.06867500  | -2.45968700 |
| H | 1.63287600  | 2.72999400  | -2.64435700 |
| H | 2.22444200  | 3.45202100  | -1.14423400 |
| H | -3.74978600 | -0.61947900 | 1.44773900  |
| H | -2.66722100 | 0.46129300  | 0.58025500  |
| H | 1.55330800  | -1.64678600 | -1.71152900 |
| H | 1.94621400  | -3.34878400 | -1.53046900 |
| H | -2.55523900 | -3.87402300 | -1.37792400 |
| H | -0.21262000 | -3.70194800 | -0.33297800 |
| H | -2.41763200 | -2.57084500 | 0.78887700  |
| H | 0.13466000  | -2.23278500 | 2.05253500  |
| H | 2.34192000  | -1.75710000 | 2.86888400  |
| H | 0.23085600  | -0.78964400 | 4.03611500  |
| H | 1.58806900  | -0.12848900 | 0.42533100  |

|   |             |            |             |
|---|-------------|------------|-------------|
| H | 0.28834200  | 0.70114000 | -2.16823600 |
| C | -0.87056800 | 1.74327500 | -0.68990600 |
| C | -1.96473400 | 1.83415000 | -1.54998700 |
| C | -0.85243900 | 2.49725100 | 0.48253800  |
| C | -3.05508800 | 2.63315700 | -1.22274700 |
| H | -1.96247000 | 1.26672700 | -2.47491500 |
| C | -1.94559000 | 3.28806600 | 0.81544900  |
| H | 0.02374000  | 2.44076600 | 1.11232300  |
| C | -3.05174100 | 3.35276300 | -0.03107900 |
| H | -3.90249900 | 2.69441200 | -1.89408100 |
| H | -1.93451900 | 3.86481600 | 1.73249900  |
| H | -3.90019500 | 3.97308100 | 0.23032700  |

| <b>cat3_im2f</b>    | Energy (E)   | Energy(E)+ZPE | Enthalpy (H) | Gibbs free energy (G) |
|---------------------|--------------|---------------|--------------|-----------------------|
| <b>IEFPCM (THF)</b> | -1127.869768 | -1127.247914  | -1127.220907 | -1127.30261           |

|   |             |             |             |
|---|-------------|-------------|-------------|
| C | -0.21726400 | -2.63645900 | -1.03930000 |
| C | -3.44143700 | 1.07632500  | 0.28690000  |
| C | -1.61241300 | -2.08990500 | -1.32648300 |
| C | -3.29117900 | -0.13543300 | -0.63007300 |
| B | -1.81380800 | -0.75366000 | -0.45016800 |
| C | -3.55065000 | 0.11739900  | -2.11602700 |
| C | -1.90601000 | -1.75764700 | -2.78876300 |
| C | -3.31668700 | -1.16043500 | -2.94248700 |
| C | -1.47735400 | -1.00322000 | 1.10412400  |
| C | 0.25894700  | -1.74918100 | 2.61596000  |
| C | 0.11828900  | -0.44416600 | 3.38935400  |
| C | -1.30430900 | 0.08425900  | 3.25468100  |
| N | -0.10577600 | -1.52804800 | 1.22251500  |
| C | -0.01126300 | -2.79055100 | 0.47251600  |
| C | -3.01781800 | 0.73218700  | 1.71992800  |
| H | -4.56730800 | 0.48868000  | -2.30551300 |
| H | -2.86381300 | 0.89585800  | -2.47653700 |
| H | -1.81203500 | -2.63321500 | -3.44603400 |
| H | -1.16989000 | -1.02018600 | -3.13693000 |
| H | -3.52049500 | -0.95844200 | -3.99907700 |
| H | 1.29071000  | -2.11702900 | 2.66457200  |
| H | 0.36882300  | -0.59745600 | 4.44159100  |
| H | 0.81229000  | 0.29304000  | 2.97275600  |
| H | -1.40621100 | 1.04673600  | 3.76693600  |
| H | 0.97359600  | -3.22335900 | 0.68394700  |
| H | -0.75545000 | -3.50880000 | 0.85985400  |
| H | -3.11578600 | 1.61568800  | 2.36119300  |
| H | -3.71226700 | -0.03027800 | 2.11865000  |
| C | 2.40876500  | 1.59096500  | -0.49192100 |
| N | 1.14683600  | 1.72377100  | -0.29453400 |
| H | -0.94679900 | 0.08197000  | -0.85385400 |

|   |             |             |             |
|---|-------------|-------------|-------------|
| C | 0.41826100  | 3.03041700  | -0.34190300 |
| N | -1.63388300 | 0.25484200  | 1.84718300  |
| C | 1.37371600  | 4.20394400  | -0.52265300 |
| H | 1.88777400  | 4.18314200  | -1.48638000 |
| H | 0.77111100  | 5.11176100  | -0.49578300 |
| H | 2.10427900  | 4.27073000  | 0.28683200  |
| C | -0.32122200 | 3.15164600  | 0.99121100  |
| H | -1.01208200 | 3.99466200  | 0.93827800  |
| H | -0.87211800 | 2.23264600  | 1.21060400  |
| H | 0.39114400  | 3.33239400  | 1.80017900  |
| C | -0.54559700 | 2.95351600  | -1.52874800 |
| H | 0.01145800  | 2.90306200  | -2.46677000 |
| H | -1.18098200 | 2.07321000  | -1.45286400 |
| H | -1.16776000 | 3.84978100  | -1.53681200 |
| C | 3.20879600  | 0.38444100  | -0.46302200 |
| C | 4.53060600  | 0.51183100  | -0.91754200 |
| C | 2.72824100  | -0.84715600 | 0.00056400  |
| C | 5.36842800  | -0.59112700 | -0.93387500 |
| H | 4.89179500  | 1.47375900  | -1.26358900 |
| C | 3.58208600  | -1.94261700 | -0.01333100 |
| H | 1.70848200  | -0.93990700 | 0.38081900  |
| C | 4.88916100  | -1.81910400 | -0.48095800 |
| H | 6.38500400  | -0.49800700 | -1.29177800 |
| H | 3.22564200  | -2.90004000 | 0.34213700  |
| H | 5.54017000  | -2.68441500 | -0.48774600 |
| H | 2.94902200  | 2.50353100  | -0.71424900 |
| H | -4.47064900 | 1.45896600  | 0.32329500  |
| H | -2.81822500 | 1.90123600  | -0.07592900 |
| H | 0.53170000  | -1.93833700 | -1.43404400 |
| H | -0.02657900 | -3.61007200 | -1.51155100 |
| H | -4.04578100 | -1.91503000 | -2.62266600 |
| H | -4.01947000 | -0.89184800 | -0.29143000 |
| H | -2.34252200 | -2.84912500 | -0.99886000 |
| H | -2.00114700 | -0.62541800 | 3.73951000  |
| H | -2.16408900 | -1.75987000 | 1.56534200  |
| H | -0.39010800 | -2.51772200 | 3.07433300  |
| H | 0.52480500  | 0.90247700  | -0.14663900 |

| cat3_im2gts               | Energy (E)   | Energy(E)+ZPE                 | Enthalpy (H) | Gibbs free energy (G) |
|---------------------------|--------------|-------------------------------|--------------|-----------------------|
| IEFPCM (THF)              | -1127.865387 | -1127.243945                  | -1127.21755  | -1127.296217          |
| Imaginary Frequency (one) |              | $\nu = 32.9i \text{ cm}^{-1}$ |              |                       |

|   |             |             |             |
|---|-------------|-------------|-------------|
| C | 1.34291100  | -2.37871900 | -0.69343000 |
| C | -3.26255900 | -0.18798900 | -0.46792000 |
| C | -0.01237900 | -2.32302900 | -1.39067000 |
| C | -2.41068900 | -1.16568900 | -1.27359000 |
| B | -0.92712900 | -1.22516900 | -0.65334000 |

|   |             |             |             |
|---|-------------|-------------|-------------|
| C | -2.31852900 | -0.90234900 | -2.77728000 |
| C | 0.01820100  | -2.00583900 | -2.88548000 |
| C | -1.40788900 | -1.93844900 | -3.46224000 |
| C | -0.97675900 | -1.47498900 | 0.93646000  |
| C | 0.37452100  | -1.72674900 | 2.91627000  |
| C | -0.45604900 | -0.65542900 | 3.61130000  |
| C | -1.85992900 | -0.63054900 | 3.02261000  |
| N | 0.39015100  | -1.48407900 | 1.48019000  |
| C | 1.17225100  | -2.54212900 | 0.82126000  |
| C | -3.16227900 | -0.47876900 | 1.03300000  |
| H | -3.30335900 | -0.91039900 | -3.26412000 |
| H | -1.89560900 | 0.09745100  | -2.94680000 |
| H | 0.60302100  | -2.73837900 | -3.45852000 |
| H | 0.50657100  | -1.03131900 | -3.02844000 |
| H | -1.36391900 | -1.73593900 | -4.53735000 |
| H | 1.40294100  | -1.72604900 | 3.29572000  |
| H | -0.50307900 | -0.85000900 | 4.68534000  |
| H | 0.01468100  | 0.32286100  | 3.46600000  |
| H | -2.45268900 | 0.17410100  | 3.46981000  |
| H | 2.15585100  | -2.56591900 | 1.30425000  |
| H | 0.69684100  | -3.52119900 | 1.01742000  |
| H | -3.75956900 | 0.24865100  | 1.59417000  |
| H | -3.60150900 | -1.47369900 | 1.23001000  |
| N | -1.79720900 | -0.43273900 | 1.57912000  |
| H | -0.35728900 | -0.06897900 | -0.82820000 |
| H | -4.32463900 | -0.22110000 | -0.74605000 |
| H | -2.92843000 | 0.83748100  | -0.64479000 |
| H | 1.89285100  | -1.45615900 | -0.89277000 |
| H | 1.97184100  | -3.20664900 | -1.04829000 |
| H | -1.86945900 | -2.92692900 | -3.34993000 |
| H | -0.49496900 | -3.30750900 | -1.26565000 |
| H | -2.85555900 | -2.16703900 | -1.14172000 |
| H | -1.44705900 | -2.46645900 | 1.17314000  |
| H | -0.05645900 | -2.72040900 | 3.14106000  |
| H | -2.36348900 | -1.58621900 | 3.25986000  |
| C | 0.81390000  | 1.41654100  | 0.25481000  |
| N | 0.50847000  | 2.58968100  | -0.21532000 |
| C | -0.79303000 | 3.30202100  | -0.18819000 |
| C | -1.60409000 | 2.84959100  | 1.02054000  |
| H | -1.16471000 | 3.25880100  | 1.93422000  |
| H | -2.62137000 | 3.23061100  | 0.92776000  |
| H | -1.63616000 | 1.76148100  | 1.11523000  |
| C | -1.47674000 | 2.98667100  | -1.52133000 |
| H | -2.48426000 | 3.40471100  | -1.53091000 |
| H | -0.91475000 | 3.42751100  | -2.34901000 |
| H | -1.53298000 | 1.90977100  | -1.67095000 |
| C | -0.47438000 | 4.79354100  | -0.09204000 |
| H | 0.05691000  | 5.02148100  | 0.83321000  |

|   |             |             |             |
|---|-------------|-------------|-------------|
| H | 0.12737000  | 5.12862100  | -0.94153000 |
| H | -1.40819000 | 5.35635100  | -0.10339000 |
| C | 2.16732000  | 0.91506100  | 0.00240000  |
| C | 2.85689100  | 0.28881200  | 1.04271000  |
| C | 2.77743000  | 1.08951200  | -1.24397000 |
| C | 4.16303100  | -0.13790800 | 0.84016000  |
| H | 2.35432100  | 0.12440100  | 1.98549000  |
| C | 4.07436000  | 0.63829200  | -1.44648000 |
| H | 2.21202000  | 1.50267100  | -2.07229000 |
| C | 4.76880100  | 0.03122200  | -0.40230000 |
| H | 4.70143100  | -0.62037800 | 1.64568000  |
| H | 4.53587000  | 0.74143200  | -2.41977000 |
| H | 5.77844100  | -0.32485800 | -0.56286000 |
| H | 0.15696000  | 0.88977100  | 0.94416000  |
| H | 1.21147000  | 3.02718100  | -0.79997000 |

| <b>cat3_am2</b>     | <b>Energy (E)</b> | <b>Energy(E)+ZPE</b> | <b>Enthalpy (H)</b> | <b>Gibbs free energy (G)</b> |
|---------------------|-------------------|----------------------|---------------------|------------------------------|
| <b>IEFPCM (THF)</b> | -1127.920956      | -1127.297385         | -1127.269178        | -1127.3551                   |

|   |             |             |             |
|---|-------------|-------------|-------------|
| C | -0.82456100 | -2.37723900 | -1.80917300 |
| C | 0.90099400  | -0.74482600 | 2.62644500  |
| C | -0.98604300 | -2.68748800 | -0.31897200 |
| C | -0.04666200 | -1.81978400 | 2.08528900  |
| B | 0.13972700  | -2.02500100 | 0.54390700  |
| C | -1.51569600 | -1.63335600 | 2.48758200  |
| C | -2.39209200 | -2.42720600 | 0.23783900  |
| C | -2.44381300 | -2.61133500 | 1.75868100  |
| C | 1.55931200  | -1.75901800 | -0.10721100 |
| C | 2.80107500  | -1.42370900 | -2.12701600 |
| C | 3.62950300  | -0.35329900 | -1.43017700 |
| C | 3.66274300  | -0.61557800 | 0.06965800  |
| N | 1.46833700  | -1.47620700 | -1.53990000 |
| C | 0.63875100  | -2.46214200 | -2.23026900 |
| C | 2.29875900  | -0.90047400 | 2.03395600  |
| H | -1.62871300 | -1.73860200 | 3.57155300  |
| H | -1.82232900 | -0.61325400 | 2.23546000  |
| H | -3.11896700 | -3.08723800 | -0.24682100 |
| H | -2.68716400 | -1.40107800 | -0.00654900 |
| H | -3.46932700 | -2.47064100 | 2.10943800  |
| H | 2.70853300  | -1.20150200 | -3.19262000 |
| H | 4.64486500  | -0.34144400 | -1.83196400 |
| H | 3.17141900  | 0.62156900  | -1.61323200 |
| H | 4.18474200  | 0.19247800  | 0.58898000  |
| H | 0.72848000  | -2.26820200 | -3.30174700 |
| H | 1.01883800  | -3.48668600 | -2.05553000 |
| H | 2.96986900  | -0.15369800 | 2.46552300  |
| H | 2.71130200  | -1.89392800 | 2.29170800  |



|   |             |             |             |
|---|-------------|-------------|-------------|
| C | -0.23062700 | 1.59253600  | -1.06456600 |
| N | 0.51427300  | 1.85575000  | 0.15697400  |
| H | 1.25674600  | 1.16648700  | 0.24767000  |
| C | 1.04929200  | 3.20605300  | 0.36295500  |
| N | 2.30099700  | -0.69970800 | 0.58432900  |
| C | 1.69764600  | 3.20329500  | 1.74828200  |
| H | 2.49136000  | 2.45101800  | 1.79255000  |
| H | 2.13752600  | 4.17676900  | 1.97581400  |
| H | 0.95291600  | 2.96156300  | 2.50880700  |
| C | 2.11334600  | 3.58612200  | -0.68017800 |
| H | 2.95493400  | 2.89004300  | -0.62728900 |
| H | 1.70696700  | 3.55697900  | -1.69318100 |
| H | 2.49402600  | 4.59479600  | -0.50177400 |
| C | -0.08910500 | 4.22712900  | 0.33983200  |
| H | -0.58788800 | 4.25154900  | -0.63138100 |
| H | -0.83480300 | 3.98026400  | 1.09684100  |
| H | 0.30183200  | 5.22661300  | 0.54275600  |
| C | -1.72578000 | 1.42030000  | -0.84916700 |
| C | -2.29679400 | 1.45392600  | 0.42052700  |
| C | -2.55533500 | 1.18885400  | -1.95024200 |
| C | -3.66735700 | 1.25999000  | 0.58905700  |
| H | -1.64377600 | 1.62864200  | 1.26590900  |
| C | -3.92113200 | 0.98827400  | -1.78613200 |
| H | -2.12165900 | 1.16244100  | -2.94543500 |
| C | -4.48410800 | 1.02415300  | -0.51160500 |
| H | -4.09477700 | 1.28987800  | 1.58457600  |
| H | -4.54774200 | 0.80628100  | -2.65104700 |
| H | -5.54795200 | 0.86957000  | -0.38064700 |
| H | -0.08350800 | 2.37421800  | -1.82072400 |
| H | 0.15838400  | 0.66850100  | -1.50552500 |
| H | 0.52253500  | 0.24325100  | 2.34821500  |
| H | 0.96157700  | -0.78488800 | 3.71872700  |
| H | -1.19202600 | -1.36668400 | -2.01080900 |
| H | -1.41967700 | -3.06434600 | -2.41905100 |
| H | -2.16111000 | -3.64078500 | 2.01171300  |
| H | -0.76397400 | -3.76374000 | -0.17922200 |
| H | 0.29018900  | -2.79505900 | 2.48642000  |
| H | 3.30617400  | -2.40343400 | -2.02963000 |
| H | 2.12262500  | -2.72802300 | 0.03026300  |
| H | 4.21176400  | -1.55459000 | 0.26952500  |

| <b>cat3_im1d</b>    | <b>Energy (E)</b> | <b>Energy(E)+ZPE</b> | <b>Enthalpy (H)</b> | <b>Gibbs free energy (G)</b> |
|---------------------|-------------------|----------------------|---------------------|------------------------------|
| <b>IEFPCM (THF)</b> | -857.486779       | -856.975431          | -856.952915         | -857.025555                  |

|   |             |             |             |
|---|-------------|-------------|-------------|
| C | -0.07716800 | -1.54183100 | 1.92640700  |
| C | -2.42192000 | 1.00884000  | -1.75090600 |
| C | -1.46964000 | -1.35891100 | 1.32594900  |
| C | -2.72033700 | -0.01123500 | -0.65394800 |

|   |             |             |             |
|---|-------------|-------------|-------------|
| B | -1.33809900 | -0.29378500 | 0.11797500  |
| C | -3.26970700 | -1.35168300 | -1.14063300 |
| C | -2.07668800 | -2.63813200 | 0.74737300  |
| C | -3.40441000 | -2.34621500 | 0.02616800  |
| C | -0.69664100 | 1.10327000  | 0.62808000  |
| C | 1.39024300  | 1.99154600  | 1.67331500  |
| C | 1.46797300  | 3.00745600  | 0.54320600  |
| C | 0.07804200  | 3.28782600  | -0.01939500 |
| N | 0.65600400  | 0.78013400  | 1.22530200  |
| C | 0.50928900  | -0.19680700 | 2.35372800  |
| C | -1.78831900 | 2.27154500  | -1.15932000 |
| H | -4.24113200 | -1.24630400 | -1.64172200 |
| H | -2.57346800 | -1.76811800 | -1.87986800 |
| H | -2.23959500 | -3.40642200 | 1.51522200  |
| H | -1.37014300 | -3.05868700 | 0.02009200  |
| H | -3.83788900 | -3.28404500 | -0.33491100 |
| H | 2.38223700  | 1.68236700  | 2.00836000  |
| H | 1.92669900  | 3.92237700  | 0.92329100  |
| H | 2.10192200  | 2.61104400  | -0.25314100 |
| H | 0.15314100  | 3.97427700  | -0.86590500 |
| H | 1.50077500  | -0.30651800 | 2.79905600  |
| H | -0.14293800 | 0.28617500  | 3.08657700  |
| H | -1.59126200 | 3.00196700  | -1.94918500 |
| H | -2.50872700 | 2.73684500  | -0.46172800 |
| C | 3.13852100  | -1.32514300 | -0.74869500 |
| N | 2.38157900  | -0.30594000 | -0.83177300 |
| H | -0.51717400 | -0.75792200 | -0.69124000 |
| H | 1.22174500  | 0.33091000  | 0.46631700  |
| N | -0.50970100 | 2.03708000  | -0.46946800 |
| H | -4.11348700 | -1.93411500 | 0.75465800  |
| H | -3.46327200 | 0.43237300  | 0.03058700  |
| H | -2.13915000 | -0.98516800 | 2.11855300  |
| H | -1.24781200 | 1.58597100  | 1.46256800  |
| H | -0.54787600 | 3.77499000  | 0.75210100  |
| H | 0.83781700  | 2.39703000  | 2.52538500  |
| C | 1.87087300  | 0.08785500  | -2.14371900 |
| H | 1.09551300  | 0.83757000  | -1.99438700 |
| H | 2.67776800  | 0.50874800  | -2.75299100 |
| H | 1.43062300  | -0.75591500 | -2.68001200 |
| C | 3.65060600  | -1.75239000 | 0.59848300  |
| H | 4.74315800  | -1.77681800 | 0.59758500  |
| H | 3.30598100  | -1.06796700 | 1.37145900  |
| H | 3.30249000  | -2.76279800 | 0.82827500  |
| C | 3.55472000  | -2.17227900 | -1.92712800 |
| H | 2.68949300  | -2.71838300 | -2.31214800 |
| H | 3.93729500  | -1.55263900 | -2.73975600 |
| H | 4.31803300  | -2.89395200 | -1.64089100 |
| H | -1.71991200 | 0.57108100  | -2.46923100 |

|   |             |             |             |
|---|-------------|-------------|-------------|
| H | -3.31642600 | 1.31447800  | -2.30979400 |
| H | 0.58320500  | -1.99060900 | 1.17519000  |
| H | -0.05492400 | -2.19408500 | 2.80954300  |

| <b>cat3_im1hts</b>        | Energy (E)  | Energy(E)+ZPE                  | Enthalpy (H) | Gibbs free energy (G) |
|---------------------------|-------------|--------------------------------|--------------|-----------------------|
| <b>IEFPCM (THF)</b>       | -857.457261 | -856.94913                     | -856.927902  | -856.99516            |
| Imaginary Frequency (one) |             | $\nu = 232.7i \text{ cm}^{-1}$ |              |                       |

|   |             |             |             |
|---|-------------|-------------|-------------|
| C | -0.60792700 | 1.36551800  | -2.05554400 |
| C | -0.86827600 | -2.49296200 | 1.25424200  |
| C | -1.48576200 | 0.18923000  | -1.64193200 |
| C | -1.63166600 | -1.80654200 | 0.12557100  |
| B | -0.80947100 | -0.52091700 | -0.37008100 |
| C | -3.06367100 | -1.37440900 | 0.43848400  |
| C | -2.93046300 | 0.54615500  | -1.28909400 |
| C | -3.70369700 | -0.68489500 | -0.78031900 |
| C | 0.74024100  | -0.87810100 | -0.65292600 |
| C | 2.88797600  | 0.03885500  | -1.32184100 |
| C | 3.53438700  | -0.67061700 | -0.13970000 |
| C | 2.73474200  | -1.91867100 | 0.21280800  |
| N | 1.48970900  | 0.35263200  | -1.01626700 |
| C | 0.86018400  | 0.94871100  | -2.21565800 |
| C | 0.58396000  | -2.75673900 | 0.84080300  |
| H | -3.69601700 | -2.21624200 | 0.74940800  |
| H | -3.04399400 | -0.66658300 | 1.27927900  |
| H | -3.47078800 | 0.98790900  | -2.13677800 |
| H | -2.91829800 | 1.30580400  | -0.49406600 |
| H | -4.73355900 | -0.39866500 | -0.54547700 |
| H | 3.41782300  | 0.96579200  | -1.56201800 |
| H | 4.56450100  | -0.93701900 | -0.38602600 |
| H | 3.55481200  | -0.00049700 | 0.72496300  |
| H | 3.16175900  | -2.41118400 | 1.09080200  |
| H | 1.47173600  | 1.80825900  | -2.50958400 |
| H | 0.92195600  | 0.21791800  | -3.03924300 |
| H | 1.11952000  | -3.25803400 | 1.65251700  |
| H | 0.57999100  | -3.45219900 | -0.01929400 |
| N | 1.35393100  | -1.55341900 | 0.49416100  |
| N | 0.86772300  | 2.17575200  | 0.92056000  |
| C | -0.02912900 | 1.67066900  | 1.73327700  |
| H | -0.86263100 | 0.36864200  | 0.59331300  |
| H | -3.76178900 | -1.41569400 | -1.59588600 |
| H | -1.50318700 | -0.53442600 | -2.47383700 |
| H | -1.67436900 | -2.51643000 | -0.71855100 |
| H | 0.81470800  | -1.56383900 | -1.53685100 |
| H | 2.93647400  | -0.61458400 | -2.20933100 |
| H | 2.78718400  | -2.63341700 | -0.63021300 |

|   |             |             |             |
|---|-------------|-------------|-------------|
| H | 1.39679900  | 1.44402700  | 0.35380700  |
| C | 0.75939200  | 3.48226300  | 0.28960900  |
| H | 1.07964300  | 4.25713900  | 0.98849500  |
| H | 1.42200700  | 3.49435700  | -0.57316600 |
| H | -0.25013400 | 3.71075700  | -0.04910700 |
| C | -1.23607600 | 2.47248900  | 2.11614100  |
| H | -1.72362300 | 2.90685800  | 1.24565100  |
| H | -1.94651400 | 1.83517500  | 2.63642200  |
| H | -0.93025300 | 3.28196100  | 2.78742900  |
| C | 0.39719600  | 0.57011700  | 2.64997100  |
| H | 0.93729000  | 1.04874300  | 3.47582000  |
| H | -0.47191300 | 0.05308600  | 3.04784500  |
| H | 1.04216800  | -0.14307900 | 2.13318900  |
| H | -0.68841000 | 2.14092000  | -1.29024800 |
| H | -0.92155500 | 1.82681300  | -3.00122400 |
| H | -0.87756000 | -1.86467000 | 2.14922100  |
| H | -1.31443100 | -3.45419300 | 1.54060800  |

| <b>cat3_am1</b>     | <b>Energy (E)</b> | <b>Energy(E)+ZPE</b> | <b>Enthalpy (H)</b> | <b>Gibbs free energy (G)</b> |
|---------------------|-------------------|----------------------|---------------------|------------------------------|
| <b>IEFPCM (THF)</b> | -857.457261       | -856.94913           | -856.927902         | -856.99516                   |

|   |             |             |             |
|---|-------------|-------------|-------------|
| C | -0.88286100 | -1.09090700 | -2.39071600 |
| C | -0.57610800 | -0.39002900 | 2.61700400  |
| C | -1.68324700 | -1.37349900 | -1.11562600 |
| C | -1.52170200 | -0.99669200 | 1.57558400  |
| B | -0.82596900 | -1.18987100 | 0.18566500  |
| C | -2.87014300 | -0.27409900 | 1.45569400  |
| C | -3.03789900 | -0.65434300 | -1.04746300 |
| C | -3.72029800 | -0.83630900 | 0.31209200  |
| C | 0.74355600  | -1.39521600 | 0.11608200  |
| C | 2.69730000  | -1.30496100 | -1.27180900 |
| C | 3.45549300  | -0.61953800 | -0.14370500 |
| C | 2.85058400  | -1.01173400 | 1.19684200  |
| N | 1.27766900  | -0.98658800 | -1.18394200 |
| C | 0.54370900  | -1.61780000 | -2.27812500 |
| C | 0.82228100  | -0.98832200 | 2.49889100  |
| H | -3.41819500 | -0.33150600 | 2.40138400  |
| H | -2.67903500 | 0.78936000  | 1.26866800  |
| H | -3.69341700 | -1.00184500 | -1.85236300 |
| H | -2.87792600 | 0.41738600  | -1.21822700 |
| H | -4.69717400 | -0.34670800 | 0.30083000  |
| H | 3.07198400  | -0.97121000 | -2.24234900 |
| H | 4.51095400  | -0.89776100 | -0.17781500 |
| H | 3.37726700  | 0.46370200  | -0.26605900 |
| H | 3.33651400  | -0.46991500 | 2.01144700  |
| H | 1.08674500  | -1.40506000 | -3.20174800 |
| H | 0.52925200  | -2.71814800 | -2.15879500 |
| H | 1.47217200  | -0.56361000 | 3.26728400  |

|   |             |             |             |
|---|-------------|-------------|-------------|
| H | 0.78679200  | -2.08043400 | 2.67172700  |
| C | -0.24045300 | 2.27863900  | -0.60702900 |
| N | 0.44532300  | 2.28512400  | 0.68489400  |
| H | 0.98378800  | 1.42580700  | 0.76715900  |
| N | 1.42921400  | -0.68977500 | 1.20164800  |
| H | -0.69349400 | 1.28201000  | -0.68034100 |
| H | -3.90400400 | -1.90343000 | 0.48659900  |
| H | -1.88355200 | -2.46225700 | -1.08694400 |
| H | -1.72735400 | -2.04300800 | 1.87386600  |
| H | 2.85529900  | -2.39863100 | -1.20796200 |
| H | 0.91933500  | -2.50227100 | 0.24657700  |
| H | 3.00458200  | -2.09306200 | 1.37122500  |
| C | 1.29797100  | 3.43394500  | 0.94549200  |
| H | 1.73426200  | 3.32513000  | 1.93961900  |
| H | 2.12148200  | 3.57258300  | 0.23067800  |
| H | 0.70526900  | 4.35093200  | 0.95190400  |
| C | -1.37456500 | 3.30166900  | -0.62480900 |
| H | -1.97755400 | 3.18855300  | -1.52848000 |
| H | -2.01282400 | 3.17151300  | 0.24998700  |
| H | -0.98467800 | 4.32234400  | -0.61716500 |
| C | 0.67630800  | 2.45382600  | -1.82251000 |
| H | 1.46336100  | 1.69790600  | -1.80754800 |
| H | 0.10848500  | 2.33893000  | -2.74943300 |
| H | 1.12745200  | 3.44874700  | -1.83599600 |
| H | -0.83473000 | -0.01149900 | -2.56102300 |
| H | -1.36884600 | -1.53406900 | -3.26556300 |
| H | -0.95714000 | -0.54732200 | 3.63094600  |
| H | -0.50023300 | 0.68709200  | 2.44605500  |

| cat4                | Energy (E)   | Energy(E)+ZPE | Enthalpy (H) | Gibbs free energy (G) |
|---------------------|--------------|---------------|--------------|-----------------------|
| <b>IEFPCM (THF)</b> | -1040.799133 | -1040.470943  | -1040.453825 | -1040.513407          |

|   |             |             |             |
|---|-------------|-------------|-------------|
| C | -2.48455900 | -0.47293100 | 0.04320900  |
| C | 2.48455300  | -0.47296800 | 0.04320900  |
| C | -1.35215900 | -1.32951800 | -0.46553700 |
| C | 1.35214100  | -1.32953800 | -0.46553900 |
| B | -0.00000300 | -0.53728400 | -0.41836900 |
| C | 1.27088900  | -2.72409300 | 0.17221000  |
| C | -1.27093400 | -2.72407800 | 0.17220100  |
| C | -0.00002500 | -3.46003300 | -0.26401800 |
| C | 0.00000700  | 1.03725200  | -0.52302900 |
| C | -1.24592700 | 3.05265300  | -0.12901000 |
| C | 0.00002800  | 3.69014800  | 0.46995100  |
| N | 1.20032300  | 1.61159300  | 0.07895300  |
| C | 1.24597300  | 3.05263400  | -0.12901000 |
| N | -1.20029900 | 1.61161100  | 0.07895400  |
| C | -2.40646000 | 0.97222000  | -0.40984200 |

|   |             |             |             |
|---|-------------|-------------|-------------|
| C | 2.40647500  | 0.97218400  | -0.40984300 |
| H | 2.16078900  | -3.30227500 | -0.08428900 |
| H | 1.26563300  | -2.60914100 | 1.25870100  |
| H | -2.16083900 | -3.30224600 | -0.08431300 |
| H | -1.26568900 | -2.60913400 | 1.25869200  |
| H | -0.00002200 | -3.57975500 | -1.35401300 |
| H | -0.00003300 | -4.46552200 | 0.16176800  |
| H | -2.14549400 | 3.44628900  | 0.34879000  |
| H | 0.00003600  | 4.76517800  | 0.27975900  |
| H | 0.00002600  | 3.52069000  | 1.54759500  |
| H | 2.14554500  | 3.44625700  | 0.34879200  |
| H | -3.27401900 | 1.48797900  | 0.00461700  |
| H | -2.49292300 | 0.99216600  | -1.51115600 |
| H | 3.27404200  | 1.48793100  | 0.00461500  |
| H | 2.49293700  | 0.99212800  | -1.51115800 |
| H | -1.30316500 | 3.29180500  | -1.20805500 |
| H | 1.30321600  | 3.29178700  | -1.20805500 |
| H | -1.53306200 | -1.44395700 | -1.54791700 |
| H | 1.53304900  | -1.44399100 | -1.54791600 |
| H | 0.00000900  | 1.26608800  | -1.63122300 |
| F | -2.49793500 | -0.50311500 | 1.41067500  |
| F | -3.69529200 | -0.97972300 | -0.36447700 |
| F | 3.69527900  | -0.97977700 | -0.36447700 |
| F | 2.49792800  | -0.50315000 | 1.41067400  |

| <b>cat4_bts</b>           | Energy ( <b>E</b> ) | Energy( <b>E</b> )+ZPE          | Enthalpy ( <b>H</b> ) | Gibbs free energy ( <b>G</b> ) |
|---------------------------|---------------------|---------------------------------|-----------------------|--------------------------------|
| <b>IEFPCM (THF)</b>       | -1041.948879        | -1041.603506                    | -1041.586511          | -1041.645361                   |
| Imaginary Frequency (one) |                     | $\nu = 1206.5i \text{ cm}^{-1}$ |                       |                                |

|   |             |             |             |
|---|-------------|-------------|-------------|
| C | -2.57828700 | -0.04039300 | -0.07274000 |
| C | 2.38153200  | -0.90515900 | 0.00317400  |
| C | -1.56818000 | -1.07658300 | -0.49296400 |
| C | 1.08201800  | -1.55544800 | -0.37691900 |
| B | -0.09983100 | -0.50479600 | -0.19707800 |
| C | 0.76450100  | -2.87561400 | 0.32755700  |
| C | -1.75634400 | -2.43650900 | 0.19527700  |
| C | -0.60476500 | -3.39827300 | -0.13155200 |
| C | 0.20251200  | 1.00655500  | -0.67196000 |
| C | -0.64582200 | 3.17998300  | 0.20039200  |
| C | 0.77985600  | 3.53773400  | 0.59661800  |
| N | 1.50176200  | 1.38140900  | -0.15538400 |
| C | 1.77681100  | 2.79906600  | -0.29072400 |
| N | -0.83454000 | 1.72016100  | 0.12426800  |
| C | -2.17841300 | 1.39587500  | -0.39112100 |
| C | 2.55925600  | 0.48666300  | -0.59194100 |
| H | 1.53992400  | -3.61960400 | 0.12825400  |

|   |             |             |             |
|---|-------------|-------------|-------------|
| H | 0.74658000  | -2.70714100 | 1.40847400  |
| H | -2.71349000 | -2.88449100 | -0.08528000 |
| H | -1.78273800 | -2.27578400 | 1.27654100  |
| H | -0.57541500 | -3.57601200 | -1.21314300 |
| H | -0.80289800 | -4.36416100 | 0.33897000  |
| H | -1.36647200 | 3.57791800  | 0.91649000  |
| H | 0.90809400  | 4.61898800  | 0.51694300  |
| H | 0.95789100  | 3.23988400  | 1.63126100  |
| H | 2.79596500  | 2.99877800  | 0.04441700  |
| H | -2.90801500 | 2.05073700  | 0.08540900  |
| H | -2.21753800 | 1.54929100  | -1.47467000 |
| H | 3.51560800  | 0.87037600  | -0.23414000 |
| H | 2.62047000  | 0.38138000  | -1.68680600 |
| H | -0.87435100 | 3.60623000  | -0.78673500 |
| H | 1.68924300  | 3.14334300  | -1.33689500 |
| H | -1.68101500 | -1.19335600 | -1.57833900 |
| H | 1.15270400  | -1.74446900 | -1.45842100 |
| H | 0.07613100  | 1.25199400  | -1.74380600 |
| H | -0.15659600 | -0.19057200 | 1.18338100  |
| H | -0.51369200 | 0.70237700  | 1.04243700  |
| F | -2.78671600 | -0.09809100 | 1.28608100  |
| F | -3.80822300 | -0.24436600 | -0.64916700 |
| F | 2.48239700  | -0.81150700 | 1.36667400  |
| F | 3.46033700  | -1.66049100 | -0.40244700 |

| <b>cat4_c</b>       | <b>Energy (E)</b> | <b>Energy(E)+ZPE</b> | <b>Enthalpy (H)</b> | <b>Gibbs free energy (G)</b> |
|---------------------|-------------------|----------------------|---------------------|------------------------------|
| <b>IEFPCM (THF)</b> | -1041.993455      | -1041.640874         | -1041.62371         | -1041.682849                 |

|   |             |             |             |
|---|-------------|-------------|-------------|
| C | -2.48898900 | -0.55576700 | 0.00671300  |
| C | 2.50667700  | -0.46470000 | 0.05866400  |
| C | -1.31358500 | -1.35298800 | -0.45674300 |
| C | 1.36672900  | -1.31280000 | -0.41964100 |
| B | 0.01612600  | -0.56002400 | 0.02934900  |
| C | 1.33566600  | -2.74321300 | 0.12149900  |
| C | -1.24507700 | -2.78173200 | 0.09109000  |
| C | 0.06133700  | -3.46407700 | -0.35024900 |
| C | 0.03086300  | 0.97692300  | -0.48576800 |
| C | -1.29294000 | 3.07771200  | -0.07122900 |
| C | 0.00405200  | 3.74711300  | 0.35827500  |
| N | 1.18939400  | 1.66846400  | 0.03205200  |
| C | 1.20099800  | 3.07973900  | -0.31348500 |
| N | -1.21087300 | 1.60174600  | 0.13098000  |
| C | -2.43230800 | 0.92001700  | -0.39174000 |
| C | 2.41698400  | 0.99260200  | -0.38854700 |
| H | 2.21702500  | -3.31184900 | -0.19045400 |
| H | 1.34326400  | -2.70103700 | 1.21441800  |

|   |             |             |             |
|---|-------------|-------------|-------------|
| H | -2.10189900 | -3.38045800 | -0.23361400 |
| H | -1.27263300 | -2.73530100 | 1.18354200  |
| H | 0.07447100  | -3.52383700 | -1.44553100 |
| H | 0.06868900  | -4.49340800 | 0.01763000  |
| H | -2.15725200 | 3.45058000  | 0.47997400  |
| H | -0.05277100 | 4.80561700  | 0.09886200  |
| H | 0.12137500  | 3.66778600  | 1.44127100  |
| H | 2.12540600  | 3.52946200  | 0.05267000  |
| H | -3.30975000 | 1.42488200  | 0.01161700  |
| H | -2.41715700 | 1.00984300  | -1.47733000 |
| H | 3.26850300  | 1.51827100  | 0.04645900  |
| H | 2.53180900  | 1.00278200  | -1.48448900 |
| H | -1.46687800 | 3.22024600  | -1.14025900 |
| H | 1.15881500  | 3.23709600  | -1.40700200 |
| H | -1.38212800 | -1.38274500 | -1.55371300 |
| H | 1.45157900  | -1.34268300 | -1.51571700 |
| H | -0.10246500 | 1.14728800  | -1.57358800 |
| H | -0.01386200 | -0.46711500 | 1.25272300  |
| H | -1.11970700 | 1.37333000  | 1.12788000  |
| F | -2.61305400 | -0.57155800 | 1.37731900  |
| F | -3.69862700 | -1.00232500 | -0.47862700 |
| F | 2.60509100  | -0.49155800 | 1.42432500  |
| F | 3.72912900  | -0.91823300 | -0.40594500 |

| <b>cat4_im2d</b>    | <b>Energy (E)</b> | <b>Energy(E)+ZPE</b> | <b>Enthalpy (H)</b> | <b>Gibbs free energy (G)</b> |
|---------------------|-------------------|----------------------|---------------------|------------------------------|
| <b>IEFPCM (THF)</b> | -1525.017773      | -1524.424863         | -1524.394336        | -1524.483293                 |

|   |             |             |             |
|---|-------------|-------------|-------------|
| C | -0.29190400 | 2.50813600  | 0.41804100  |
| C | -3.51646100 | -1.12029700 | -0.77360000 |
| C | -1.75796500 | 2.25878100  | 0.27942900  |
| C | -3.48634200 | 0.32004200  | -0.36064700 |
| B | -1.93700500 | 0.69865700  | -0.12846200 |
| C | -4.26969800 | 0.65933400  | 0.90868900  |
| C | -2.59425500 | 2.52431800  | 1.53363000  |
| C | -4.06305700 | 2.13613600  | 1.28769300  |
| C | -1.05729500 | 0.30200300  | -1.42693300 |
| C | 1.33222100  | 0.17823500  | -2.14491000 |
| C | 1.10392900  | -1.28745000 | -2.47846300 |
| C | -0.35946000 | -1.53489500 | -2.83372000 |
| N | 0.38724200  | 0.59807400  | -1.06849900 |
| C | 0.52009300  | 2.05797700  | -0.79517700 |
| C | -2.59858600 | -1.44249400 | -1.95042100 |
| H | -5.33905800 | 0.45745200  | 0.79123300  |
| H | -3.90452800 | 0.02389900  | 1.72067500  |
| H | -2.53834800 | 3.57239900  | 1.84524800  |
| H | -2.19481300 | 1.91786400  | 2.35204300  |



|   |             |             |             |
|---|-------------|-------------|-------------|
| H | -4.64919600 | 2.36733800  | 2.18114100  |
| H | 2.34910600  | 0.37371400  | -1.80523900 |
| H | 1.75534800  | -1.56146900 | -3.31019600 |
| H | 1.37293500  | -1.89802300 | -1.61377900 |
| H | -0.52443700 | -2.59961500 | -3.01087900 |
| H | 1.57147400  | 2.28351200  | -0.63237200 |
| H | 0.16372800  | 2.58759600  | -1.67888100 |
| H | -2.67451600 | -2.51503400 | -2.13796400 |
| H | -3.00442700 | -0.91276700 | -2.82833500 |
| C | 2.93748800  | -1.42412800 | 1.04751900  |
| N | 1.68469200  | -1.27673500 | 1.18265700  |
| H | -1.48915600 | 0.01245800  | 0.77915400  |
| H | 0.60685000  | 0.06773700  | -0.20115400 |
| C | 0.90215300  | -2.24577700 | 1.97509500  |
| N | -1.19432900 | -1.10782500 | -1.72287300 |
| C | 1.72664900  | -3.33790900 | 2.65902100  |
| H | 2.47733200  | -2.92002400 | 3.33427900  |
| H | 1.05175100  | -3.95682400 | 3.25150200  |
| H | 2.22159200  | -3.99169100 | 1.93630200  |
| C | -0.11925000 | -2.88864600 | 1.03498500  |
| H | -0.77707600 | -3.54745800 | 1.60554600  |
| H | -0.73040800 | -2.13911400 | 0.53672800  |
| H | 0.39246400  | -3.48847200 | 0.27617600  |
| C | 0.18557000  | -1.40274700 | 3.03659500  |
| H | 0.90997600  | -0.98128000 | 3.73741500  |
| H | -0.35830200 | -0.58729800 | 2.56126200  |
| H | -0.51768300 | -2.02627500 | 3.59189000  |
| C | 3.75564300  | -0.39209900 | 0.37248000  |
| C | 3.47869800  | 0.96096000  | 0.58828700  |
| C | 4.81307100  | -0.75821000 | -0.46235900 |
| C | 4.24094400  | 1.93569300  | -0.04848000 |
| H | 2.66576200  | 1.22925900  | 1.25328600  |
| C | 5.55921800  | 0.21829100  | -1.11455800 |
| H | 5.03992100  | -1.80803500 | -0.61079300 |
| C | 5.27326600  | 1.56594000  | -0.90878500 |
| H | 4.03475400  | 2.98385100  | 0.13283600  |
| H | 6.36743400  | -0.07022700 | -1.77459200 |
| H | 5.86352700  | 2.32625000  | -1.40455200 |
| H | 3.48028400  | -2.29177600 | 1.43002500  |
| H | -4.46110000 | 2.76533600  | 0.48201800  |
| H | -3.90430100 | 0.88353400  | -1.20773900 |
| H | -2.09503100 | 2.92007300  | -0.53200100 |
| H | -1.22837300 | 0.91932500  | -2.33439500 |
| H | -0.61560300 | -0.99475800 | -3.76458300 |
| H | 1.10926100  | 0.81319600  | -3.00648800 |
| F | 0.24030100  | 1.86265100  | 1.51517200  |
| F | 0.03443300  | 3.83819500  | 0.58703700  |
| F | -3.18159500 | -1.94324800 | 0.27418900  |

F -4.77907000 -1.52978600 -1.16550500

| cat4_im2ets               | Energy (E)                     | Energy(E)+ZPE | Enthalpy (H) | Gibbs free energy (G) |
|---------------------------|--------------------------------|---------------|--------------|-----------------------|
| IEFPCM (THF)              | -1524.997586                   | -1524.409834  | -1524.380083 | -1524.46669           |
| Imaginary Frequency (one) | $\nu = 737.3i \text{ cm}^{-1}$ |               |              |                       |

C 0.04681700 2.34675500 -0.01542000  
 C -3.66137000 -0.94641400 -0.57333500  
 C -1.44089000 2.27580400 -0.09805700  
 C -3.41889000 0.52231700 -0.41661200  
 B -1.82959200 0.70237700 -0.19572200  
 C -4.15294300 1.20137000 0.74074200  
 C -2.22364400 2.90045900 1.05716000  
 C -3.73367400 2.67866600 0.85111700  
 C -0.99116100 -0.05303700 -1.34976900  
 C 1.26629000 -0.55985100 -2.11138600  
 C 0.87984200 -2.03071500 -2.19320800  
 C -0.61666200 -2.16542500 -2.45306800  
 N 0.47228200 0.11056800 -1.05974600  
 C 0.74230800 1.56137000 -1.12008300  
 C -2.79041200 -1.59846200 -1.64275900  
 H -5.24036400 1.13970900 0.62725100  
 H -3.89241500 0.68173200 1.66766400  
 H -2.02224600 3.97236700 1.15827400  
 H -1.91389300 2.42119600 1.99127000  
 H -4.28252300 3.15193200 1.67021100  
 H 2.32942700 -0.43104900 -1.89824500  
 H 1.44782800 -2.51057600 -2.99295100  
 H 1.12639100 -2.53215000 -1.25347800  
 H -0.91057100 -3.21827800 -2.45085100  
 H 1.81422200 1.73290100 -1.06303100  
 H 0.38744300 1.95731900 -2.07893700  
 H -3.04377800 -2.66057100 -1.66723500  
 H -3.08889400 -1.15522500 -2.60855700  
 C 2.70768200 -1.17547900 1.16332600  
 N 1.43598300 -1.06461000 1.16484700  
 H -1.53168600 0.16892300 0.86082500  
 H 0.89807700 -0.45153700 0.24917300  
 C 0.61705000 -1.76337000 2.20918400  
 N -1.35419600 -1.46204400 -1.41638400  
 C 1.44533600 -2.71940300 3.06812700  
 H 2.21131000 -2.20915800 3.65684700  
 H 0.75840700 -3.19033900 3.77106500  
 H 1.90416300 -3.51539400 2.47607900  
 C -0.49306300 -2.54913300 1.51910300  
 H -1.14624600 -2.97243100 2.28385700  
 H -1.08853500 -1.92465200 0.86038100

|   |             |             |             |
|---|-------------|-------------|-------------|
| H | -0.06850500 | -3.37076700 | 0.93551400  |
| C | 0.05488400  | -0.65142500 | 3.10285000  |
| H | 0.86939300  | -0.12779000 | 3.60885800  |
| H | -0.52107400 | 0.06161000  | 2.51922100  |
| H | -0.59366800 | -1.10447200 | 3.85459000  |
| C | 3.63554000  | -0.35864800 | 0.36464500  |
| C | 3.55531600  | 1.03375100  | 0.42353700  |
| C | 4.66866400  | -0.97724300 | -0.34738600 |
| C | 4.48655700  | 1.80418800  | -0.26727800 |
| H | 2.76665500  | 1.49998300  | 1.00117100  |
| C | 5.57706400  | -0.20236000 | -1.05532900 |
| H | 4.74411900  | -2.05849500 | -0.36118300 |
| C | 5.48552000  | 1.18875100  | -1.01458500 |
| H | 4.42448200  | 2.88400800  | -0.22196700 |
| H | 6.36211600  | -0.67865400 | -1.62820600 |
| H | 6.20309600  | 1.79132300  | -1.55667700 |
| H | 3.17190200  | -1.89088100 | 1.83555900  |
| H | -4.03685100 | 3.19669900  | -0.06708200 |
| H | -3.73254000 | 0.97921700  | -1.36663700 |
| H | -1.70257600 | 2.79094500  | -1.03387500 |
| H | -0.84881000 | -1.75428500 | -3.45437400 |
| H | -1.13496700 | 0.40283400  | -2.36032900 |
| H | 1.05200300  | -0.07181700 | -3.07261700 |
| F | 0.51528300  | 1.86265800  | 1.20202100  |
| F | 0.55083300  | 3.63240800  | -0.08908200 |
| F | -3.46083500 | -1.61301300 | 0.61520900  |
| F | -4.96954500 | -1.23519200 | -0.92627100 |

| <b>cat4_im2f</b>    | <b>Energy (E)</b> | <b>Energy(E)+ZPE</b> | <b>Enthalpy (H)</b> | <b>Gibbs free energy (G)</b> |
|---------------------|-------------------|----------------------|---------------------|------------------------------|
| <b>IEFPCM (THF)</b> | -1525.003163      | -1524.411897         | -1524.381471        | -1524.470103                 |

|   |             |             |             |
|---|-------------|-------------|-------------|
| C | -0.07633000 | 2.45801800  | 0.23343200  |
| C | -3.48791700 | -1.03497000 | -0.78877900 |
| F | 0.45135700  | 1.82208200  | 1.36149500  |
| F | 0.31242600  | 3.77630500  | 0.38158700  |
| F | -4.76197400 | -1.37887700 | -1.21187100 |
| F | -3.25978500 | -1.83589500 | 0.31168800  |
| C | -1.55273800 | 2.27038200  | 0.14728400  |
| C | -3.37080700 | 0.41355100  | -0.43091300 |
| B | -1.79961800 | 0.70257100  | -0.18814600 |
| C | -4.15487100 | 0.85618700  | 0.80592300  |
| C | -2.37568100 | 2.64772400  | 1.37855800  |
| C | -3.86256200 | 2.33195800  | 1.13189200  |
| C | -0.90470200 | 0.19439600  | -1.43044500 |
| C | 1.36601000  | 0.01520600  | -2.24572400 |
| C | 1.14511600  | -1.47529700 | -2.47190300 |
| C | -0.33088200 | -1.75009700 | -2.73963700 |
| N | 0.52508600  | 0.46964100  | -1.13370400 |

|   |             |             |             |
|---|-------------|-------------|-------------|
| C | 0.65832100  | 1.92091400  | -0.98764100 |
| C | -2.54735100 | -1.47351300 | -1.90718400 |
| H | -5.23392400 | 0.71852300  | 0.67841200  |
| H | -3.84616200 | 0.23322900  | 1.65114100  |
| H | -2.26523900 | 3.70593000  | 1.63948800  |
| H | -2.02157000 | 2.06383900  | 2.23475000  |
| H | -4.44649500 | 2.63326000  | 2.00638600  |
| H | 2.41513100  | 0.22980200  | -2.02399700 |
| H | 1.75136300  | -1.81767900 | -3.31354500 |
| H | 1.45430400  | -2.02881000 | -1.58001700 |
| H | -0.50956700 | -2.82414100 | -2.84368100 |
| H | 1.71207300  | 2.18692100  | -0.90795100 |
| H | 0.25201100  | 2.44298400  | -1.86751200 |
| H | -2.70436100 | -2.54350900 | -2.06278100 |
| H | -2.87688200 | -0.94741500 | -2.82006200 |
| C | 2.66439200  | -1.33583900 | 1.15247000  |
| N | 1.39980500  | -1.17388000 | 1.26095800  |
| H | -1.43877000 | 0.04381000  | 0.78007600  |
| H | 0.93370400  | -0.45743900 | 0.64058100  |
| C | 0.52356900  | -1.98593200 | 2.16277300  |
| N | -1.13171400 | -1.23564000 | -1.63909600 |
| C | 1.34176300  | -2.97641900 | 2.98499000  |
| H | 2.08238100  | -2.48266600 | 3.61915100  |
| H | 0.64388600  | -3.49882300 | 3.63888800  |
| H | 1.82863000  | -3.73253800 | 2.36448200  |
| C | -0.47710300 | -2.73094300 | 1.28310600  |
| H | -1.23267900 | -3.19072400 | 1.92135100  |
| H | -0.97175700 | -2.06577400 | 0.57899400  |
| H | 0.03613800  | -3.51660800 | 0.72193600  |
| C | -0.15375100 | -0.98079700 | 3.10012400  |
| H | 0.59070600  | -0.48456600 | 3.72659500  |
| H | -0.70749100 | -0.23500900 | 2.53369500  |
| H | -0.84903000 | -1.52380200 | 3.74178700  |
| C | 3.56824300  | -0.45021700 | 0.42683300  |
| C | 3.40520000  | 0.93574600  | 0.49260600  |
| C | 4.65262800  | -1.00941000 | -0.25930300 |
| C | 4.31734000  | 1.75787400  | -0.15924500 |
| H | 2.57900900  | 1.35673900  | 1.05155800  |
| C | 5.53827100  | -0.18188200 | -0.93353500 |
| H | 4.78424700  | -2.08505300 | -0.28025600 |
| C | 5.37016800  | 1.20177600  | -0.88040900 |
| H | 4.20026600  | 2.83269200  | -0.10509200 |
| H | 6.36393500  | -0.60921100 | -1.48708000 |
| H | 6.07183400  | 1.84776000  | -1.39263100 |
| H | 3.10517600  | -2.18326200 | 1.66486000  |
| H | -4.21220000 | 2.95049900  | 0.29608100  |
| H | -3.72888000 | 0.96807400  | -1.31052500 |
| H | -1.87143200 | 2.89166500  | -0.70226300 |

|   |             |             |             |
|---|-------------|-------------|-------------|
| H | -1.13856700 | 0.73088800  | -2.38697300 |
| H | -0.61773600 | -1.26928400 | -3.69455400 |
| H | 1.09762900  | 0.56294800  | -3.16537300 |

| <b>cat4_im2gts</b>        | Energy (E)   | Energy(E)+ZPE                  | Enthalpy (H) | Gibbs free energy (G) |
|---------------------------|--------------|--------------------------------|--------------|-----------------------|
| <b>IEFPCM (THF)</b>       | -1524.989562 | -1524.402944                   | -1524.373425 | -1524.45819           |
| Imaginary Frequency (one) |              | $\nu = 153.1i \text{ cm}^{-1}$ |              |                       |

|   |             |             |             |
|---|-------------|-------------|-------------|
| C | 0.25421200  | -2.34612100 | -1.74894700 |
| C | 0.40803900  | -0.02817700 | 2.69141900  |
| C | -0.24508100 | -2.49870000 | -0.33771700 |
| C | -0.17493300 | -1.24931800 | 2.03622200  |
| B | 0.28179000  | -1.20954800 | 0.48770200  |
| C | -1.68048800 | -1.51375500 | 2.18033000  |
| C | -1.74801600 | -2.73421000 | -0.12388100 |
| C | -2.08640400 | -2.77566600 | 1.38431500  |
| C | 1.88261800  | -1.07542900 | 0.35887700  |
| C | 3.75141100  | -0.94271900 | -1.19358500 |
| C | 4.33584800  | 0.20857500  | -0.37323300 |
| C | 3.85568100  | 0.14648200  | 1.07802600  |
| N | 2.29197800  | -0.98636300 | -1.05964800 |
| C | 1.76852700  | -2.11619800 | -1.83749800 |
| C | 1.92890600  | 0.07297500  | 2.51119400  |
| H | -1.96778900 | -1.64237700 | 3.23279700  |
| H | -2.24827600 | -0.65562900 | 1.80621500  |
| H | -2.08085100 | -3.66898200 | -0.59507600 |
| H | -2.32073000 | -1.92870200 | -0.59497700 |
| H | -3.16272800 | -2.95095500 | 1.50802500  |
| H | 4.01198200  | -0.82794400 | -2.25340300 |
| H | 5.43066300  | 0.16205800  | -0.40371800 |
| H | 4.03410000  | 1.16406600  | -0.81434100 |
| H | 4.19420000  | 1.03282000  | 1.62986800  |
| H | 2.02006500  | -1.96525900 | -2.89304300 |
| H | 2.23444300  | -3.07119500 | -1.52754700 |
| H | 2.26161800  | 0.99596800  | 2.99947700  |
| H | 2.35996900  | -0.76953400 | 3.08471800  |
| N | 2.39389900  | 0.08189800  | 1.12071700  |
| H | -0.25943900 | -0.18628600 | -0.07048300 |
| H | -1.58415800 | -3.64660500 | 1.83142200  |
| H | 0.29238000  | -3.38062300 | 0.04964100  |
| H | 0.35659500  | -2.09271600 | 2.50839500  |
| H | 2.35316900  | -2.00276000 | 0.79151700  |
| H | 4.20515100  | -1.89655400 | -0.85230900 |
| H | 4.30625800  | -0.73646000 | 1.57696900  |
| C | -0.97917800 | 1.32622400  | -0.92717300 |
| N | -0.41329000 | 2.44128900  | -0.52867000 |

|   |             |             |             |
|---|-------------|-------------|-------------|
| C | 0.83262000  | 3.09850300  | -1.01599400 |
| C | 0.40388300  | 4.47900900  | -1.55139500 |
| H | -0.08367300 | 5.07674100  | -0.77277800 |
| H | 1.28513800  | 5.03175100  | -1.88934000 |
| H | -0.28640900 | 4.38121500  | -2.39478500 |
| C | 1.47481600  | 2.26397300  | -2.12637900 |
| H | 2.40593100  | 2.75101100  | -2.42960300 |
| H | 1.70927600  | 1.24652000  | -1.79295900 |
| H | 0.83176400  | 2.21518600  | -3.01231900 |
| C | 1.77154800  | 3.25410700  | 0.18956500  |
| H | 1.29763000  | 3.84909200  | 0.97926100  |
| H | 2.02571600  | 2.26783900  | 0.58763500  |
| H | 2.68229300  | 3.77705400  | -0.11873500 |
| C | -2.39078800 | 1.06090900  | -0.60932100 |
| C | -3.15580700 | 0.38188900  | -1.56992400 |
| C | -3.00924200 | 1.54138100  | 0.55650200  |
| C | -4.52821500 | 0.22268400  | -1.38587400 |
| H | -2.66602800 | -0.02990700 | -2.44618800 |
| C | -4.37801500 | 1.37094400  | 0.73830000  |
| H | -2.41209300 | 1.98250600  | 1.34894000  |
| C | -5.14187400 | 0.72179100  | -0.23646700 |
| H | -5.11445100 | -0.29909500 | -2.13567500 |
| H | -4.84836100 | 1.73052400  | 1.64809600  |
| H | -6.20995800 | 0.59233900  | -0.09047100 |
| H | -0.54424400 | 0.81316800  | -1.77386500 |
| H | -0.86817900 | 2.93691000  | 0.23038400  |
| F | -0.18237400 | 1.14512900  | 2.20103400  |
| F | 0.17166000  | 0.02283900  | 4.05908900  |
| F | -0.40001000 | -1.29252600 | -2.41008800 |
| F | -0.01799300 | -3.45101300 | -2.54350400 |

| <b>cat4_am2</b>     | <b>Energy (E)</b> | <b>Energy(E)+ZPE</b> | <b>Enthalpy (H)</b> | <b>Gibbs free energy (G)</b> |
|---------------------|-------------------|----------------------|---------------------|------------------------------|
| <b>IEFPCM (THF)</b> | -1525.02879       | -1524.436889         | -1524.405711        | -1524.497604                 |

|   |             |             |             |
|---|-------------|-------------|-------------|
| C | -1.82663200 | -1.97652600 | -1.48443300 |
| C | 1.03236700  | -0.92076800 | 2.52717700  |
| C | -1.87625300 | -1.96638100 | 0.02362900  |
| C | -0.34233700 | -1.43898400 | 2.17626600  |
| B | -0.45594600 | -1.78432900 | 0.65413500  |
| C | -1.50568800 | -0.58914500 | 2.71056600  |
| C | -2.92887100 | -1.03252700 | 0.64068600  |
| C | -2.85656100 | -1.07620300 | 2.17189200  |
| C | 0.83847300  | -2.16316000 | -0.16929700 |
| C | 1.78885100  | -2.36788300 | -2.36787400 |
| C | 3.01596400  | -1.60470100 | -1.89244500 |
| C | 3.21055700  | -1.81255900 | -0.39701500 |
| N | 0.62628700  | -1.94034200 | -1.59763700 |

|   |             |             |             |
|---|-------------|-------------|-------------|
| C | -0.57561300 | -2.61794300 | -2.05416700 |
| C | 2.16162000  | -1.57415200 | 1.74961900  |
| H | -1.50130500 | -0.59837000 | 3.80279100  |
| H | -1.35423500 | 0.44230200  | 2.39145000  |
| H | -3.92495200 | -1.31867200 | 0.29608500  |
| H | -2.74746500 | -0.01132500 | 0.29768700  |
| H | -3.64833100 | -0.44701400 | 2.58402100  |
| H | 1.59949800  | -2.17029000 | -3.42463300 |
| H | 3.90213600  | -1.93868100 | -2.43504700 |
| H | 2.86383900  | -0.54163900 | -2.08866800 |
| H | 4.04446600  | -1.20993300 | -0.02997400 |
| H | -0.63836700 | -2.53830000 | -3.14034500 |
| H | -0.58593300 | -3.68932100 | -1.78879900 |
| H | 3.08756900  | -1.08664600 | 2.05873200  |
| H | 2.21578900  | -2.63434800 | 2.05010300  |
| C | 0.19232700  | 1.71745300  | -1.36315200 |
| N | 1.27532300  | 1.68776300  | -0.40262000 |
| H | 1.64082500  | 0.75214700  | -0.27370300 |
| C | 2.33966100  | 2.68553300  | -0.47824200 |
| N | 1.99878900  | -1.41210400 | 0.31331600  |
| C | 3.26872100  | 2.40972200  | 0.70495300  |
| H | 3.70012300  | 1.40718400  | 0.61843200  |
| H | 4.08796400  | 3.13118400  | 0.73403700  |
| H | 2.70803600  | 2.45554600  | 1.63878100  |
| C | 3.15308400  | 2.60679200  | -1.78212300 |
| H | 3.64486000  | 1.63392500  | -1.86255300 |
| H | 2.51460600  | 2.74286400  | -2.65766500 |
| H | 3.92536400  | 3.37987800  | -1.80921400 |
| C | 1.74025100  | 4.08633300  | -0.33569100 |
| H | 1.03949900  | 4.30377000  | -1.14479500 |
| H | 1.20308700  | 4.17183500  | 0.60950600  |
| H | 2.53162200  | 4.83884400  | -0.36315100 |
| C | -1.13236000 | 2.18150500  | -0.77109400 |
| C | -1.26630400 | 2.44979000  | 0.58910400  |
| C | -2.25580100 | 2.29918500  | -1.59312000 |
| C | -2.49979300 | 2.82803200  | 1.11975500  |
| H | -0.38881900 | 2.33869600  | 1.21401400  |
| C | -3.48687300 | 2.67192300  | -1.06730900 |
| H | -2.16568600 | 2.07524200  | -2.65090500 |
| C | -3.61426300 | 2.93881500  | 0.29545700  |
| H | -2.58752000 | 3.03409700  | 2.18050600  |
| H | -4.34929000 | 2.75149900  | -1.71815500 |
| H | -4.57305700 | 3.23037400  | 0.70634900  |
| H | 0.42272600  | 2.35096300  | -2.22907600 |
| H | 0.03926300  | 0.70890500  | -1.75751300 |
| H | -3.04850100 | -2.09830700 | 2.52071700  |
| H | -2.12296300 | -3.00538800 | 0.30613700  |
| H | -0.39536300 | -2.44195400 | 2.63653400  |

|   |             |             |             |
|---|-------------|-------------|-------------|
| H | 1.95600200  | -3.45461800 | -2.24893000 |
| H | 1.02269200  | -3.26230600 | 0.00546200  |
| H | 3.44396500  | -2.87402100 | -0.19567000 |
| F | 1.08727100  | 0.42983100  | 2.32051700  |
| F | 1.29087900  | -1.11204000 | 3.86426000  |
| F | -1.91609100 | -0.69823600 | -1.96614100 |
| F | -2.91010000 | -2.64828900 | -1.99791000 |

| cat4_im1d    | Energy (E)   | Energy(E)+ZPE | Enthalpy (H) | Gibbs free energy (G) |
|--------------|--------------|---------------|--------------|-----------------------|
| IEFPCM (THF) | -1254.608046 | -1254.12795   | -1254.102628 | -1254.180293          |

|   |             |             |             |
|---|-------------|-------------|-------------|
| C | 0.95306200  | 1.95234300  | -1.11827100 |
| C | -2.79670500 | -0.83754400 | 0.62896800  |
| C | -0.51211300 | 2.03074100  | -0.83838400 |
| C | -2.51980200 | 0.54239300  | 0.11710200  |
| B | -0.94198500 | 0.59753200  | -0.21298600 |
| C | -2.86468000 | 1.69005200  | 1.06637500  |
| C | -0.92861900 | 3.12998300  | 0.14271800  |
| C | -2.43272000 | 3.03333600  | 0.45278300  |
| C | -0.53213600 | -0.62519700 | -1.19237900 |
| C | 1.51098100  | -1.69878600 | -2.14180700 |
| C | 1.02783700  | -3.02015900 | -1.56142900 |
| C | -0.49223700 | -3.02647100 | -1.43440700 |
| N | 0.97016000  | -0.56775000 | -1.34059200 |
| C | 1.36331700  | 0.73329500  | -1.94563600 |
| C | -2.32767500 | -1.93986400 | -0.31635200 |
| H | -3.93443400 | 1.71936700  | 1.29646200  |
| H | -2.33150500 | 1.53375800  | 2.00876200  |
| H | -0.69602000 | 4.12816200  | -0.24255500 |
| H | -0.36430000 | 2.99711600  | 1.07024900  |
| H | -2.71325000 | 3.84830800  | 1.12562100  |
| H | 2.60032200  | -1.62839800 | -2.13535200 |
| H | 1.36573000  | -3.83189900 | -2.20808600 |
| H | 1.46899400  | -3.15791000 | -0.57241200 |
| H | -0.82062800 | -3.95390400 | -0.96071700 |
| H | 2.44627900  | 0.74646500  | -2.07015700 |
| H | 0.88709400  | 0.80193100  | -2.92474800 |
| H | -2.56271100 | -2.89662700 | 0.15358300  |
| H | -2.93068100 | -1.85358300 | -1.23528500 |
| C | 3.10666200  | -0.37345900 | 1.63625200  |
| N | 2.09860400  | -1.01635300 | 1.19849600  |
| H | -0.30588000 | 0.43146400  | 0.81748800  |
| H | 1.38487800  | -0.65568500 | -0.36105900 |
| N | -0.89603500 | -1.90164900 | -0.60620500 |
| H | -2.99301400 | 3.19013000  | -0.47722500 |
| H | -3.11502300 | 0.64377400  | -0.80248000 |
| H | -0.99479100 | 2.20345500  | -1.81122600 |
| H | -0.91112500 | -0.54660600 | -2.23428600 |



|   |             |             |             |
|---|-------------|-------------|-------------|
| H | -0.95628900 | -2.97777700 | -2.43711500 |
| H | 1.15135900  | -1.56486200 | -3.16581800 |
| F | 1.69495800  | 1.92420200  | 0.04249400  |
| F | 1.44194000  | 3.03111700  | -1.82973800 |
| F | -2.21285900 | -1.04191600 | 1.85659000  |
| F | -4.14705800 | -1.06732400 | 0.82924900  |
| C | 1.12677400  | -1.54380700 | 2.15656300  |
| H | 0.25725500  | -1.89769100 | 1.60829300  |
| H | 1.56814600  | -2.36865300 | 2.72554900  |
| H | 0.78801100  | -0.77604700 | 2.85518200  |
| C | 4.10582400  | 0.18751800  | 0.66511200  |
| H | 4.08148700  | 1.27829700  | 0.69949200  |
| H | 5.11382500  | -0.13730700 | 0.93201100  |
| H | 3.88121900  | -0.14167800 | -0.34799700 |
| C | 3.36266300  | -0.10616300 | 3.09856900  |
| H | 2.59480800  | 0.56897600  | 3.48477800  |
| H | 3.30855200  | -1.02827100 | 3.67978100  |
| H | 4.33710600  | 0.35431800  | 3.25029100  |

| <b>cat4_imlets</b>        | Energy (E)   | Energy(E)+ZPE                   | Enthalpy (H) | Gibbs free energy (G) |
|---------------------------|--------------|---------------------------------|--------------|-----------------------|
| <b>IEFPCM (THF)</b>       | -1254.603542 | -1254.12762                     | -1254.102958 | -1254.178493          |
| Imaginary Frequency (one) |              | $\nu = 1091.1i \text{ cm}^{-1}$ |              |                       |

|   |             |             |             |
|---|-------------|-------------|-------------|
| C | 0.93941900  | 2.00933900  | -1.01333600 |
| C | -2.78127400 | -0.92601500 | 0.53109900  |
| C | -0.53376600 | 2.04297400  | -0.77250400 |
| C | -2.52552100 | 0.47340000  | 0.06667400  |
| B | -0.93555800 | 0.58436000  | -0.18979400 |
| C | -2.94967700 | 1.58827600  | 1.02275500  |
| C | -1.02220400 | 3.10998000  | 0.20932000  |
| C | -2.53392500 | 2.95807000  | 0.45734300  |
| C | -0.42791700 | -0.60280500 | -1.16661500 |
| C | 1.62825500  | -1.56810200 | -2.10696900 |
| C | 1.19268500  | -2.92998900 | -1.58023600 |
| C | -0.32689000 | -2.99489100 | -1.47039100 |
| N | 1.06189200  | -0.49483300 | -1.26612100 |
| C | 1.39436800  | 0.81937400  | -1.85418500 |
| C | -2.23124600 | -1.98869900 | -0.41494700 |
| H | -4.02911000 | 1.58069000  | 1.20597000  |
| H | -2.45404300 | 1.42870500  | 1.98511900  |
| H | -0.81011600 | 4.12302400  | -0.14878700 |
| H | -0.48918900 | 2.97939400  | 1.15586400  |
| H | -2.86893200 | 3.74872700  | 1.13456900  |
| H | 2.71831500  | -1.47501900 | -2.11266600 |
| H | 1.56174600  | -3.70932100 | -2.24969000 |
| H | 1.62774700  | -3.09867500 | -0.59189700 |
| H | -0.63227600 | -3.94771000 | -1.03117500 |

|   |             |             |             |
|---|-------------|-------------|-------------|
| H | 2.47454600  | 0.89223100  | -1.99375000 |
| H | 0.91799700  | 0.90444200  | -2.83700600 |
| H | -2.47111800 | -2.96465500 | 0.01241800  |
| H | -2.78181500 | -1.88853600 | -1.36515300 |
| C | 3.02268000  | -0.35795400 | 1.59589100  |
| N | 1.91487400  | -0.83851600 | 1.18279000  |
| H | -0.35479900 | 0.44453500  | 0.87743200  |
| H | 1.52403100  | -0.64840600 | -0.00255100 |
| N | -0.78739400 | -1.90724400 | -0.62102700 |
| H | -3.05999900 | 3.11753700  | -0.49197500 |
| H | -3.07864200 | 0.57765000  | -0.87841300 |
| H | -0.99158300 | 2.21280500  | -1.75781600 |
| H | -0.77539500 | -2.93085500 | -2.47912800 |
| H | -0.80717100 | -0.52107000 | -2.21257500 |
| H | 1.27004500  | -1.43185400 | -3.13596900 |
| F | 1.64934100  | 1.97346600  | 0.17455500  |
| F | 1.41926300  | 3.12600500  | -1.67237500 |
| F | -2.24618900 | -1.14381700 | 1.78283800  |
| F | -4.13039500 | -1.20453100 | 0.66777800  |
| C | 3.98602200  | 0.26277100  | 0.63348900  |
| H | 4.98634700  | -0.13483100 | 0.81436600  |
| H | 3.69974300  | 0.07350500  | -0.39679900 |
| H | 4.01118400  | 1.34132900  | 0.79713200  |
| C | 0.96674500  | -1.46010700 | 2.11001400  |
| H | 0.57121100  | -0.71604600 | 2.80160000  |
| H | 0.13771200  | -1.84810700 | 1.52554200  |
| H | 1.46024500  | -2.25868000 | 2.66872000  |
| C | 3.41175200  | -0.38038200 | 3.04641100  |
| H | 2.62019900  | 0.05787500  | 3.65623000  |
| H | 3.55495700  | -1.40958600 | 3.38469500  |
| H | 4.33513100  | 0.17169900  | 3.20711600  |

| <b>cat4_im1f</b>    | <b>Energy (E)</b> | <b>Energy(E)+ZPE</b> | <b>Enthalpy (H)</b> | <b>Gibbs free energy (G)</b> |
|---------------------|-------------------|----------------------|---------------------|------------------------------|
| <b>IEFPCM (THF)</b> | -1254.606215      | -1254.126981         | -1254.10192         | -1254.179185                 |

|   |             |             |             |
|---|-------------|-------------|-------------|
| C | 0.82838500  | 2.16723900  | -0.89082900 |
| C | -2.68252100 | -1.09658900 | 0.46174000  |
| F | 1.54008600  | 2.08491900  | 0.29714300  |
| F | 1.23509500  | 3.36409600  | -1.45269500 |
| F | -4.00975200 | -1.48013700 | 0.54367200  |
| F | -2.17757700 | -1.33970500 | 1.72750200  |
| C | -0.64199000 | 2.09074100  | -0.64708100 |
| C | -2.51599300 | 0.33985400  | 0.08236700  |
| B | -0.93522100 | 0.57468800  | -0.15648000 |
| C | -3.02563900 | 1.36595400  | 1.09491500  |
| C | -1.20324900 | 3.06214300  | 0.39239300  |
| C | -2.70235600 | 2.79273400  | 0.61658800  |
| C | -0.35190600 | -0.50705800 | -1.20857000 |

|   |             |             |             |
|---|-------------|-------------|-------------|
| C | 1.69594000  | -1.24244400 | -2.30275900 |
| C | 1.40197800  | -2.67054400 | -1.85934400 |
| C | -0.09738100 | -2.86328600 | -1.65936000 |
| N | 1.11143800  | -0.29166100 | -1.34907300 |
| C | 1.34637000  | 1.07845400  | -1.82577000 |
| C | -2.03110500 | -2.07038400 | -0.51482500 |
| H | -4.10346400 | 1.27283200  | 1.26477700  |
| H | -2.52832200 | 1.18655100  | 2.05297000  |
| H | -1.05962100 | 4.10698900  | 0.09694900  |
| H | -0.66657500 | 2.91183800  | 1.33419100  |
| H | -3.09573200 | 3.51526600  | 1.33726500  |
| H | 2.77461600  | -1.06748000 | -2.37050200 |
| H | 1.77630000  | -3.37128300 | -2.60837900 |
| H | 1.92245500  | -2.87795100 | -0.91979400 |
| H | -0.30311100 | -3.86341100 | -1.26747400 |
| H | 2.41842900  | 1.23709400  | -1.96787900 |
| H | 0.85648800  | 1.22964200  | -2.79781400 |
| H | -2.19430300 | -3.07920400 | -0.12838700 |
| H | -2.58779500 | -1.97848900 | -1.46280600 |
| C | 2.95134800  | -0.40338000 | 1.66913500  |
| N | 1.86968700  | -0.92240300 | 1.22747200  |
| H | -0.34728300 | 0.42254600  | 0.90994000  |
| H | 1.56354600  | -0.66576700 | 0.20671300  |
| N | -0.59822100 | -1.86659700 | -0.72159000 |
| H | -3.23273600 | 2.97320200  | -0.32654400 |
| H | -3.06374700 | 0.46021300  | -0.86383800 |
| H | -1.11548300 | 2.28257300  | -1.62077000 |
| H | -0.79501900 | -0.40138400 | -2.23040700 |
| H | -0.60891500 | -2.77603700 | -2.63599800 |
| H | 1.26592400  | -1.07208000 | -3.30235100 |
| C | 0.96496700  | -1.77568600 | 1.99281100  |
| H | 0.88256200  | -2.72701900 | 1.47098400  |
| H | 1.33647200  | -1.92583500 | 3.00212700  |
| H | -0.01975900 | -1.31617400 | 1.99032700  |
| C | 3.81714000  | 0.40214000  | 0.75750300  |
| H | 4.84785700  | 0.05692800  | 0.85777700  |
| H | 3.49236700  | 0.32311600  | -0.27490400 |
| H | 3.77280800  | 1.45024000  | 1.05711000  |
| C | 3.40534800  | -0.57386800 | 3.09015600  |
| H | 2.62422500  | -0.25732800 | 3.78198700  |
| H | 3.64007200  | -1.62004700 | 3.29620000  |
| H | 4.29685200  | 0.02296700  | 3.26826200  |

| cat4_im1gts               | Energy (E)   | Energy(E)+ZPE                  | Enthalpy (H) | Gibbs free energy (G) |
|---------------------------|--------------|--------------------------------|--------------|-----------------------|
| IEFPCM (THF)              | -1254.591058 | -1254.111708                   | -1254.087584 | -1254.160535          |
| Imaginary Frequency (one) |              | $\nu = 114.9i \text{ cm}^{-1}$ |              |                       |

|   |             |             |             |
|---|-------------|-------------|-------------|
| C | -2.01016900 | 0.96887500  | -1.23473400 |
| C | 2.22246700  | -1.55583200 | -0.29737700 |
| C | -1.27059700 | -0.28405400 | -1.57756400 |
| C | 0.95425800  | -1.62078900 | -1.08517500 |
| B | 0.04385100  | -0.36612400 | -0.64700100 |
| C | 0.13861400  | -2.91125900 | -1.01796300 |
| C | -2.04351300 | -1.60146200 | -1.51221200 |
| C | -1.12360900 | -2.77789100 | -1.89168800 |
| C | 0.87056400  | 1.01161200  | -0.70615000 |
| C | 0.72661200  | 3.38928600  | -0.30136600 |
| C | 2.00015200  | 3.30510700  | 0.53047500  |
| C | 2.86147600  | 2.14529600  | 0.04697700  |
| N | 0.00481700  | 2.11839000  | -0.25960600 |
| C | -1.13373700 | 2.21221300  | -1.17229900 |
| C | 2.90959700  | -0.19827400 | -0.37292500 |
| H | 0.71892300  | -3.77943900 | -1.34564800 |
| H | -0.15904800 | -3.09733100 | 0.01929100  |
| H | -2.92323400 | -1.59785300 | -2.16349100 |
| H | -2.40074000 | -1.75655500 | -0.48816900 |
| H | -1.69368500 | -3.71026600 | -1.85329400 |
| H | 0.07272600  | 4.18530500  | 0.06669800  |
| H | 2.55482000  | 4.24236500  | 0.44800800  |
| H | 1.74630100  | 3.15362300  | 1.58211900  |
| H | 3.75294200  | 2.04012200  | 0.67174200  |
| H | -1.77159200 | 3.04561400  | -0.86787100 |
| H | -0.79987100 | 2.40692500  | -2.20607600 |
| H | 3.81617800  | -0.25620900 | 0.23411600  |
| H | 3.21728300  | -0.06053700 | -1.42467700 |
| N | 2.09131300  | 0.91091500  | 0.09975100  |
| N | -1.93783800 | 0.16461100  | 2.39085300  |
| C | -0.76495600 | -0.41218500 | 2.42193300  |
| H | -0.33822500 | -0.55688200 | 0.56336400  |
| H | -0.80926800 | -2.64789700 | -2.93387300 |
| H | -0.92817600 | -0.13111000 | -2.61178400 |
| H | 1.26513700  | -1.45917500 | -2.12811400 |
| H | 1.17795100  | 1.23298000  | -1.76615400 |
| H | 1.00018700  | 3.63866600  | -1.34377800 |
| H | 3.19913100  | 2.35200000  | -0.98681100 |
| H | -1.93663200 | 1.13719900  | 2.11514200  |
| C | -0.67598200 | -1.88136000 | 2.68038000  |
| H | 0.29791500  | -2.23613500 | 2.35942900  |
| H | -0.78457400 | -2.04347800 | 3.75857400  |
| H | -1.45361900 | -2.43532700 | 2.15926700  |

|   |             |             |             |
|---|-------------|-------------|-------------|
| C | -3.21279700 | -0.53434900 | 2.30081400  |
| H | -3.32892500 | -1.20498900 | 3.15040900  |
| H | -4.00457500 | 0.20871100  | 2.31908300  |
| H | -3.27894100 | -1.08732600 | 1.36534700  |
| C | 0.42263300  | 0.44985000  | 2.68016100  |
| H | 0.50030800  | 0.57496900  | 3.76615200  |
| H | 1.31974700  | -0.01439200 | 2.28557900  |
| H | 0.30238000  | 1.41370700  | 2.18838700  |
| F | 1.99746100  | -1.85475300 | 1.04144600  |
| F | 3.14948900  | -2.49291000 | -0.70628200 |
| F | -2.66509200 | 0.84130200  | -0.01377200 |
| F | -3.02454900 | 1.24938500  | -2.12835700 |

| <b>cat4_am1</b>     | <b>Energy (E)</b> | <b>Energy(E)+ZPE</b> | <b>Enthalpy (H)</b> | <b>Gibbs free energy (G)</b> |
|---------------------|-------------------|----------------------|---------------------|------------------------------|
| <b>IEFPCM (THF)</b> | -1254.61747       | -1254.136318         | -1254.110577        | -1254.191312                 |

|   |             |             |             |
|---|-------------|-------------|-------------|
| C | -0.02593200 | 2.62932400  | -0.32875600 |
| C | -1.90483300 | -1.98396900 | -0.20720700 |
| C | -1.36713400 | 1.95121500  | -0.20413000 |
| C | -2.38177200 | -0.55341400 | -0.13834300 |
| B | -1.25895700 | 0.43726300  | -0.59628800 |
| C | -3.05149200 | -0.16008500 | 1.18688200  |
| C | -2.09641200 | 2.19838200  | 1.12456100  |
| C | -3.36286200 | 1.34049700  | 1.22504800  |
| C | -0.14114600 | -0.04444200 | -1.60456200 |
| C | 2.06364200  | 0.38823000  | -2.48053500 |
| C | 2.41164000  | -1.08307400 | -2.29789600 |
| C | 1.14676900  | -1.92617500 | -2.37195900 |
| N | 1.06362900  | 0.77513000  | -1.48939900 |
| C | 0.76587000  | 2.19382700  | -1.54694600 |
| C | -1.01662200 | -2.27587400 | -1.40097500 |
| H | -3.96078300 | -0.74664800 | 1.33296500  |
| H | -2.37354500 | -0.40707500 | 2.00742100  |
| H | -2.33900000 | 3.25829300  | 1.22358500  |
| H | -1.42479500 | 1.94575800  | 1.94862600  |
| H | -3.88614900 | 1.57716600  | 2.15356400  |
| H | 2.95010700  | 1.00975900  | -2.33732600 |
| H | 3.11147400  | -1.39740600 | -3.07479600 |
| H | 2.87837600  | -1.21292500 | -1.31933600 |
| H | 1.37361000  | -2.97259400 | -2.15891200 |
| H | 1.70282100  | 2.75277700  | -1.54356600 |
| H | 0.19992000  | 2.48118200  | -2.44957900 |
| H | -0.72541500 | -3.32523800 | -1.33687100 |
| H | -1.61812400 | -2.14420600 | -2.31788100 |
| C | 1.87869200  | -1.23491300 | 1.84020700  |
| N | 2.68801600  | -0.30095100 | 1.05175400  |
| H | 2.07342500  | 0.12511200  | 0.36384900  |

|   |             |             |             |
|---|-------------|-------------|-------------|
| N | 0.17872500  | -1.45339800 | -1.38699500 |
| H | 1.40915000  | -1.89486100 | 1.10636700  |
| H | -4.04511200 | 1.59519600  | 0.40514200  |
| H | -1.98008700 | 2.36642800  | -1.02303000 |
| H | -3.12406000 | -0.45995800 | -0.95025200 |
| H | 1.68200900  | 0.56527300  | -3.50295200 |
| H | -0.57017400 | 0.08102200  | -2.64132500 |
| H | 0.71746400  | -1.87174700 | -3.39043300 |
| C | 3.33839900  | 0.76064900  | 1.80783800  |
| H | 3.83998500  | 1.42789500  | 1.10440700  |
| H | 2.66088300  | 1.37278300  | 2.41702200  |
| H | 4.10569900  | 0.34402600  | 2.46339400  |
| C | 2.76042100  | -2.08180300 | 2.75421800  |
| H | 2.17537600  | -2.88049500 | 3.21409800  |
| H | 3.57713600  | -2.52346400 | 2.18196700  |
| H | 3.18839000  | -1.48123100 | 3.56047100  |
| C | 0.74890900  | -0.56760300 | 2.63574000  |
| H | 0.18320200  | 0.10470600  | 1.98454800  |
| H | 0.06486600  | -1.31712000 | 3.03700800  |
| H | 1.13724200  | 0.02116200  | 3.47006500  |
| F | 0.72226100  | 2.36735800  | 0.79137000  |
| F | -0.17447000 | 3.99221600  | -0.37758700 |
| F | -2.97457400 | -2.84451900 | -0.25300400 |
| F | -1.21749700 | -2.29616500 | 0.93550600  |

| <b>cat3_Dimer1</b>  | <b>Energy (E)</b> | <b>Energy(E)+ZPE</b> | <b>Enthalpy (H)</b> | <b>Gibbs free energy (G)</b> |
|---------------------|-------------------|----------------------|---------------------|------------------------------|
| <b>IEFPCM (THF)</b> | -1287.382167      | -1286.661941         | -1286.63263         | -1286.71937                  |

|   |             |             |             |
|---|-------------|-------------|-------------|
| C | 3.11184400  | 2.19202100  | 0.93049900  |
| C | 2.52804900  | -2.64703200 | -0.39564000 |
| C | 3.96258800  | 0.97105100  | 0.57109500  |
| C | 3.64850800  | -1.63588900 | -0.14073600 |
| B | 3.13329000  | -0.35909900 | 0.60874600  |
| C | 4.48446700  | -1.30180200 | -1.38382500 |
| C | 4.76713600  | 1.12900400  | -0.72610000 |
| C | 5.48046700  | -0.16780800 | -1.12075200 |
| C | 1.86513800  | -0.46395400 | 1.55127900  |
| C | 0.13198200  | 0.73121200  | 2.69172400  |
| C | -0.87606000 | -0.32370500 | 2.26265200  |
| C | -0.17691700 | -1.65107200 | 2.01302600  |
| N | 1.19959800  | 0.83086800  | 1.70355300  |
| C | 2.14764600  | 1.87905700  | 2.06951000  |
| C | 1.58646900  | -2.74345200 | 0.80074400  |
| H | 5.00788200  | -2.19394400 | -1.74212700 |
| H | 3.80755600  | -0.99359400 | -2.18989700 |
| H | 5.48744600  | 1.94774200  | -0.63099600 |
| H | 4.08038400  | 1.41113700  | -1.53394200 |

|   |             |             |             |
|---|-------------|-------------|-------------|
| H | 6.09180000  | 0.00164000  | -2.01055200 |
| H | -0.35103300 | 1.70713800  | 2.78573900  |
| H | -1.64007400 | -0.44682200 | 3.03395800  |
| H | -1.38865100 | -0.01018100 | 1.35214000  |
| H | -0.88846800 | -2.36211600 | 1.58618100  |
| H | 1.56788500  | 2.77183100  | 2.31568100  |
| H | 2.71564600  | 1.60201500  | 2.97816900  |
| H | 0.80583700  | -3.48020600 | 0.59502700  |
| H | 2.14093800  | -3.10107900 | 1.68953000  |
| N | 0.92280300  | -1.47256800 | 1.07140000  |
| H | 2.52262600  | 2.49167000  | 0.05888200  |
| H | 3.74213800  | 3.04406800  | 1.20375700  |
| H | 2.93623900  | -3.63644400 | -0.62511500 |
| H | 1.94304100  | -2.32792700 | -1.26352900 |
| H | 0.55028700  | 0.46699100  | 3.68222200  |
| H | 0.19867000  | -2.06391700 | 2.96880200  |
| H | 2.25706000  | -0.78475400 | 2.56133400  |
| H | 4.68488500  | 0.81340500  | 1.39457000  |
| H | 6.16512000  | -0.46487800 | -0.31722400 |
| H | 4.33074200  | -2.07651000 | 0.61141800  |
| C | -0.94220300 | -1.60259800 | -1.88894800 |
| C | -2.50840600 | 2.78025400  | 0.08625400  |
| C | -0.86867900 | -0.10008700 | -2.17517200 |
| C | -1.71525100 | 2.25851400  | -1.11518800 |
| B | -1.89505600 | 0.71281300  | -1.31373500 |
| C | -0.24122800 | 2.68441500  | -1.11844600 |
| C | 0.55062200  | 0.48175700  | -2.08365200 |
| C | 0.55085400  | 2.00597500  | -2.24160100 |
| C | -3.21776300 | 0.00878800  | -0.79838100 |
| C | -4.26122500 | -2.06412200 | -0.20009200 |
| C | -4.87028300 | -1.39260200 | 1.02207700  |
| C | -5.04195300 | 0.09606400  | 0.75598200  |
| N | -3.00191200 | -1.41656100 | -0.54143200 |
| C | -2.38189600 | -2.06447400 | -1.69451000 |
| C | -3.87759300 | 2.11564500  | 0.17508800  |
| H | -0.15902300 | 3.77393500  | -1.19599200 |
| H | 0.20019200  | 2.38787000  | -0.16073300 |
| H | 1.20065200  | 0.01819500  | -2.83482900 |
| H | 0.95435000  | 0.22683600  | -1.09568500 |
| H | 1.57928200  | 2.37897300  | -2.24460100 |
| H | -4.07026300 | -3.12170800 | -0.00205200 |
| H | -5.83391300 | -1.84743700 | 1.26170200  |
| H | -4.19701100 | -1.52509600 | 1.87176500  |
| H | -5.41436300 | 0.60513300  | 1.64833700  |
| H | -2.40175300 | -3.14213300 | -1.51398600 |
| H | -2.97086000 | -1.88148000 | -2.61421600 |
| H | -4.43461500 | 2.52651300  | 1.02048800  |
| H | -4.46443100 | 2.33906100  | -0.73664600 |

|   |             |             |             |
|---|-------------|-------------|-------------|
| N | -3.75970000 | 0.67694900  | 0.38531900  |
| H | -0.39299500 | -1.80007900 | -0.96573200 |
| H | -0.47381900 | -2.18023700 | -2.69341500 |
| H | -2.62470400 | 3.86781000  | 0.03997100  |
| H | -1.96287400 | 2.54937000  | 1.00650200  |
| H | -4.97356400 | -2.00379400 | -1.04557500 |
| H | -5.78686000 | 0.24161600  | -0.05000700 |
| H | -3.96453000 | 0.11066300  | -1.64070100 |
| H | -1.23972100 | 0.07292000  | -3.20377500 |
| H | 0.11782400  | 2.27400600  | -3.21349400 |
| H | -2.18953100 | 2.66345900  | -2.02960900 |

| <b>cat3_Dimer2</b>  | Energy (E)   | Energy(E)+ZPE | Enthalpy (H) | Gibbs free energy (G) |
|---------------------|--------------|---------------|--------------|-----------------------|
| <b>IEFPCM (THF)</b> | -1287.354484 | -1286.622618  | -1286.596791 | -1286.670574          |

|   |             |             |             |
|---|-------------|-------------|-------------|
| C | -2.70900500 | 2.38845400  | 0.92284100  |
| C | -0.54416200 | -1.06803700 | -2.28811800 |
| C | -2.87665100 | 1.17932100  | 0.00995500  |
| C | -1.76899700 | -0.49584000 | -1.58725800 |
| B | -1.48522400 | 0.38963600  | -0.23130700 |
| C | -3.00935100 | -1.38619300 | -1.61498200 |
| C | -4.10805000 | 0.27343600  | 0.14053600  |
| C | -4.25944600 | -0.61782000 | -1.11773100 |
| C | -0.39009900 | 1.45115600  | -0.73566900 |
| C | 0.57160300  | 3.62488600  | -0.55637800 |
| C | 1.96480500  | 3.04585400  | -0.72621200 |
| C | 1.93918600  | 1.72453100  | -1.48863700 |
| N | -0.28389400 | 2.64434800  | 0.09359200  |
| C | -1.59943000 | 3.26995100  | 0.32816200  |
| C | 0.62404500  | -0.07828800 | -2.30826900 |
| H | -3.21237800 | -1.69637200 | -2.64819200 |
| H | -2.84049000 | -2.31685300 | -1.07263600 |
| H | -5.01866600 | 0.87992300  | 0.22399700  |
| H | -4.08317100 | -0.34038400 | 1.04265300  |
| H | -5.09003900 | -1.31517600 | -0.97364300 |
| H | 0.61536400  | 4.53025600  | 0.05442600  |
| H | 2.58348100  | 3.73244700  | -1.31016300 |
| H | 3.74624800  | 1.64711700  | 0.40343900  |
| H | 2.91624900  | 1.25123900  | -1.49170900 |
| H | -1.41685400 | 4.13554000  | 0.97084700  |
| H | -1.98783300 | 3.66150600  | -0.63122400 |
| H | 1.56028800  | -0.56333400 | -2.58629900 |
| H | 0.40152500  | 0.66964900  | -3.07414400 |
| N | 0.92216800  | 0.70680600  | -1.04002800 |
| H | -2.49832600 | 2.12142600  | 1.96062100  |
| H | -3.61752800 | 3.00306800  | 0.95001900  |
| H | -0.76550700 | -1.27157600 | -3.34464300 |
| H | -0.27347300 | -2.00551800 | -1.82926500 |



|   |             |             |             |
|---|-------------|-------------|-------------|
| H | 0.15345200  | 3.90752000  | -1.54244400 |
| H | 1.68898000  | 1.97686800  | -2.52301100 |
| H | -0.70467900 | 1.80102600  | -1.74109300 |
| H | -3.01995200 | 1.64792500  | -0.97753600 |
| H | -4.56083800 | 0.04892600  | -1.93370600 |
| H | -2.07016800 | 0.34570800  | -2.23003400 |
| C | 1.32750900  | 1.25730900  | 2.07899800  |
| C | 1.98692000  | -2.78945600 | -1.05879300 |
| C | 2.29423200  | 0.30707600  | 1.37968600  |
| C | 2.59029500  | -1.59299600 | -0.32790300 |
| B | 1.54550700  | -0.45029300 | 0.16095400  |
| C | 3.97267400  | -1.07738500 | -0.73496400 |
| C | 3.72391200  | 0.79247600  | 1.07700200  |
| C | 4.59318100  | -0.32726700 | 0.46322000  |
| C | 0.31942500  | -1.26261400 | 0.87738700  |
| C | -1.76789900 | -1.00257800 | 2.11064900  |
| C | -2.28528700 | -2.29534500 | 1.51903600  |
| C | -1.11656800 | -3.17644500 | 1.10085400  |
| N | -0.76432600 | -0.29752400 | 1.25022000  |
| C | -0.09444800 | 0.67170800  | 2.26243400  |
| C | 0.87063700  | -3.37741100 | -0.17999900 |
| H | 4.63473800  | -1.91268500 | -0.99455900 |
| H | 3.94049400  | -0.44183500 | -1.62647600 |
| H | 4.21088300  | 1.13514400  | 1.99844700  |
| H | 2.42857300  | 2.94843700  | 0.24897900  |
| H | 5.56710600  | 0.08638300  | 0.18618600  |
| H | -2.56275100 | -0.29781100 | 2.35090100  |
| H | -2.86713700 | -2.80418700 | 2.29231600  |
| H | -2.94690000 | -2.10797800 | 0.68424200  |
| H | -1.48195400 | -4.06168500 | 0.57389300  |
| H | -0.79154600 | 1.48561900  | 2.41892800  |
| H | -0.05200400 | 0.08570400  | 3.18050600  |
| H | 0.38857600  | -4.21439600 | -0.69342900 |
| H | 1.35490100  | -3.79293800 | 0.72445900  |
| N | -0.20305600 | -2.45574500 | 0.22634600  |
| H | 1.23164200  | 2.20088100  | 1.56347100  |
| H | 1.66145300  | 1.48210900  | 3.10074000  |
| H | 2.73689700  | -3.58126600 | -1.17877500 |
| H | 1.62336500  | -2.56369800 | -2.06138800 |
| H | -1.26069500 | -1.26890800 | 3.04228400  |
| H | -0.58477000 | -3.52713200 | 2.00793900  |
| H | 0.73988700  | -1.58999200 | 1.85518300  |
| H | 2.45607300  | -0.51640800 | 2.08984300  |
| H | 4.78415000  | -1.07527000 | 1.24126800  |
| H | 2.79149100  | -2.03181900 | 0.66455900  |

| <b>cat3_im2_CP1</b> | Energy (E)   | Energy(E)+ZPE | Enthalpy (H) | Gibbs free energy (G) |
|---------------------|--------------|---------------|--------------|-----------------------|
| <b>IEFPCM (THF)</b> | -1126.701925 | -1126.095013  | -1126.070537 | -1126.143906          |

|   |             |             |             |
|---|-------------|-------------|-------------|
| C | 0.03066500  | -0.85512000 | -2.42479500 |
| C | 3.29298900  | 1.05899500  | 1.10625700  |
| C | 1.45662900  | -0.82241000 | -1.89006800 |
| C | 2.98909500  | 0.00517200  | 0.03696500  |
| B | 1.43198300  | -0.11634000 | -0.42126300 |
| C | 3.72486100  | -1.33418700 | 0.09913800  |
| C | 2.12926100  | -2.19082800 | -1.79035800 |
| C | 3.56833200  | -2.07914500 | -1.24520600 |
| C | 0.93216600  | 1.40673600  | -0.64196400 |
| C | -1.29997200 | 2.45628300  | -0.94258000 |
| C | -0.96189100 | 3.41091500  | 0.19468400  |
| C | 0.54876300  | 3.56009700  | 0.33559800  |
| N | -0.53915900 | 1.16954500  | -0.86826900 |
| C | -0.70087200 | 0.47853600  | -2.21708700 |
| C | 2.59335500  | 2.37424200  | 0.75257300  |
| H | 4.79651700  | -1.18723400 | 0.28671000  |
| H | 3.36074500  | -1.95636300 | 0.92121200  |
| H | 2.16746000  | -2.70329500 | -2.76088900 |
| H | 1.52649700  | -2.82488000 | -1.13287300 |
| H | 4.00640300  | -3.07860500 | -1.16621200 |
| H | -2.36298600 | 2.22563000  | -0.99843200 |
| H | -1.42140300 | 4.37460200  | -0.03577300 |
| H | -1.37956500 | 3.06620800  | 1.14141700  |
| H | 0.78119000  | 4.18738600  | 1.19870400  |
| H | -1.77555600 | 0.37675500  | -2.37220300 |
| H | -0.31637800 | 1.21068900  | -2.92958600 |
| H | 2.72787700  | 3.10016600  | 1.55849100  |
| H | 3.06922800  | 2.80177300  | -0.15021600 |
| C | -0.92916100 | 0.27183400  | 0.32285700  |
| N | 0.12664000  | -0.69964100 | 0.40954400  |
| C | 0.16149200  | -1.44161000 | 1.70010500  |
| N | 1.14523900  | 2.24679900  | 0.52237800  |
| H | 2.99313900  | 0.76198100  | 2.10787900  |
| H | 4.37013000  | 1.26578300  | 1.15074100  |
| H | -0.02479000 | -1.05128200 | -3.50334400 |
| H | -0.50988300 | -1.65495100 | -1.92935500 |
| H | 2.06403700  | -0.19592700 | -2.56174400 |
| H | 3.39224700  | 0.47405900  | -0.87979500 |
| H | 1.29623300  | 1.90699800  | -1.55985000 |
| H | 0.95933400  | 4.06025500  | -0.56257800 |
| C | -1.20320300 | -1.56131300 | 2.40957800  |
| H | -1.63329900 | -0.59220300 | 2.67249600  |
| H | -1.93437700 | -2.11873700 | 1.82845900  |
| H | -1.03916700 | -2.10437000 | 3.34195800  |
| C | 0.62092500  | -2.87739300 | 1.42982000  |

|   |             |             |             |
|---|-------------|-------------|-------------|
| H | 0.68394200  | -3.43875200 | 2.36606700  |
| H | -0.08880400 | -3.37901600 | 0.76746900  |
| H | 1.59908600  | -2.89497100 | 0.95596000  |
| C | 1.11291100  | -0.79422600 | 2.71413100  |
| H | 0.99772500  | -1.25001200 | 3.70101600  |
| H | 2.14334600  | -0.93117800 | 2.39966800  |
| H | 0.90982600  | 0.27651600  | 2.79311100  |
| H | -0.93960300 | 0.97491800  | 1.16759300  |
| C | -2.36608500 | -0.21065300 | 0.12065700  |
| C | -3.41777200 | 0.59326600  | 0.56530600  |
| C | -2.67290900 | -1.44145300 | -0.46036300 |
| C | -4.74393100 | 0.21025600  | 0.38398100  |
| H | -3.19740500 | 1.52049000  | 1.08429900  |
| C | -3.99517600 | -1.82975800 | -0.64464400 |
| H | -1.86342700 | -2.11152100 | -0.71150300 |
| C | -5.03624000 | -1.00019600 | -0.23450100 |
| H | -5.54340100 | 0.84864400  | 0.73883600  |
| H | -4.21320800 | -2.79010200 | -1.09519600 |
| H | -6.06519600 | -1.30647200 | -0.37495600 |
| H | 4.16428900  | -1.53891300 | -1.99081100 |
| H | -0.99514200 | 2.91246700  | -1.88652500 |

| <b>cat3_im2_CP2</b> | <b>Energy (E)</b> | <b>Energy(E)+ZPE</b> | <b>Enthalpy (H)</b> | <b>Gibbs free energy (G)</b> |
|---------------------|-------------------|----------------------|---------------------|------------------------------|
| <b>IEFPCM (THF)</b> | -1126.702636      | -1126.103254         | -1126.075473        | -1126.160119                 |

|   |             |             |             |
|---|-------------|-------------|-------------|
| C | -0.01897800 | -0.58125100 | 2.42591700  |
| C | -0.76328300 | -2.37452800 | -2.16189100 |
| C | 0.34511600  | -1.84108300 | 1.63395600  |
| C | -0.07367300 | -2.83189500 | -0.87323300 |
| B | -0.53938100 | -1.96959100 | 0.34939500  |
| C | 1.45154900  | -2.95732600 | -0.97484200 |
| C | 1.84266100  | -2.01908100 | 1.35093600  |
| C | 2.10715600  | -3.18492900 | 0.39169300  |
| C | -2.00927300 | -1.38452300 | 0.35672800  |
| C | -3.57263000 | 0.09845900  | 1.39369400  |
| C | -4.17552800 | 0.40722500  | 0.03001300  |
| C | -3.92099500 | -0.74690400 | -0.93055400 |
| N | -2.16287400 | -0.23426400 | 1.24338900  |
| C | -1.53315200 | -0.44066900 | 2.54386000  |
| C | -2.25232400 | -2.14283800 | -1.92884800 |
| H | 1.72217100  | -3.76153000 | -1.66682800 |
| H | 1.85488900  | -2.03141000 | -1.39708400 |
| H | 2.39116800  | -2.16642400 | 2.28674700  |
| H | 2.23536400  | -1.10155200 | 0.90254900  |
| H | 3.18488600  | -3.31363700 | 0.26229100  |
| H | -3.66130200 | 0.96628400  | 2.05253200  |
| H | -5.24978000 | 0.58060500  | 0.12575100  |
| H | -3.71236300 | 1.31288100  | -0.36498200 |

|   |             |             |             |
|---|-------------|-------------|-------------|
| H | -4.26393600 | -0.48901800 | -1.93552000 |
| H | -1.77691400 | 0.42784400  | 3.16083900  |
| H | -2.73774000 | -1.87227900 | -2.86945700 |
| H | -2.72276400 | -3.08318900 | -1.58222100 |
| N | -2.49693300 | -1.05693100 | -0.98476400 |
| H | 1.72502600  | -4.11559300 | 0.82912400  |
| H | -0.32124500 | -1.43123400 | -2.49991000 |
| H | -0.62502200 | -3.10531200 | -2.96499000 |
| H | 0.42677100  | -0.60406500 | 3.42539000  |
| H | 0.36941600  | 0.30533000  | 1.91417600  |
| H | 0.01143800  | -2.71161600 | 2.23112400  |
| H | -1.95256400 | -1.32913400 | 3.05404600  |
| H | -4.12286400 | -0.73907000 | 1.86333800  |
| H | -4.49383800 | -1.63351300 | -0.59692700 |
| H | -2.63422900 | -2.23644500 | 0.76271700  |
| H | -0.47742200 | -3.83056000 | -0.62061000 |
| C | 1.21251200  | 1.86787100  | -0.80739500 |
| H | 0.73758500  | 1.48849400  | -1.71780700 |
| N | 0.68492000  | 2.74123900  | -0.05730200 |
| C | -0.62414800 | 3.31718400  | -0.38326500 |
| C | -1.46135100 | 3.19631400  | 0.89433800  |
| H | -0.93049400 | 3.65869300  | 1.72814800  |
| H | -2.42384700 | 3.69822800  | 0.76386300  |
| H | -1.63308500 | 2.14139600  | 1.11610200  |
| C | -1.36556800 | 2.65237700  | -1.54547900 |
| H | -0.83256000 | 2.77738800  | -2.49170700 |
| H | -1.52510800 | 1.58639500  | -1.35837800 |
| H | -2.34170600 | 3.12920900  | -1.65871100 |
| C | -0.36824900 | 4.79562700  | -0.69677300 |
| H | -1.31565100 | 5.31702200  | -0.84924600 |
| H | 0.16698300  | 5.26508900  | 0.12944300  |
| H | 0.23573100  | 4.89458800  | -1.60121900 |
| C | 2.53047300  | 1.27577200  | -0.49525600 |
| C | 3.11729500  | 0.39491200  | -1.40371600 |
| C | 3.18698800  | 1.56544400  | 0.70512400  |
| C | 4.33837700  | -0.20827900 | -1.11484800 |
| H | 2.61015400  | 0.17800000  | -2.33801000 |
| C | 4.40455700  | 0.96512700  | 0.99264900  |
| H | 2.71515500  | 2.25467800  | 1.39343500  |
| C | 4.98087600  | 0.07365500  | 0.08636400  |
| H | 4.78309000  | -0.89652800 | -1.82293800 |
| H | 4.90703200  | 1.18487600  | 1.92636400  |
| H | 5.92825700  | -0.39722600 | 0.31731700  |

| <b>cat3_am2_CP</b>  | Energy (E)   | Energy(E)+ZPE | Enthalpy (H) | Gibbs free energy (G) |
|---------------------|--------------|---------------|--------------|-----------------------|
| <b>IEFPCM (THF)</b> | -1127.908787 | -1127.278807  | -1127.252905 | -1127.329861          |

|   |             |             |             |
|---|-------------|-------------|-------------|
| C | -1.82249600 | 0.31521500  | 2.48599700  |
| C | -1.46726900 | 0.72032200  | -2.65396000 |
| C | -2.53399000 | 0.11949500  | 1.14106300  |
| C | -2.33319700 | 0.30691300  | -1.46662200 |
| B | -1.50867200 | 0.24114000  | -0.09049400 |
| C | -3.41026200 | -0.76054100 | -1.65159000 |
| C | -3.61166300 | -0.96077700 | 0.96211400  |
| C | -4.32093900 | -0.80537100 | -0.40302300 |
| C | -0.75388500 | 1.67410500  | 0.07437000  |
| C | 0.72113400  | 2.95651100  | 1.52745400  |
| C | 1.58628700  | 3.27969100  | 0.31878500  |
| C | 0.71233600  | 3.32052600  | -0.92465000 |
| N | -0.01165900 | 1.70075300  | 1.34857200  |
| C | -0.98490800 | 1.60093300  | 2.45376500  |
| C | -0.75921400 | 2.04485600  | -2.31572000 |
| N | 0.05785800  | 2.03379100  | -1.09437300 |
| C | 0.95597600  | -0.74698000 | -0.97217600 |
| N | -0.08061900 | -0.99620900 | 0.08131200  |
| C | -0.19285200 | -2.49602600 | 0.36852200  |
| C | -0.68232100 | -2.74329300 | 1.79529700  |
| C | -1.14467900 | -3.13553700 | -0.63584700 |
| C | 1.15928200  | -3.22729200 | 0.27490500  |
| C | 2.40072400  | -0.74374500 | -0.51795600 |
| C | 2.79993100  | -0.12761700 | 0.67035400  |
| C | 3.38091400  | -1.28731500 | -1.35043200 |
| C | 4.14633200  | -0.08253200 | 1.02421100  |
| C | 4.72621100  | -1.23387700 | -1.00321400 |
| C | 5.11406900  | -0.63630800 | 0.19238600  |
| H | 0.76926500  | 0.24719800  | -1.36774900 |
| H | 0.98548900  | -4.26168100 | 0.57716500  |
| H | 1.56890100  | -3.24658100 | -0.73346000 |
| H | 1.90586000  | -2.79910600 | 0.94275500  |
| H | -0.77134300 | -3.82086100 | 1.94501600  |
| H | 0.04416600  | -2.36795300 | 2.52113800  |
| H | -1.64710300 | -2.29669800 | 1.99819400  |
| H | -1.07903200 | -4.22204600 | -0.55246000 |
| H | -3.21458300 | -1.97345900 | 1.03769700  |
| H | -0.88765600 | -2.85866500 | -1.66046800 |
| H | 3.08418900  | -1.76482300 | -2.27866900 |
| H | 5.46960800  | -1.66577100 | -1.66197000 |
| H | 6.15994300  | -0.59891200 | 0.47027900  |
| H | 4.43876800  | 0.39571000  | 1.95121800  |
| H | 2.05885900  | 0.34463600  | 1.30703800  |
| H | 0.00740700  | 3.78808900  | 1.67547700  |
| H | 1.32723400  | 2.87973200  | 2.43492100  |

|   |             |             |             |
|---|-------------|-------------|-------------|
| H | 2.35816600  | 2.51907300  | 0.18864000  |
| H | 2.07358700  | 4.24539800  | 0.47035400  |
| H | -0.03678300 | 4.12934000  | -0.82223200 |
| H | 1.31108700  | 3.53244200  | -1.81407800 |
| H | -0.09997300 | 2.33852800  | -3.13722800 |
| H | -1.53786300 | 2.82601900  | -2.23129100 |
| H | -0.74020000 | -0.05025200 | -2.92310600 |
| H | -2.07444000 | 0.89984600  | -3.54963100 |
| H | -2.92154500 | 1.21722500  | -1.25221800 |
| H | -4.03911800 | -0.51941500 | -2.51767600 |
| H | -2.98276300 | -1.74143100 | -1.86081700 |
| H | -4.88242400 | 0.13603300  | -0.37752100 |
| H | -5.06178400 | -1.60214900 | -0.51573200 |
| H | -4.37011700 | -0.88243100 | 1.75092100  |
| H | -2.17053000 | -2.83812000 | -0.44671100 |
| H | -3.09955900 | 1.05756800  | 1.01157800  |
| H | -2.53561800 | 0.40775100  | 3.31414500  |
| H | -1.16331300 | -0.51189700 | 2.74422000  |
| H | -1.67327800 | 2.46362200  | 2.40223000  |
| H | -0.42354700 | 1.69494500  | 3.38747700  |
| H | -1.56562600 | 2.44395100  | 0.15096200  |
| H | 0.27650600  | -0.54963700 | 0.92869600  |
| H | 0.81032300  | -1.47739800 | -1.76741600 |

| <b>cat3_THF_CP</b>  | <b>Energy (E)</b> | <b>Energy(E)+ZPE</b> | <b>Enthalpy (H)</b> | <b>Gibbs free energy (G)</b> |
|---------------------|-------------------|----------------------|---------------------|------------------------------|
| <b>IEFPCM (THF)</b> | -876.179752       | -875.696491          | -875.677104         | -875.741369                  |

|   |             |             |             |
|---|-------------|-------------|-------------|
| C | 0.43158500  | 0.74135300  | 2.44272700  |
| C | 0.37660100  | -1.79059400 | -1.94608200 |
| C | 1.10909700  | -0.42710600 | 1.73010600  |
| C | 1.07097900  | -1.77468500 | -0.58485300 |
| B | 0.45959700  | -0.59746300 | 0.29051100  |
| C | 2.60244400  | -1.82781500 | -0.55155300 |
| C | 2.63865900  | -0.45547700 | 1.68200400  |
| C | 3.13685100  | -1.68445900 | 0.89068500  |
| C | -1.13803900 | -0.67100500 | 0.35218400  |
| C | -3.14331800 | 0.30421300  | 1.25594300  |
| C | -3.77488300 | 0.25158100  | -0.12889000 |
| N | -1.71131800 | -0.73181600 | -0.99749100 |
| C | -3.15913500 | -0.88476800 | -0.93418500 |
| N | -1.69899100 | 0.44033800  | 1.13275800  |
| C | -1.08593300 | 0.51929900  | 2.46136300  |
| C | -1.14306600 | -1.85372000 | -1.75140000 |
| H | 2.96521400  | -2.77799700 | -0.96043000 |
| H | 3.03549600  | -1.05617700 | -1.19367800 |
| H | 3.06448200  | -0.49714500 | 2.69140900  |
| H | 3.02480400  | 0.47137100  | 1.24358700  |
| H | 2.82647400  | -2.57630800 | 1.44774000  |

|   |             |             |             |
|---|-------------|-------------|-------------|
| H | 4.23051500  | -1.69607500 | 0.87693100  |
| H | -3.53389000 | 1.15101800  | 1.82705900  |
| H | -4.85409200 | 0.10549900  | -0.04348200 |
| H | -3.59754400 | 1.19879500  | -0.64413400 |
| H | -3.56081100 | -0.89803400 | -1.95122500 |
| H | -1.57710800 | 1.33822200  | 2.99401000  |
| H | -1.29456900 | -0.40615100 | 3.03089300  |
| H | -1.64085100 | -1.87259800 | -2.72500200 |
| H | -1.38665700 | -2.80915900 | -1.24829500 |
| H | -0.45605800 | 1.49763600  | -2.12626600 |
| C | -0.22491200 | 1.83867400  | -1.11580400 |
| C | 0.47712600  | 3.19428100  | -1.09476800 |
| O | 0.77524600  | 0.93314700  | -0.56346100 |
| H | -1.09759200 | 1.75676500  | -0.48027400 |
| C | 1.98241500  | 2.84991200  | -1.17736000 |
| H | 0.14429600  | 3.81877600  | -1.92296200 |
| H | 0.25595500  | 3.71764900  | -0.16526000 |
| C | 2.00699600  | 1.32152100  | -1.20716100 |
| H | 2.46379700  | 3.26464400  | -2.06203300 |
| H | 2.51102600  | 3.21906400  | -0.29921200 |
| H | 2.83192800  | 0.88473600  | -0.66180500 |
| H | 1.99612300  | 0.93532700  | -2.23032900 |
| H | 0.67912300  | -2.64748300 | -2.55924300 |
| H | 0.62276900  | -0.88786500 | -2.51602300 |
| H | 0.65013200  | 1.68035300  | 1.92201400  |
| H | 0.77530700  | 0.85491000  | 3.47741200  |
| H | 0.80236200  | -1.34226800 | 2.26396600  |
| H | 0.72839200  | -2.67625800 | -0.04965900 |
| H | -1.38985400 | -1.62823100 | 0.88471300  |
| H | -3.42613500 | -1.84819900 | -0.45805200 |
| H | -3.40161400 | -0.61955700 | 1.80817500  |

| cat4_im2_CPI | Energy (E)   | Energy(E)+ZPE | Enthalpy (H) | Gibbs free energy (G) |
|--------------|--------------|---------------|--------------|-----------------------|
| IEFPCM (THF) | -1523.807986 | -1523.232628  | -1523.204969 | -1523.284983          |

|   |             |             |             |
|---|-------------|-------------|-------------|
| C | -0.26084000 | -1.72447800 | -1.84284600 |
| C | 3.16850800  | 1.23269400  | 0.49803100  |
| C | 1.14164200  | -1.56483100 | -1.35797300 |
| C | 2.73887100  | -0.13564800 | 0.04931200  |
| B | 1.14834800  | -0.33498700 | -0.27564100 |
| C | 3.44628000  | -1.36559300 | 0.62043400  |
| C | 1.81224600  | -2.83218500 | -0.82229100 |
| C | 3.25816100  | -2.54343800 | -0.36271500 |
| C | 0.72660900  | 0.99038300  | -1.11332100 |
| C | -1.47306500 | 1.97302600  | -1.75122800 |
| C | -1.00943300 | 3.29295000  | -1.14809400 |
| C | 0.51215800  | 3.37925400  | -1.13180000 |
| N | -0.76497500 | 0.79246200  | -1.15763200 |

|   |             |             |             |
|---|-------------|-------------|-------------|
| C | -1.03519800 | -0.39654900 | -2.05423800 |
| C | 2.50494000  | 2.34309300  | -0.31155000 |
| H | 4.51756700  | -1.17597000 | 0.73321400  |
| H | 3.06856300  | -1.62407300 | 1.61049700  |
| H | 1.84317200  | -3.61597400 | -1.58661000 |
| H | 1.22388300  | -3.22952300 | 0.00293300  |
| H | 3.68093500  | -3.45307500 | 0.07165100  |
| H | -2.54574600 | 1.81744100  | -1.64136400 |
| H | -1.42738800 | 4.09659700  | -1.75784900 |
| H | -1.38960900 | 3.41972400  | -0.13521400 |
| H | 0.82700200  | 4.29103500  | -0.62106700 |
| H | -2.10537600 | -0.59213500 | -2.03928900 |
| H | -0.75132200 | -0.06525200 | -3.05157200 |
| H | 2.74346000  | 3.28948000  | 0.17602900  |
| H | 2.98298700  | 2.34119600  | -1.30512100 |
| C | -1.10876800 | 0.53774500  | 0.32796400  |
| N | -0.14914200 | -0.46206100 | 0.70623300  |
| C | -0.11954000 | -0.82436500 | 2.15147600  |
| N | 1.05291700  | 2.22506500  | -0.42568400 |
| H | 1.70361700  | -1.23201400 | -2.24134200 |
| H | 3.10781100  | -0.09242500 | -0.98973100 |
| H | 1.05829900  | 1.02734500  | -2.16874600 |
| H | 0.89727600  | 3.42340100  | -2.16776400 |
| C | -1.47364900 | -0.68862600 | 2.86999500  |
| H | -1.84016300 | 0.33939200  | 2.88763900  |
| H | -2.24442500 | -1.32687000 | 2.44343300  |
| H | -1.32116800 | -0.99470900 | 3.90642300  |
| C | 0.27462800  | -2.29785800 | 2.27636000  |
| H | 0.26111800  | -2.60189600 | 3.32598700  |
| H | -0.42687200 | -2.91714800 | 1.71411900  |
| H | 1.27591100  | -2.47342900 | 1.89202500  |
| C | 0.86935600  | 0.03775100  | 2.94002100  |
| H | 0.77102800  | -0.15525300 | 4.01160200  |
| H | 1.89278400  | -0.17149900 | 2.65115600  |
| H | 0.68606100  | 1.09896800  | 2.75985300  |
| H | -0.92518400 | 1.51720200  | 0.78993000  |
| C | -2.61032500 | 0.28002400  | 0.43306100  |
| C | -3.43206200 | 1.34784000  | 0.80162500  |
| C | -3.20245500 | -0.95717900 | 0.17152500  |
| C | -4.81374000 | 1.20016000  | 0.87952700  |
| H | -2.98384100 | 2.30214800  | 1.05746300  |
| C | -4.58347500 | -1.10720900 | 0.24540400  |
| H | -2.57370700 | -1.80234300 | -0.06250500 |
| C | -5.39446400 | -0.03037100 | 0.59360600  |
| H | -5.43032600 | 2.04005700  | 1.17427100  |
| H | -5.02576900 | -2.07449800 | 0.04182600  |
| H | -6.46836000 | -0.15428000 | 0.65587800  |
| H | 3.85609000  | -2.32068800 | -1.25442100 |



|   |             |             |             |
|---|-------------|-------------|-------------|
| H | -1.21995500 | 1.95937100  | -2.81294700 |
| F | 2.99526600  | 1.49379200  | 1.82968900  |
| F | 4.52963000  | 1.39621300  | 0.29247500  |
| F | -0.97851400 | -2.58504700 | -1.05588200 |
| F | -0.32971600 | -2.30308900 | -3.10253900 |

| cat4_im2_CP2        | Energy (E)   | Energy(E)+ZPE | Enthalpy (H) | Gibbs free energy (G) |
|---------------------|--------------|---------------|--------------|-----------------------|
| <b>IEFPCM (THF)</b> | -1523.828321 | -1523.259677  | -1523.22917  | -1523.319094          |

|   |             |             |             |
|---|-------------|-------------|-------------|
| C | -0.60243800 | -1.30614400 | -1.42632400 |
| C | 3.64570000  | 0.53224600  | 0.50554600  |
| C | 0.87792400  | -1.67540200 | -1.35733100 |
| C | 3.18869900  | -0.66340700 | -0.33577600 |
| B | 1.74843200  | -0.45621100 | -0.92116600 |
| C | 3.33120900  | -2.00744200 | 0.33816000  |
| C | 1.17693200  | -2.94810300 | -0.55532700 |
| C | 2.68599800  | -3.16230900 | -0.39912800 |
| C | 1.28925600  | 1.00484600  | -1.28709400 |
| C | -0.53737900 | 2.45019600  | -1.91267700 |
| C | 0.02685900  | 3.51990300  | -0.98933100 |
| C | 1.52897200  | 3.33940100  | -0.82592300 |
| N | -0.16987700 | 1.13571000  | -1.37509700 |
| C | -0.79958900 | 0.05940500  | -2.04180300 |
| C | 3.27407600  | 1.83428900  | -0.19671300 |
| H | 0.72640300  | -3.82329900 | -1.02969900 |
| H | 0.73335500  | -2.86017800 | 0.43979900  |
| H | 2.90233000  | -4.07056300 | 0.16552100  |
| H | -1.62146600 | 2.51765100  | -1.96546100 |
| H | -0.18609700 | 4.51039100  | -1.39713300 |
| H | -0.44641200 | 3.42895300  | -0.01136900 |
| H | 1.92086800  | 4.05735800  | -0.10172500 |
| H | 3.62931100  | 2.67911600  | 0.39713500  |
| H | 3.78918500  | 1.89080800  | -1.17563600 |
| N | 1.83104700  | 1.99286100  | -0.35476300 |
| H | 3.16835500  | -3.25143800 | -1.37662000 |
| H | 3.14483600  | 0.50541600  | 1.47331000  |
| H | 4.72334500  | 0.49405000  | 0.67841800  |
| H | -1.17086400 | -2.01406800 | -2.03359000 |
| H | -1.05360800 | -1.27984900 | -0.43280900 |
| H | 1.22717400  | -1.83459300 | -2.39357200 |
| H | -0.13158400 | 2.57369000  | -2.92811500 |
| H | 2.02927200  | 3.53130800  | -1.79511400 |
| H | 1.72154700  | 1.19859200  | -2.30651300 |
| H | 3.81913400  | -0.71551600 | -1.23915500 |
| C | -2.73438200 | 0.40356500  | 1.22178300  |
| H | -3.34938500 | 1.26967000  | 0.95927700  |
| N | -3.08316700 | -0.79212900 | 0.98587200  |
| C | -4.38371000 | -1.08571400 | 0.37178400  |

|   |             |             |             |
|---|-------------|-------------|-------------|
| C | -4.12177200 | -2.08551600 | -0.75873300 |
| H | -3.53105900 | -2.92214000 | -0.38178000 |
| H | -5.06728400 | -2.46636000 | -1.15087700 |
| H | -3.57514300 | -1.60278500 | -1.56843000 |
| C | -5.13727700 | 0.12252000  | -0.18921700 |
| H | -5.43611500 | 0.82106400  | 0.59570900  |
| H | -4.52697600 | 0.64998000  | -0.92539300 |
| H | -6.04595600 | -0.22400000 | -0.68432000 |
| C | -5.21856100 | -1.76266200 | 1.46536400  |
| H | -6.17775400 | -2.09075900 | 1.05909000  |
| H | -4.68510300 | -2.62803600 | 1.86018600  |
| H | -5.40369400 | -1.06716700 | 2.28631100  |
| C | -1.45865500 | 0.72974700  | 1.88957100  |
| C | -1.18673000 | 2.05763900  | 2.21580500  |
| C | -0.53170500 | -0.26274700 | 2.22092700  |
| C | 0.00082900  | 2.40022300  | 2.85409500  |
| H | -1.91412900 | 2.82446200  | 1.96987300  |
| C | 0.65630800  | 0.07790600  | 2.85386100  |
| H | -0.77385000 | -1.29357600 | 1.99331700  |
| C | 0.92418600  | 1.41065500  | 3.16953100  |
| H | 0.20356700  | 3.43472800  | 3.10278500  |
| H | 1.37522500  | -0.69191600 | 3.09899100  |
| H | 1.85183400  | 1.67203900  | 3.66412500  |
| F | 2.76226900  | -1.93939300 | 1.59546600  |
| F | 4.65817100  | -2.28935800 | 0.55195900  |
| F | -2.14400300 | 0.32150800  | -2.10836600 |
| F | -0.39042900 | -0.00338600 | -3.37451500 |

| <b>cat4_am2_CP</b>  | <b>Energy (E)</b> | <b>Energy(E)+ZPE</b> | <b>Enthalpy (H)</b> | <b>Gibbs free energy (G)</b> |
|---------------------|-------------------|----------------------|---------------------|------------------------------|
| <b>IEFPCM (THF)</b> | -1525.024242      | -1524.425181         | -1524.396215        | -1524.480069                 |

|   |             |             |             |
|---|-------------|-------------|-------------|
| C | -1.05159800 | -1.16405800 | 2.38425700  |
| C | -1.87496400 | 1.75797400  | -1.67364600 |
| C | -1.98608200 | -0.83914300 | 1.25351700  |
| C | -2.41070100 | 0.66933300  | -0.79942500 |
| B | -1.23219200 | 0.04727900  | 0.12598400  |
| C | -3.51429400 | -0.25260600 | -1.32076300 |
| C | -2.99999800 | -1.85524000 | 0.71013900  |
| C | -4.05036800 | -1.11847300 | -0.15502700 |
| C | -0.63726600 | 1.33801400  | 0.93887800  |
| C | 1.04162800  | 1.96117300  | 2.60858100  |
| C | 1.60708400  | 2.96231200  | 1.61459100  |
| C | 0.47356300  | 3.49893300  | 0.75227900  |
| N | 0.35715400  | 0.86877700  | 1.91613100  |
| C | -0.33686800 | 0.06907500  | 2.92751400  |
| C | -1.18061800 | 2.85561700  | -0.86454200 |
| N | -0.14187400 | 2.38799800  | 0.04494200  |

|   |             |             |             |
|---|-------------|-------------|-------------|
| C | 1.19759600  | 0.11316500  | -1.16278000 |
| N | 0.20190300  | -0.83137500 | -0.55349700 |
| C | 0.15492000  | -2.15630700 | -1.35835800 |
| C | 0.01818700  | -3.35440500 | -0.41612200 |
| C | -0.99709400 | -2.10333900 | -2.35052200 |
| C | 1.44736500  | -2.42930600 | -2.15185200 |
| C | 2.64333300  | -0.13097500 | -0.79504700 |
| C | 3.04262200  | -0.51995500 | 0.48661400  |
| C | 3.62904400  | 0.12287500  | -1.75199600 |
| C | 4.39349300  | -0.67663400 | 0.78782700  |
| C | 4.97786600  | -0.02041400 | -1.44788700 |
| C | 5.36602600  | -0.42955000 | -0.17537800 |
| H | 0.93708300  | 1.11568600  | -0.83550700 |
| H | 1.32544300  | -3.41462400 | -2.60453400 |
| H | 1.61940100  | -1.72188200 | -2.96164400 |
| H | 2.32840800  | -2.46071200 | -1.51466900 |
| H | -0.12089600 | -4.24796800 | -1.02763500 |
| H | 0.92914000  | -3.48249500 | 0.17172400  |
| H | -0.81088800 | -3.27694100 | 0.27360500  |
| H | -0.87047200 | -2.89261300 | -3.09374000 |
| H | -2.53066800 | -2.63512100 | 0.11464500  |
| H | -1.02804700 | -1.14032200 | -2.86161600 |
| H | 3.33147500  | 0.42600500  | -2.75018100 |
| H | 5.72435800  | 0.17728600  | -2.20737000 |
| H | 6.41494200  | -0.55247100 | 0.06287500  |
| H | 4.68502200  | -0.98709800 | 1.78370400  |
| H | 2.30300100  | -0.67599000 | 1.26352800  |
| H | 0.33766900  | 2.48850100  | 3.27889600  |
| H | 1.83453800  | 1.53379100  | 3.22791000  |
| H | 2.34936200  | 2.47354600  | 0.97905000  |
| H | 2.09224100  | 3.77877200  | 2.15278100  |
| H | -0.26417300 | 4.01937100  | 1.39211700  |
| H | 0.84481200  | 4.21773100  | 0.01794400  |
| H | -0.73666600 | 3.55859000  | -1.57245300 |
| H | -1.98475800 | 3.38167700  | -0.32287800 |
| H | -2.93049600 | 1.24747300  | -0.02025000 |
| H | -4.34187100 | 0.35326300  | -1.69977400 |
| H | -3.18725200 | -0.86587500 | -2.15516000 |
| H | -4.61669300 | -0.45699600 | 0.51126700  |
| H | -4.76607400 | -1.84635800 | -0.54492400 |
| H | -3.51709200 | -2.35841900 | 1.53195600  |
| H | -1.94507700 | -2.26713300 | -1.84845900 |
| H | -2.61980000 | -0.07433800 | 1.72646600  |
| H | -1.09339200 | 0.67125200  | 3.45758800  |
| H | 0.38999500  | -0.28288200 | 3.66255600  |
| H | -1.49066500 | 1.77895500  | 1.51744600  |
| H | 0.59644800  | -1.08975300 | 0.34912300  |
| H | 1.06164500  | 0.09977000  | -2.23963400 |

|   |             |             |             |
|---|-------------|-------------|-------------|
| F | -1.00590800 | 1.26427900  | -2.62837600 |
| F | -2.86954000 | 2.38428200  | -2.39096200 |
| F | -0.06093500 | -2.07117800 | 2.02873600  |
| F | -1.69990400 | -1.75452300 | 3.44139700  |

| <b>cat4_THF_CP</b>  | <b>Energy (E)</b> | <b>Energy(E)+ZPE</b> | <b>Enthalpy (H)</b> | <b>Gibbs free energy (G)</b> |
|---------------------|-------------------|----------------------|---------------------|------------------------------|
| <b>IEFPCM (THF)</b> | -1273.302477      | -1272.849899         | -1272.827658        | -1272.898063                 |

|   |             |             |             |
|---|-------------|-------------|-------------|
| C | 1.87136800  | -1.46888800 | -0.87021800 |
| C | -1.63387500 | 2.06273500  | -0.25334700 |
| C | 1.50654600  | -0.07321500 | -1.27223800 |
| C | -0.34011300 | 1.78481700  | -0.95547700 |
| B | 0.17080900  | 0.33922300  | -0.49199800 |
| C | 0.74815700  | 2.86251300  | -0.94016700 |
| C | 2.59647300  | 1.00008100  | -1.24301700 |
| C | 2.01063700  | 2.36244100  | -1.68144100 |
| C | -0.97403700 | -0.75970000 | -0.72650300 |
| C | -1.52437800 | -3.10567800 | -0.56617800 |
| C | -2.79115100 | -2.73849400 | 0.19606300  |
| N | -2.19034900 | -0.37901400 | -0.00022600 |
| C | -3.25816400 | -1.34867200 | -0.21538800 |
| N | -0.50193900 | -2.09317200 | -0.33482600 |
| C | 0.71829900  | -2.45172300 | -1.04931100 |
| C | -2.65145900 | 0.93931500  | -0.42369400 |
| H | 0.39344000  | 3.76964100  | -1.43675000 |
| H | 0.98548500  | 3.15838600  | 0.08267100  |
| H | 3.41033100  | 0.73834700  | -1.92466000 |
| H | 3.05211000  | 1.05913400  | -0.25220000 |
| H | 1.74964500  | 2.27286100  | -2.74239000 |
| H | 2.78889100  | 3.12747100  | -1.62211200 |
| H | -1.14280900 | -4.07606400 | -0.23890200 |
| H | -3.57519800 | -3.46949400 | -0.01177600 |
| H | -2.58810600 | -2.75100300 | 1.26933800  |
| H | -4.13276600 | -1.04685600 | 0.36615400  |
| H | 1.06064100  | -3.42599300 | -0.69483300 |
| H | 0.54502200  | -2.52996000 | -2.13650000 |
| H | -3.53362300 | 1.20870700  | 0.16061300  |
| H | -2.93904300 | 0.94543500  | -1.48943200 |
| H | -1.00472800 | 0.14953800  | 2.55556600  |
| C | -0.17365600 | -0.44747600 | 2.18225600  |
| C | 0.93173400  | -0.66766500 | 3.21674900  |
| O | 0.47566700  | 0.34851300  | 1.14246200  |
| H | -0.52680700 | -1.35118300 | 1.70693400  |
| C | 1.97325700  | 0.43679900  | 2.92938000  |
| H | 0.52737700  | -0.60236200 | 4.22603900  |
| H | 1.37940700  | -1.65051900 | 3.08463900  |
| C | 1.30262600  | 1.29415300  | 1.86634100  |

|   |             |             |             |
|---|-------------|-------------|-------------|
| H | 2.22408100  | 1.02712800  | 3.80950900  |
| H | 2.88427500  | -0.00100200 | 2.52638300  |
| H | 1.98860900  | 1.75056600  | 1.16784400  |
| H | 0.63631400  | 2.04866200  | 2.28698900  |
| H | 1.17854400  | -0.16555300 | -2.31780400 |
| H | -0.62463500 | 1.63300600  | -2.00639200 |
| H | -1.20638000 | -0.77852200 | -1.82533400 |
| H | -3.55453700 | -1.36761200 | -1.28146700 |
| H | -1.75756900 | -3.18212300 | -1.64494500 |
| F | -1.42660500 | 2.28506100  | 1.09447700  |
| F | -2.23723400 | 3.21295400  | -0.71383100 |
| F | 2.30521700  | -1.51057700 | 0.43951700  |
| F | 2.92474200  | -1.96050700 | -1.61065100 |

| <b>cat3_im1_CPI</b> | <b>Energy (E)</b> | <b>Energy(E)+ZPE</b> | <b>Enthalpy (H)</b> | <b>Gibbs free energy (G)</b> |
|---------------------|-------------------|----------------------|---------------------|------------------------------|
| <b>IEFPCM (THF)</b> | -856.300125       | -855.805397          | -855.786285         | -855.847675                  |

|   |             |             |             |
|---|-------------|-------------|-------------|
| C | 0.70679900  | -2.15308600 | -1.33475800 |
| C | 1.02069600  | 2.51294700  | 0.70046700  |
| C | 1.61022600  | -0.92282500 | -1.24069400 |
| C | 1.80095000  | 1.43168400  | -0.04354100 |
| B | 0.89249700  | 0.11465900  | -0.22057400 |
| C | 3.21838400  | 1.09730200  | 0.42207800  |
| C | 3.00230000  | -1.23105000 | -0.68190000 |
| C | 3.84266400  | 0.04862200  | -0.51862000 |
| C | -0.54319900 | 0.54079700  | -0.82975100 |
| C | -2.78958800 | -0.55560200 | -0.85105000 |
| C | -3.39008800 | 0.81377100  | -0.51127400 |
| C | -2.43474700 | 1.96990000  | -0.80863300 |
| N | -1.33510000 | -0.72361600 | -0.52131500 |
| C | -0.78217900 | -1.79182300 | -1.46734500 |
| C | -0.26346800 | 2.82671400  | -0.07528600 |
| H | 3.85661500  | 1.99016500  | 0.43535300  |
| H | 3.21584600  | 0.71217900  | 1.44643100  |
| H | 3.55498300  | -1.94847700 | -1.30238100 |
| H | 2.87462900  | -1.70194000 | 0.30191100  |
| H | 4.84505000  | -0.21303400 | -0.16698500 |
| H | -3.34480100 | -1.36542900 | -0.37517700 |
| H | -4.30313600 | 0.91357700  | -1.10324400 |
| H | -3.67494000 | 0.86165600  | 0.53632900  |
| H | -2.84546500 | 2.89121500  | -0.38976900 |
| H | -1.42658300 | -2.66444500 | -1.35480700 |
| H | -0.95444300 | -1.37554900 | -2.46068900 |
| H | -0.82891800 | 3.61796200  | 0.42481500  |
| H | 0.01201800  | 3.20660800  | -1.07528300 |
| C | -1.00511500 | -1.06969400 | 0.96716100  |
| N | 0.38318800  | -0.70506000 | 1.04372300  |

|   |             |             |             |
|---|-------------|-------------|-------------|
| N | -1.15988100 | 1.67222500  | -0.18712900 |
| H | 1.72032800  | -0.46937600 | -2.23725900 |
| H | 1.92186000  | 1.81014700  | -1.07447700 |
| H | -0.58567800 | 0.63880100  | -1.93061800 |
| H | -2.32926400 | 2.11638800  | -1.89939000 |
| H | 3.96806400  | 0.50683200  | -1.50727700 |
| H | -2.85250900 | -0.69925600 | -1.93072000 |
| C | 0.93897500  | -0.64450800 | 2.37333600  |
| H | 0.67353500  | 0.25655600  | 2.94887600  |
| H | 0.63962700  | -1.51125100 | 2.97678100  |
| H | 2.02523800  | -0.68026000 | 2.31067600  |
| C | -1.28838700 | -2.56442200 | 1.21989400  |
| H | -0.65511600 | -3.22761100 | 0.64059500  |
| H | -1.08831700 | -2.75752600 | 2.27420500  |
| H | -2.33824100 | -2.81647100 | 1.04668600  |
| C | -1.90574500 | -0.30971000 | 1.95885400  |
| H | -2.95248200 | -0.60996200 | 1.87837700  |
| H | -1.57429200 | -0.59532700 | 2.95783100  |
| H | -1.79847100 | 0.76311000  | 1.84127300  |
| H | 0.92631300  | -2.79277900 | -2.19908400 |
| H | 0.86802300  | -2.75536200 | -0.44221800 |
| H | 1.58951300  | 3.44571100  | 0.80371700  |
| H | 0.75021100  | 2.18090100  | 1.70780400  |

| <b>cat3_im1_CP2</b> | <b>Energy (E)</b> | <b>Energy(E)+ZPE</b> | <b>Enthalpy (H)</b> | <b>Gibbs free energy (G)</b> |
|---------------------|-------------------|----------------------|---------------------|------------------------------|
| <b>IEFPCM (THF)</b> | -856.295323       | -855.802091          | -855.782003         | -855.846304                  |

|   |             |             |             |
|---|-------------|-------------|-------------|
| C | 0.65757000  | 0.76024200  | 2.39056500  |
| C | 0.46790600  | -1.58234000 | -2.12362600 |
| C | 1.34864500  | -0.29398200 | 1.52866700  |
| C | 1.26707800  | -1.48181500 | -0.82715400 |
| B | 0.63870200  | -0.30406900 | 0.07380700  |
| C | 2.79664700  | -1.55945400 | -0.85899200 |
| C | 2.87962100  | -0.41136300 | 1.54510500  |
| C | 3.35778900  | -1.53492800 | 0.58748000  |
| C | -0.90891200 | -0.69187900 | 0.33809900  |
| C | -2.93038200 | -0.10900300 | 1.51822700  |
| C | -3.72766300 | -0.34175300 | 0.24244700  |
| C | -3.01479400 | -1.37088900 | -0.62522400 |
| N | -1.56164500 | 0.29408700  | 1.21397200  |
| C | -0.83729800 | 0.41821000  | 2.48795300  |
| C | -0.99077200 | -1.90801000 | -1.77085600 |
| H | 3.22042000  | -0.67847800 | 2.55280800  |
| H | 3.37893600  | 0.53371300  | 1.32390400  |
| H | 4.45119200  | -1.54825500 | 0.55929900  |
| H | -3.40045800 | 0.66372600  | 2.13386200  |
| H | -4.72898000 | -0.69807800 | 0.49500600  |

|   |             |             |             |
|---|-------------|-------------|-------------|
| H | -3.83188700 | 0.59532600  | -0.30846800 |
| H | -3.54470800 | -1.51528600 | -1.57104000 |
| H | -1.59124400 | -1.98820200 | -2.68176000 |
| H | -1.00322500 | -2.90371000 | -1.28859900 |
| N | -1.65633000 | -0.92920400 | -0.90540500 |
| H | 3.05349700  | -2.48292900 | 1.04550000  |
| H | 0.50846700  | -0.64133800 | -2.68467400 |
| H | 0.83405100  | -2.37363600 | -2.78913800 |
| H | 1.05227800  | 0.79949400  | 3.41320200  |
| H | 0.77757200  | 1.76372500  | 1.96480900  |
| H | -2.93060100 | -1.04672900 | 2.10784200  |
| H | -3.00413100 | -2.34385300 | -0.09694200 |
| H | -0.88531500 | -1.66765500 | 0.89266100  |
| C | 0.03208600  | 2.18513400  | -0.99990200 |
| N | 0.84028100  | 1.24865300  | -0.62394900 |
| C | -1.43807100 | 2.04206000  | -1.18708500 |
| H | -1.93709000 | 2.35574900  | -0.26774400 |
| H | -1.74374800 | 2.70174200  | -2.00184800 |
| H | -1.71278600 | 1.00772700  | -1.38036500 |
| C | 2.26021900  | 1.63824400  | -0.65021400 |
| H | 2.49826900  | 2.28708000  | 0.19518900  |
| H | 2.86628500  | 0.75435100  | -0.57982400 |
| H | 2.50408500  | 2.15233000  | -1.57898900 |
| H | 1.01469300  | -1.26275900 | 1.93231100  |
| H | 0.98047400  | -2.37226400 | -0.24329000 |
| C | 0.54043600  | 3.57350800  | -1.32325800 |
| H | 1.30882000  | 3.91657100  | -0.63315000 |
| H | 0.96087700  | 3.59519500  | -2.33332000 |
| H | -0.29372000 | 4.27098500  | -1.29723800 |
| H | 3.24493300  | -0.78292900 | -1.48617900 |
| H | 3.11735200  | -2.50354400 | -1.31616500 |
| H | -0.91699500 | -0.53258500 | 3.04907000  |
| H | -1.35760300 | 1.17822300  | 3.07851800  |

| <b>cat3_am1_CP</b>  | <b>Energy (E)</b> | <b>Energy(E)+ZPE</b> | <b>Enthalpy (H)</b> | <b>Gibbs free energy (G)</b> |
|---------------------|-------------------|----------------------|---------------------|------------------------------|
| <b>IEFPCM (THF)</b> | -857.526338       | -857.007848          | -856.987502         | -857.051992                  |

|   |             |             |             |
|---|-------------|-------------|-------------|
| C | -0.06614200 | 2.70190300  | -0.87728500 |
| C | 0.49981200  | -1.54145000 | 2.05577200  |
| C | 0.78119100  | 1.96619800  | 0.16273100  |
| C | 1.05809000  | -0.16078600 | 1.67960800  |
| B | 0.35347800  | 0.43236400  | 0.35903900  |
| C | 2.57851600  | 0.06008400  | 1.69194200  |
| C | 2.30034800  | 2.12691700  | 0.12272300  |
| C | 2.92468500  | 1.53713100  | 1.40462200  |
| C | -1.25111900 | 0.35560300  | 0.55351300  |

|   |             |             |             |
|---|-------------|-------------|-------------|
| C | -3.35807300 | 0.82733600  | -0.54013600 |
| C | -3.71116500 | -0.65071700 | -0.45988700 |
| C | -3.06046000 | -1.25776200 | 0.77339100  |
| N | -1.91097900 | 0.97521500  | -0.60218400 |
| C | -1.55776200 | 2.40237300  | -0.65026700 |
| C | -1.03517700 | -1.53275500 | 2.00507500  |
| N | -1.61352300 | -1.06233200 | 0.73352300  |
| C | 1.67415300  | -1.66350100 | -1.02238300 |
| N | 0.57392800  | -0.63692800 | -1.00254800 |
| H | 1.96758800  | -1.80922700 | 0.00815100  |
| H | 2.71521200  | 1.62743800  | -0.76105800 |
| H | -3.76905700 | 1.34920100  | 0.34513300  |
| H | -3.80042100 | 1.28480400  | -1.42919400 |
| H | -3.33988500 | -1.15655200 | -1.35473400 |
| H | -4.79431600 | -0.78113700 | -0.41193900 |
| H | -3.48495200 | -0.77731000 | 1.67368300  |
| H | -3.27000500 | -2.32884200 | 0.84020100  |
| H | -1.41257800 | -2.54383300 | 2.18025100  |
| H | -1.41290600 | -0.90020900 | 2.82779700  |
| H | 0.66927200  | 0.51294400  | 2.46086900  |
| H | 3.01039300  | -0.21719000 | 2.66146900  |
| H | 3.08890100  | -0.56336700 | 0.95140000  |
| H | 2.57038600  | 2.13944200  | 2.24941000  |
| H | 4.01199300  | 1.65308700  | 1.37510200  |
| H | 2.59706400  | 3.18010700  | 0.04223200  |
| H | 0.46835300  | 2.40206700  | 1.12722400  |
| H | -1.86647000 | 2.88685300  | 0.29502600  |
| H | -2.15117600 | 2.85741700  | -1.44827000 |
| H | -1.55890600 | 0.91139100  | 1.47413600  |
| H | -0.28205800 | -1.17209900 | -0.79594100 |
| C | 1.13419300  | -2.99225200 | -1.54960700 |
| H | 1.91056900  | -3.75632000 | -1.48756900 |
| H | 0.28015700  | -3.32331900 | -0.95390800 |
| H | 0.82209100  | -2.92006900 | -2.59342600 |
| C | 0.38726500  | -0.05712000 | -2.35301500 |
| H | 0.39585700  | -0.84515800 | -3.10858900 |
| H | -0.57114100 | 0.44912500  | -2.36268000 |
| H | 1.19018000  | 0.64530400  | -2.56295500 |
| C | 2.91188500  | -1.21841800 | -1.79258300 |
| H | 3.27114000  | -0.24798400 | -1.45216100 |
| H | 3.70386400  | -1.94875400 | -1.61831600 |
| H | 2.73511200  | -1.17261300 | -2.86786400 |
| H | 0.21399900  | 2.44141500  | -1.89857200 |
| H | 0.06434300  | 3.78797800  | -0.79624400 |
| H | 0.79722500  | -1.83462500 | 3.06973400  |
| H | 0.85536500  | -2.34018100 | 1.39958200  |



| cat4_im1_CPI        | Energy (E)   | Energy(E)+ZPE | Enthalpy (H) | Gibbs free energy (G) |
|---------------------|--------------|---------------|--------------|-----------------------|
| <b>IEFPCM (THF)</b> | -1253.414127 | -1252.950565  | -1252.928429 | -1252.996211          |

|   |             |             |             |
|---|-------------|-------------|-------------|
| C | 1.71796800  | 1.77193400  | -0.73690700 |
| C | -2.62605700 | -0.70516400 | -0.09972800 |
| C | 0.22709100  | 1.88647100  | -0.88420400 |
| C | -2.01972100 | 0.62461100  | -0.40955600 |
| B | -0.41884400 | 0.56016200  | -0.19352700 |
| C | -2.63954200 | 1.87990200  | 0.20219200  |
| C | -0.39370800 | 3.12386400  | -0.22481900 |
| C | -1.92738200 | 3.11900600  | -0.37664700 |
| C | 0.16533700  | -0.75536500 | -0.93574400 |
| C | 2.26526800  | -2.08412300 | -0.64097500 |
| C | 1.40182900  | -3.34755800 | -0.72216700 |
| C | 0.03893900  | -3.09134300 | -1.36483400 |
| N | 1.52848300  | -0.82948700 | -0.26186500 |
| C | 2.30538700  | 0.33909600  | -0.83675200 |
| C | -2.00217400 | -1.82882700 | -0.92243500 |
| H | -3.70823800 | 1.94109700  | -0.02313000 |
| H | -2.54884800 | 1.86274300  | 1.29009100  |
| H | 0.00434700  | 4.05449300  | -0.64194100 |
| H | -0.12718400 | 3.11666400  | 0.83494700  |
| H | -2.33524300 | 4.02244200  | 0.08412400  |
| H | 3.09808500  | -2.21268900 | 0.05127100  |
| H | 1.96583100  | -4.07599800 | -1.30926300 |
| H | 1.24494800  | -3.77349800 | 0.26467700  |
| H | -0.58799500 | -3.97736900 | -1.24689200 |
| H | 3.30813900  | 0.33420200  | -0.41523900 |
| H | 2.37766000  | 0.13925200  | -1.90373300 |
| H | -2.49117400 | -2.76109700 | -0.63356700 |
| H | -2.24046000 | -1.63058800 | -1.97909700 |
| C | 1.25594300  | -0.62652400 | 1.26885800  |
| N | 0.23107500  | 0.37415700  | 1.22067500  |
| N | -0.57147300 | -1.96502600 | -0.68560600 |
| H | 0.03003400  | 1.90581400  | -1.96400400 |
| H | -2.14250500 | 0.72166800  | -1.49957900 |
| H | 0.38859900  | -0.64294300 | -2.01337600 |
| H | 0.14779400  | -2.89740500 | -2.44732000 |
| H | -2.16818100 | 3.17948400  | -1.44499900 |
| H | 2.67908500  | -1.88491400 | -1.63040600 |
| F | -2.50992400 | -1.02571000 | 1.23266500  |
| F | -3.98080200 | -0.73993800 | -0.36579200 |
| F | 2.17335100  | 2.37321800  | 0.40607900  |
| F | 2.40055900  | 2.42781000  | -1.75154000 |
| C | -0.34429600 | 0.74064500  | 2.49559800  |
| H | -1.10677900 | 0.04011000  | 2.85726800  |
| H | 0.42949700  | 0.83330500  | 3.26585200  |
| H | -0.81055400 | 1.72139500  | 2.41665300  |

|   |             |             |            |
|---|-------------|-------------|------------|
| C | 2.55984900  | -0.17661200 | 1.95445400 |
| H | 2.84396500  | 0.83085100  | 1.67364300 |
| H | 2.39172600  | -0.19114000 | 3.03104200 |
| H | 3.38024300  | -0.87341600 | 1.76186800 |
| C | 0.82370200  | -1.92384900 | 1.97299100 |
| H | 1.62680800  | -2.66305900 | 2.01391900 |
| H | 0.60538800  | -1.63858700 | 3.00294900 |
| H | -0.07661800 | -2.33453100 | 1.53078000 |

| <b>cat4_im1_CP2</b> | <b>Energy (E)</b> | <b>Energy(E)+ZPE</b> | <b>Enthalpy (H)</b> | <b>Gibbs free energy (G)</b> |
|---------------------|-------------------|----------------------|---------------------|------------------------------|
| <b>IEFPCM (THF)</b> | -1253.418912      | -1252.956662         | -1252.933566        | -1253.004481                 |

|   |             |             |             |
|---|-------------|-------------|-------------|
| C | -0.54909800 | -2.12530800 | -1.03662300 |
| C | 1.47370900  | 2.21963800  | 0.66036400  |
| C | 0.64525200  | -1.19176000 | -1.20974200 |
| C | 1.68661000  | 1.04935500  | -0.29270100 |
| B | 0.51293900  | -0.03622600 | -0.08779600 |
| C | 3.06444600  | 0.50851800  | -0.53694300 |
| C | 2.05122900  | -1.77413000 | -1.41964000 |
| C | 3.09627400  | -0.63763200 | -1.55293700 |
| C | -0.84522500 | 0.75863300  | -0.45382900 |
| C | -3.25434900 | 0.55289100  | -0.80826300 |
| C | -3.45449300 | 1.78323200  | 0.06441400  |
| C | -2.23367800 | 2.68813800  | -0.03221100 |
| N | -2.01591300 | -0.14005200 | -0.41493300 |
| C | -1.83774900 | -1.32451900 | -1.19026500 |
| C | 0.12313300  | 2.85883600  | 0.30527500  |
| H | 2.08574600  | -2.34548000 | -2.35337800 |
| H | 2.34463300  | -2.47806300 | -0.64189900 |
| H | 4.11263600  | -1.03703400 | -1.55340600 |
| H | -4.08762900 | -0.14098200 | -0.70906200 |
| H | -4.34185600 | 2.32265900  | -0.27359200 |
| H | -3.61557400 | 1.48862300  | 1.10321200  |
| H | -2.34782700 | 3.56389000  | 0.61225200  |
| H | -0.08579700 | 3.69472900  | 0.97794800  |
| H | 0.21108300  | 3.27897200  | -0.71383000 |
| N | -1.03703900 | 1.96029100  | 0.37105400  |
| H | 2.94576900  | -0.15023900 | -2.51951700 |
| H | 1.46715500  | 1.88003400  | 1.70021100  |
| H | 2.24883300  | 2.98455200  | 0.56175800  |
| H | -0.61416100 | -2.91633700 | -1.78891000 |
| H | -0.56861800 | -2.60020400 | -0.05203000 |
| H | -3.19172200 | 0.86696700  | -1.85866700 |
| H | -2.13274200 | 3.04940200  | -1.07322600 |
| H | -0.72737800 | 1.10476900  | -1.50790100 |
| C | -0.40242600 | -0.88151300 | 2.37654100  |
| N | 0.48369700  | -0.79098900 | 1.43746700  |

|   |             |             |             |
|---|-------------|-------------|-------------|
| F | 3.69982500  | 0.13563000  | 0.63784900  |
| F | 3.88082800  | 1.50467500  | -1.03798000 |
| F | -2.89898000 | -2.15542000 | -0.93182700 |
| F | -1.95605400 | -1.03185400 | -2.54691900 |
| C | -1.61649800 | -0.03239500 | 2.52302800  |
| H | -2.46411100 | -0.56305900 | 2.08286000  |
| H | -1.80600000 | 0.10404400  | 3.58963800  |
| H | -1.50280100 | 0.91850800  | 2.01034100  |
| C | 1.64673200  | -1.67814600 | 1.62911300  |
| H | 1.39313700  | -2.70439200 | 1.35642700  |
| H | 2.46098000  | -1.33431500 | 1.01968800  |
| H | 1.98051100  | -1.65232800 | 2.66434300  |
| H | 0.44549300  | -0.64436000 | -2.14100200 |
| H | 1.44178700  | 1.42968400  | -1.29574300 |
| C | -0.26755700 | -1.90306800 | 3.48411000  |
| H | 0.11718700  | -2.86033200 | 3.13922100  |
| H | 0.40594300  | -1.52692000 | 4.26020400  |
| H | -1.24302200 | -2.05830900 | 3.93968200  |

| <b>cat4_am1_CP</b>  | Energy (E)   | Energy(E)+ZPE | Enthalpy (H) | Gibbs free energy (G) |
|---------------------|--------------|---------------|--------------|-----------------------|
| <b>IEFPCM (THF)</b> | -1254.646521 | -1254.158932  | -1254.135592 | -1254.206336          |

|   |             |             |             |
|---|-------------|-------------|-------------|
| C | -2.46547400 | -0.89418800 | -0.52465200 |
| C | 2.55963000  | -0.24239200 | -0.60254800 |
| C | -1.13665600 | -1.55241700 | -0.72548700 |
| C | 1.43107900  | -1.21299700 | -0.75336000 |
| B | 0.04892600  | -0.56803900 | -0.21648800 |
| C | 1.66378100  | -2.68387700 | -0.39176200 |
| C | -0.95340400 | -2.99512600 | -0.25279000 |
| C | 0.41354400  | -3.52450800 | -0.74510400 |
| C | -0.14825800 | 0.84728600  | -0.95763800 |
| C | -1.65369300 | 2.72957500  | -1.22169700 |
| C | -0.52520000 | 3.66032900  | -0.80020700 |
| C | 0.81153600  | 3.05848000  | -1.20941200 |
| N | -1.46324200 | 1.41388900  | -0.62153800 |
| C | -2.52262200 | 0.52241000  | -1.08448000 |
| C | 2.21827000  | 1.15598500  | -1.11451500 |
| N | 0.97047400  | 1.73413200  | -0.61790300 |
| C | -0.16379100 | 0.99840500  | 2.11843900  |
| N | -0.11740100 | -0.38449000 | 1.48016500  |
| H | -0.46956100 | 1.66022100  | 1.32100100  |
| H | -1.03291400 | -3.06121900 | 0.83663100  |
| H | -1.66241400 | 2.65273200  | -2.32560300 |
| H | -2.62350800 | 3.12412200  | -0.90816500 |
| H | -0.54958000 | 3.80442000  | 0.28265900  |
| H | -0.65267000 | 4.63488900  | -1.27560000 |
| H | 0.85091900  | 2.99465600  | -2.31370500 |

|   |             |             |             |
|---|-------------|-------------|-------------|
| H | 1.64080300  | 3.69179700  | -0.88423000 |
| H | 3.04706300  | 1.81225000  | -0.84000100 |
| H | 2.20375800  | 1.07479300  | -2.21537600 |
| H | 1.25695600  | -1.20416000 | -1.83996200 |
| H | 2.51288100  | -3.08014900 | -0.95567200 |
| H | 1.92249900  | -2.80211500 | 0.65973900  |
| H | 0.35549900  | -3.58328200 | -1.83811600 |
| H | 0.55674400  | -4.54815100 | -0.39040800 |
| H | -1.74111300 | -3.64159800 | -0.64979300 |
| H | -1.02070000 | -1.56005100 | -1.81805500 |
| H | -2.50376800 | 0.41313600  | -2.18279300 |
| H | -3.49022600 | 0.94586100  | -0.80711400 |
| H | -0.12764500 | 0.67609500  | -2.06804900 |
| H | -1.08082000 | -0.69703400 | 1.57025100  |
| F | 2.98887100  | -0.15819200 | 0.71007000  |
| F | 3.67845100  | -0.64319500 | -1.30161700 |
| F | -2.80021300 | -0.85758300 | 0.83163600  |
| F | -3.49365900 | -1.59418800 | -1.10721600 |
| C | -1.25191500 | 1.01170900  | 3.18958600  |
| H | -1.32274100 | 2.01429400  | 3.61395300  |
| H | -2.22069300 | 0.75927700  | 2.75482700  |
| H | -1.04094600 | 0.32362100  | 4.01217000  |
| C | 0.67264800  | -1.31405000 | 2.32712600  |
| H | 0.41248100  | -1.16890100 | 3.37538900  |
| H | 0.44409100  | -2.33729400 | 2.05029800  |
| H | 1.72908400  | -1.12518900 | 2.17965100  |
| C | 1.17797500  | 1.46539200  | 2.65909300  |
| H | 1.94949900  | 1.39675800  | 1.89913700  |
| H | 1.07033900  | 2.51291500  | 2.94732800  |
| H | 1.48747100  | 0.91112500  | 3.54755300  |
